# Supplementary material
Source: publisher figshare collection journal article supplement (https://acs.figshare.com/ndownloader/files/4613869)

# Transition Metal-Catalyzed Chemoselective Methylenation of Dicarbonyl Substrates.

*Hélène Lebel\*, Michaël Davi and Grzegorz T. Stokłosa.*

Département de chimie, Université de Montréal,  
2900, Boul Edouard Montpetit, Montréal, Québec, H3T 1J4.

## Supporting Information

|                                                             |     |
|-------------------------------------------------------------|-----|
| Table S1.....                                               | S2  |
| General Information.....                                    | S3  |
| Synthesis of Dicarbonyl Substrates.....                     | S3  |
| General Procedure for the Chemoselective Methylenation..... | S15 |
| Characterization of Alkene Products.....                    | S15 |
| NMR Spectra.....                                            | S20 |

**Table S1. Chemoselective Wittig Methylenation of Ketoaldehyde 11 with Various Bases.**

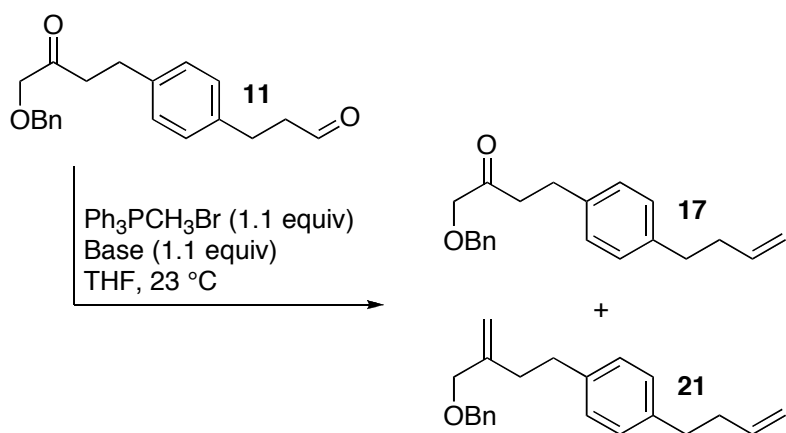

| entry | Base                                         | yield (%) <sup>a</sup> |           |
|-------|----------------------------------------------|------------------------|-----------|
|       |                                              | <b>17</b>              | <b>21</b> |
| 1     | <i>n</i> -BuLi <sup>c</sup>                  | 46                     | 31        |
| 2     | LiHMDS                                       | 41                     | 30        |
| 3     | NaHMDS                                       | 56                     | 31        |
| 4     | KHMDS                                        | 56                     | 14        |
| 5     | Cs <sub>2</sub> CO <sub>3</sub> <sup>b</sup> | 20                     | ---       |

<sup>a</sup>Isolated yields. <sup>b</sup>Cs<sub>2</sub>CO<sub>3</sub> (3 equiv), 0.1 M in THF/DMF (1:1) at reflux. <sup>c</sup>At -78 °C.

## General Information

Unless otherwise noted, all non-aqueous reactions were performed under an oxygen-free atmosphere of argon with rigid exclusion of moisture from reagents and glassware using standard techniques for manipulating air-sensitive compounds. The solvents were dried using standard methods prior to use. Dioxane and 2-propanol were distilled over calcium hydride.  $\text{RhCl}(\text{PPh}_3)_3$  is commercially available, but was prepared from  $\text{RhCl}_3 \cdot 3\text{H}_2\text{O}$  and 4  $\text{PPh}_3$  according to the literature.<sup>1</sup>  $\text{CuCl}$  was purchased from Strem and used without further purification.  $\text{TMSCHN}_2$  is commercially available, but was prepared according to the literature.<sup>2,3</sup> Analytical thin layer chromatography (TLC) was performed using EM Reagent 0.25 mm silica gel 60-F plates. Flash chromatography was performed using EM Silica Gel 60 (230-400 mesh) with the indicated solvent system. Melting points are uncorrected. Infrared spectra are reported in reciprocal centimeters ( $\text{cm}^{-1}$ ). Only the most important and relevant frequencies are reported.  $^1\text{H}$  NMR spectra were recorded in  $\text{CDCl}_3$ , unless otherwise noted and chemical shifts are reported in ppm on the  $\delta$  scale from an internal standard of residual chloroform (7.27 ppm). Data are reported as follows: chemical shift, multiplicity (s = singlet, d = doublet, t = triplet, q = quartet, qn = quintet, m = multiplet and br = broad), coupling constant in Hz, integration.  $^{13}\text{C}$  NMR spectra were recorded in  $\text{CDCl}_3$ , unless otherwise noted, with complete proton decoupling. Chemical shifts are reported in ppm from the central peak of  $\text{CDCl}_3$  (76.9 ppm) on the  $\delta$  scale.

## Synthesis of Dicarboxyl Substrates

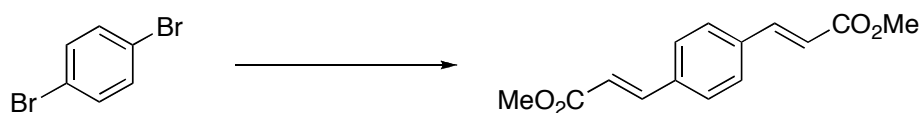

**(2E,2'E)-Dimethyl 3,3'-(1,4-phenylene)diprop-2-enoate.** A solution of palladium acetate (670 mg, 3.00 mmol),  $\text{IMes} \cdot \text{HCl}$  (1.97 g, 5.80 mmol) and potassium carbonate (40.6 g, 294 mmol) in DMF (75 mL) was stirred for 15 min. A solution of *p*-dibromobenzene (17.3 g, 73.4 mmol) in DMF (75 mL) was then added, followed by the addition of methyl acrylate (21.5 mL, 239 mmol). The resulting mixture was heated to 120 °C and stirred for 60 h. The mixture was cooled to rt, then added to water (150 mL). The mixture was washed with dichloromethane (3 x 150 mL), and the combined organic layers were washed with saturated aqueous  $\text{NaHCO}_3$ , then dried over  $\text{Na}_2\text{SO}_4$ . The solvent was removed under reduced pressure and the residue was purified by flash chromatography (100%  $\text{CH}_2\text{Cl}_2$ ) to give a black solid which is further purified by washing with ether to produce a white solid (17.4 g, 96% y.).  $R_f$  0.45 (25%  $\text{EtOAc}$ /hexanes). IR (neat) 1724, 1433, 1166, 943, 842, 638  $\text{cm}^{-1}$ .  $^1\text{H}$  NMR (400 MHz,  $\text{CDCl}_3$ )  $\delta$  7.67 (d,  $J$  = 16 Hz, 2H), 7.53 (s, 4H), 6.47 (d,  $J$  = 16 Hz, 2H), 3.81 (s, 6H).  $^{13}\text{C}$  NMR (100 MHz,  $\text{CDCl}_3$ )  $\delta$  167.1, 143.6, 136.1, 128.5, 118.9, 51.8. Elemental analysis calcd for  $\text{C}_{14}\text{H}_{14}\text{O}_4$ : C, 68.28; H, 5.73; Found: C, 68.31; H, 5.74.

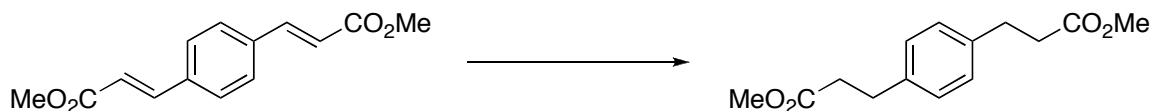

**Dimethyl 3,3'-(1,4-phenylene)dipropanoate.** A solution of (2E,2'E)-dimethyl 3,3'-(1,4-phenylene)diprop-2-enoate (15.0 g, 60.8 mmol) and palladium 10% on carbon (3.36 g, 3.20 mmol) in methanol (600 mL) was stirred under an atmosphere of hydrogen for 6 h. The mixture was filtered

<sup>1</sup> Osborn J. A.; Wilkinson, G. *Inorg. Synth.* **1990**, 28, 77-79.

<sup>2</sup> Lebel, H.; Paquet, V. *J. Am. Chem. Soc.* **2004**, 126, 320-328.

<sup>3</sup> As the quality of Aldrich's solution change from batch to batch, it is highly recommended to check the purity of commercial solution's ( $^1\text{H}$  NMR or GC-MS spectra) prior to use. For instance, we have experienced a batch that contain up to 50% of  $\text{TMSCH}_2\text{Cl}$ . See : Lebel, H.; Guay, D.; Paquet, V.; Huard, K. *Org. Lett.* **2004**, 6, 3047-3050.

through Celite, washed with dichloromethane (2 L), and the solvent was removed under reduced pressure to provide the desired pur product as a white solid (15.2 g, 100% y.).  $R_f$  0.35 (25% EtOAc/hexanes). IR (neat) 2956, 1727, 1433, 1301, 1178, 1148, 836  $\text{cm}^{-1}$ .  $^1\text{H}$  NMR (400 MHz,  $\text{CDCl}_3$ )  $\delta$  7.12 (s, 4H), 3.66 (s, 6H), 2.91 (t,  $J = 8$  Hz, 4H), 2.61 (t,  $J = 8$  Hz, 4H).  $^{13}\text{C}$  NMR (100 MHz,  $\text{CDCl}_3$ )  $\delta$  173.3, 138.3, 128.3, 51.5, 35.6, 30.4. Elemental analysis calcd for  $\text{C}_{14}\text{H}_{18}\text{O}_4$ : C, 67.18; H, 7.25; Found: C, 67.26; H, 7.38.

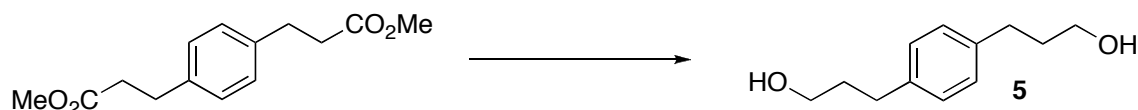

**3,3'-(1,4-Phenylene)dipropanol-1-ol (5).** To a solution of dimethyl 3,3'-(1,4-phenylene)dipropionate (11.0 g, 44.0 mmol) in ether (600 mL) at 0 °C, was added  $\text{LiAlH}_4$  (8.87 g, 222 mmol) in 4 portions. The resulting mixture was stirred for 12 h at rt. The reaction was poured into a mixture of saturated aqueous solution of Rochelle's salt (200 mL), dichloromethane (150 mL) and ice (~200 g) and stirred until the two layers were colorless. The two layers were separated and the aqueous layer was washed with dichloromethane (3 x 100 mL). The combined organic layers were washed with aqueous 1N HCl (200 mL), water (200 mL), saturated aqueous  $\text{NaHCO}_3$  (200 mL), saturated aqueous NaCl (200 mL), then dried over  $\text{Na}_2\text{SO}_4$ . The solvent was removed under reduced pressure to provide the desired pur product **5** as a white solid (8.29 g, 97% y.).  $R_f$  0.20 (50% EtOAc/hexanes). IR (neat) 3330, 3247, 2927, 2874, 1433, 1059, 1032, 907, 835  $\text{cm}^{-1}$ .  $^1\text{H}$  NMR (400 MHz,  $\text{CDCl}_3$ )  $\delta$  7.12 (s, 4H), 3.67 (t,  $J = 6$  Hz, 4H), 2.67 (t,  $J = 8$  Hz, 4H), 1.91-1.84 (m, 4H), 1.51-1.49 (m, 2H).  $^{13}\text{C}$  NMR (100 MHz,  $\text{CDCl}_3$ )  $\delta$  139.2, 128.4, 62.2, 34.2, 31.5. Elemental analysis calcd for  $\text{C}_{12}\text{H}_{18}\text{O}_2$ : C, 74.19; H, 9.34; Found: C, 73.94; H, 9.66.

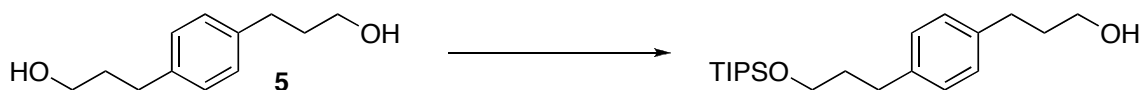

**3-(4-(3-(Triisopropylsilyloxy)propyl)phenyl)propan-1-ol.** To a suspension of sodium hydride (0.41 g, 10.3 mmol) in THF (8 mL) was added a solution of **5** (2.00 g, 10.3 mmol) in THF (12 mL). The resulting mixture was stirred for 30 min, before the addition of triisopropylsilyl chloride (2.18 mL, 10.3 mmol). After vigorous stirring for 30 min, the mixture was poured into a 10% aqueous solution of potassium carbonate (200 mL). The aqueous layer was washed with dichloromethane (3 x 60 mL). The combined organic layers were washed with saturated aqueous NaCl (200 mL), then dried over  $\text{Na}_2\text{SO}_4$ . The solvent was removed under reduced pressure and the residue was purified by flash chromatography with a solvent gradient (10% EtOAc/hexanes, 25% EtOAc/hexanes et 8:1:1  $\text{CH}_2\text{Cl}_2/\text{EtOAc}/\text{MeOH}$ ) to give a colorless oil (2.03 g, 56% y.).  $R_f$  0.30 (25% EtOAc/hexanes). IR (neat) 2941, 2865, 1464, 1105, 883  $\text{cm}^{-1}$ .  $^1\text{H}$  NMR (400 MHz,  $\text{CDCl}_3$ )  $\delta$  7.14 (s, 4H), 3.74 (t,  $J = 6$  Hz, 2H), 3.67 (t,  $J = 6$  Hz, 2H), 2.72-2.67 (m, 4H), 1.96 (s, 1H), 1.93-1.83 (m, 4H), 1.11-1.08 (m, 21H).  $^{13}\text{C}$  NMR (75 MHz,  $\text{CDCl}_3$ )  $\delta$  139.7, 138.9, 128.4, 128.2, 62.5, 62.1, 34.6, 34.2, 31.6, 31.5, 17.9, 11.9. HMRS (CI) calcd for  $\text{C}_{21}\text{H}_{39}\text{O}_2\text{Si}$   $[\text{M}+\text{H}]^+$ : 351.2714. Found: 351.2704.

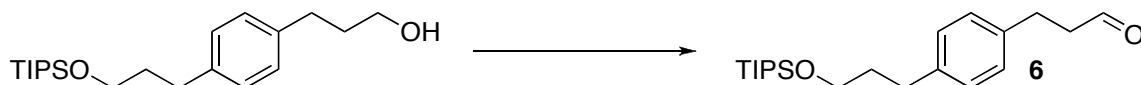

**3-(4-(3-(Triisopropylsilyloxy)propyl)phenyl)propanal (6).** To a solution of 3-(4-(3-(triisopropylsilyloxy)propyl)phenyl)propan-1-ol (3.00 g, 8.50 mmol) in dichloromethane (20 mL) at 0 °C, was added TEMPO (13 mg, 0.080 mmol), followed by potassium bromide (152 mg, 1.27 mmol). The resulting mixture was stirred at 0 °C for 15 min. A solution of buffered bleach (32.0 mL, 25.7 mmol, pH ~9 using saturated solution of  $\text{NaHCO}_3$ ) was then added and the resulting mixture was vigorously

stirred for 1 h at room temperature. The two layers were separated and the aqueous layer was washed with dichloromethane (20 mL). The combined organic layers were washed with 10% aqueous hydrochloric acid containing 1.6 g (0.010 mol) of potassium iodide (50 mL), 10% aqueous sodium thiosulfate (20 mL), then water (20 mL), then dried over Na<sub>2</sub>SO<sub>4</sub>. The solvent was removed under reduced pressure and the residue was purified by flash chromatography (10% EtOAc/hexanes) to give **6** as a colorless oil (2.98 g, 100% y.). *R*<sub>f</sub> 0.55 (25% EtOAc/hexanes). IR (neat) 2943, 2866, 1713, 1464, 1104, 883, 680 cm<sup>-1</sup>. <sup>1</sup>H NMR (400 MHz, CDCl<sub>3</sub>) δ 9.82 (t, *J* = 1 Hz, 1H), 7.16 (d, *J* = 8 Hz, 2H), 7.12 (d, *J* = 8 Hz, 2H), 3.73 (t, *J* = 6 Hz, 2H), 2.94 (t, *J* = 8 Hz, 2H), 2.79-2.67 (m, 4H), 1.91-1.81 (m, 2H), 1.13-1.07 (m, 21H). <sup>13</sup>C NMR (100 MHz, CDCl<sub>3</sub>) 201.5, 140.2, 137.4, 128.6, 128.0, 62.4, 45.3, 34.6, 31.5, 27.6, 17.9, 11.9. HMRS (CI) calcd for C<sub>21</sub>H<sub>37</sub>O<sub>2</sub>Si [M+H]<sup>+</sup>: 349.2557. Found: 349.2562.

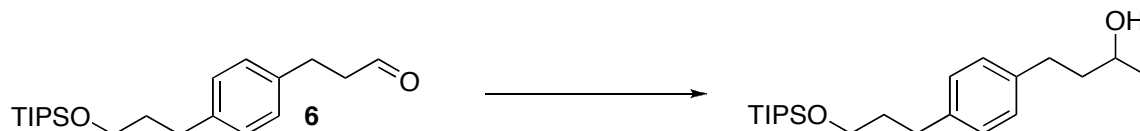

**4-(4-(3-(Triisopropylsilyloxy)propyl)phenyl)butan-2-ol.** To a solution of **6** (9.96 g, 28.6 mmol) in ether (300 mL) at -78 °C, was added dropwise a solution of methylmagnesium iodide in ether (12.4 mL, 34.8 mmol) (internal temperature < 5 °C). The resulting mixture was warmed to 0 °C and stirred for 1 h. A saturated aqueous solution of NH<sub>4</sub>Cl (50 mL) was added. The two layers were separated and the aqueous layer was washed with ether (3 x 60 mL). The combined organic layers were washed with water (100 mL), aqueous 1N HCl (100 mL), saturated aqueous NaHCO<sub>3</sub> (100 mL) and saturated aqueous NaCl (100 mL), then dried over Na<sub>2</sub>SO<sub>4</sub>. The solvent was removed under reduced pressure and the residue was purified by flash chromatography (10% EtOAc/hexanes) to give a colorless oil (8.12 g, 78% y.). *R*<sub>f</sub> 0.30 (25% EtOAc/hexanes). IR (neat) 3360, 2941, 2865, 1463, 1102, 882, 678 cm<sup>-1</sup>. <sup>1</sup>H NMR (400 MHz, CDCl<sub>3</sub>) δ 7.13 (s, 4H), 3.85-3.81 (m, 1H), 3.72 (t, *J* = 6 Hz, 2H), 2.77-2.61 (m, 4H), 1.89-1.82 (m, 2H), 1.80-1.73 (m, 2H), 1.58 (s, 1H), 1.23 (d, *J* = 6 Hz, 3H), 1.10-1.06 (m, 21H). <sup>13</sup>C NMR (100 MHz, CDCl<sub>3</sub>) δ 139.7, 139.1, 128.4, 128.2, 67.4, 62.5, 40.8, 34.7, 31.6, 31.6, 23.5, 18.0, 11.9. HMRS (CI) calcd for C<sub>22</sub>H<sub>41</sub>O<sub>2</sub>Si [M+H]<sup>+</sup>: 365.2870. Found: 365.2863.

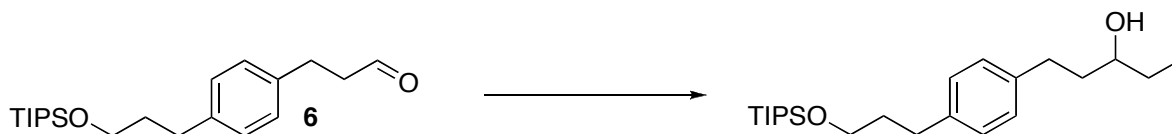

**1-(4-(3-(Triisopropylsilyloxy)propyl)phenyl)pentan-3-ol.** To a solution of **6** (2.98 g, 8.54 mmol) in ether (90 mL) at -78 °C, was added dropwise a solution of ethylmagnesium iodide in ether (3.50 mL, 9.28 mmol) (internal temperature < 5 °C). The resulting mixture was warmed to 0 °C and stirred for 1 h. A saturated aqueous solution of NH<sub>4</sub>Cl (20 mL) was added. The two layers were separated and the aqueous layer was washed with ether (3 x 50 mL). The combined organic layers were washed with water (50 mL), aqueous 1N HCl (50 mL), saturated aqueous NaHCO<sub>3</sub> (50 mL) and saturated aqueous NaCl (50 mL), then dried over Na<sub>2</sub>SO<sub>4</sub>. The solvent was removed under reduced pressure and the residue was purified by flash chromatography (15% EtOAc/hexanes) to give a colorless oil (2.45 g, 76% y.). *R*<sub>f</sub> 0.45 (25% EtOAc/hexanes). IR (neat) 3328, 2940, 2865, 1463, 1106, 882, 681 cm<sup>-1</sup>. <sup>1</sup>H NMR (400 MHz, CDCl<sub>3</sub>) δ 7.12 (s, 4H), 3.71 (t, *J* = 6 Hz, 2H), 3.59-3.53 (m, 1H), 2.80-2.69 (m, 1H), 2.69-2.60 (m, 3H), 1.88-1.70 (m, 4H), 1.58-1.44 (m, 3H), 1.09-1.06 (m, 21H), 0.95 (t, *J* = 7 Hz, 3H). <sup>13</sup>C NMR (100 MHz, CDCl<sub>3</sub>) δ 139.7, 139.3, 128.4, 128.2, 72.6, 62.6, 38.6, 34.7, 31.6, 31.6, 30.2, 18.0, 11.9, 9.8. HMRS (CI) calcd for C<sub>23</sub>H<sub>43</sub>O<sub>2</sub>Si [M+H]<sup>+</sup>: 379.3027. Found: 379.3033.

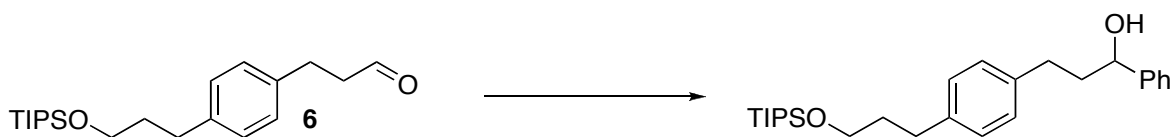

**1-Phenyl-3-(4-(3-(triisopropylsilyloxy)propyl)phenyl)propan-1-ol.** To a solution of **6** (2.08 g, 6.00 mmol) in ether (60 mL) at  $-78\text{ }^{\circ}\text{C}$ , was added dropwise a solution of phenylmagnesium bromide in ether (4.60 mL, 6.10 mmol) (internal temperature  $< 5\text{ }^{\circ}\text{C}$ ). The resulting mixture was warmed to  $0\text{ }^{\circ}\text{C}$  and stirred for 1 h. A saturated aqueous solution of  $\text{NH}_4\text{Cl}$  (30 mL) was added. The two layers were separated and the aqueous layer was washed with ether (3 x 50 mL). The combined organic layers were washed with water (40 mL), aqueous 1N HCl (40 mL), saturated aqueous  $\text{NaHCO}_3$  (40 mL) and saturated aqueous NaCl (40 mL), then dried over  $\text{Na}_2\text{SO}_4$ . The solvent was removed under reduced pressure and the residue was purified by flash chromatography (10% EtOAc/hexanes) to give a colorless oil (1.94 g, 76% y.).  $R_f$  0.45 (25% EtOAc/hexanes). IR (neat) 2942, 2865, 1463, 1104, 1064, 883  $\text{cm}^{-1}$ .  $^1\text{H}$  NMR (400 MHz,  $\text{CDCl}_3$ )  $\delta$  7.40-7.28 (m, 5H), 7.16 (s, 4H), 4.73-4.71 (m, 1H), 3.76 (t,  $J = 6\text{ Hz}$ , 2H), 2.80-2.64 (m, 4H), 2.21-2.01 (m, 3H), 1.93-1.86 (m, 2H), 1.12 (s, 21H).  $^{13}\text{C}$  NMR (100 MHz,  $\text{CDCl}_3$ )  $\delta$  144.5, 139.7, 138.8, 128.4, 128.2, 127.5, 125.8, 73.8, 62.5, 40.4, 34.6, 31.6, 31.5, 17.9, 11.9. HMRS (CI) calcd for  $\text{C}_{27}\text{H}_{42}\text{NaO}_2\text{Si}$   $[\text{M}+\text{H}]^+$ : 449.2846. Found: 449.2850.

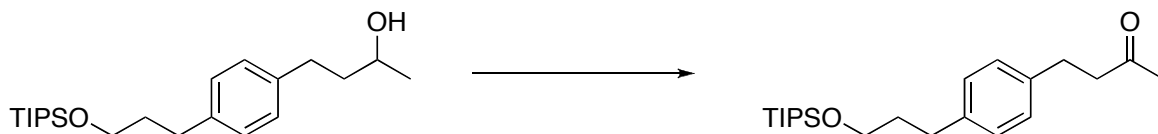

**4-(4-(3-(Triisopropylsilyloxy)propyl)phenyl)butan-2-one.** To a suspension of  $[\text{Pd}(\text{I}^i\text{Pr})(\text{OAc})_2 \cdot (\text{H}_2\text{O})]$  (449 mg, 0.710 mmol), tetrabutylammonium acetate (412 mg, 1.37 mmol), powder molecular sieves  $3\text{ \AA}$  (4.3 g), was added a solution of the alcohol (10.4 g, 28.6 mmol) in toluene (300 mL). The resulting mixture was stirred at  $60\text{ }^{\circ}\text{C}$  for 24 h under an atmosphere of oxygen. The mixture is filtered on silica gel and washed with pentane (3 x 70 mL), then with ether (3 x 100 mL) to recover the desired ketone. The solvent was removed under reduced pressure to provide the desired pur product as a yellow oil (10.2 g, 98% y.).  $R_f$  0.65 (25% EtOAc/hexanes). IR (neat) 2944, 2866, 1720, 1105  $\text{cm}^{-1}$ .  $^1\text{H}$  NMR (400 MHz,  $\text{CDCl}_3$ )  $\delta$  7.13 (d,  $J = 8\text{ Hz}$ , 2H), 7.10 (d,  $J = 8\text{ Hz}$ , 2H), 3.71 (t,  $J = 6\text{ Hz}$ , 2H), 2.90-2.84 (m, 2H), 2.77-2.65 (m, 4H), 2.14 (s, 3H), 1.89-1.80 (m, 2H), 1.09-1.07 (m, 21H).  $^{13}\text{C}$  NMR (100 MHz,  $\text{CDCl}_3$ )  $\delta$  208.0, 140.0, 138.0, 128.5, 128.0, 62.5, 45.2, 34.6, 31.5, 29.9, 29.2, 17.9, 11.9. Elemental analysis calcd for  $\text{C}_{22}\text{H}_{38}\text{O}_2\text{Si} \cdot \text{H}_2\text{O}$ : C, 69.42; H, 10.59 Found: C, 69.13; H, 10.79.

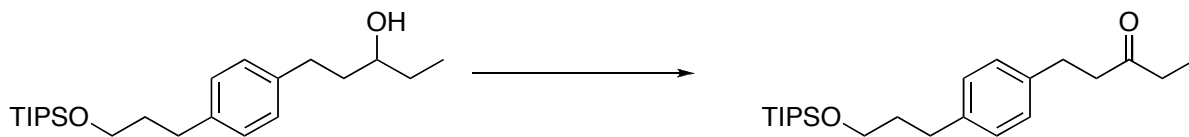

**1-(4-(3-(Triisopropylsilyloxy)propyl)phenyl)pentan-3-one.** To a suspension of  $[\text{Pd}(\text{I}^i\text{Pr})(\text{OAc})_2 \cdot (\text{H}_2\text{O})]$  (100 mg, 0.160 mmol), tetrabutylammonium acetate (103 mg, 0.34 mmol), powder molecular sieves  $3\text{ \AA}$  (924 mg), was added a solution of the alcohol (2.33 g, 6.16 mmol) in toluene (65 mL). The resulting mixture was stirred at  $60\text{ }^{\circ}\text{C}$  for 24 h under an atmosphere of oxygen. The mixture is filtered on silica gel and washed with pentane (3 x 30 mL), then with ether (3 x 40 mL) to recover the desired ketone. The solvent was removed under reduced pressure to provide the desired pur product as a yellow oil (2.29 g, 99% y.).  $R_f$  0.65 (25% EtOAc/hexanes). IR (neat) 2941, 2865, 1716, 1462, 1103, 882  $\text{cm}^{-1}$ .  $^1\text{H}$  NMR (400 MHz,  $\text{CDCl}_3$ )  $\delta$  7.13 (d,  $J = 9\text{ Hz}$ , 2H), 7.10 (d,  $J = 9\text{ Hz}$ , 2H), 3.72 (t,  $J = 6\text{ Hz}$ , 2H), 2.88 (t,  $J = 8\text{ Hz}$ , 2H), 2.74-2.65 (m, 4H), 2.41 (q,  $J = 7\text{ Hz}$ , 2H), 1.89-1.80 (m, 2H), 1.08-1.03 (m, 24H).  $^{13}\text{C}$  NMR (100 MHz,  $\text{CDCl}_3$ )  $\delta$  210.6, 140.0, 138.2, 128.5, 128.1, 62.5,

43.9, 36.0, 34.6, 31.6, 29.4, 17.9, 11.9, 7.6. HMRS (CI) calcd for  $C_{23}H_{40}NaO_2Si$   $[M+Na]^+$ : 399.2690. Found: 399.2696.

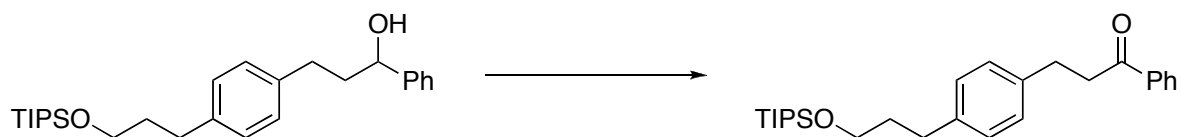

**1-Phenyl-3-(4-(3-(triisopropylsilyloxy)propyl)phenyl)propan-1-one.** To a suspension of  $[Pd(I\text{Pr})(OAc)_2 \cdot (H_2O)]$  (58 mg, 0.092 mmol), tetrabutylammonium acetate (75 mg, 0.070 mmol), powder molecular sieves  $3\text{\AA}$  (530 mg), was added a solution of the alcohol (1.50 g, 3.52 mmol) in toluene (35 mL). The resulting mixture was stirred at  $60\text{ }^\circ\text{C}$  for 24 h under an atmosphere of oxygen. The mixture is filtered on silica gel and washed with pentane (3 x 30 mL), then with ether (3 x 30 mL) to recover the desired ketone. The solvent was removed under reduced pressure to provide the desired product as a yellow oil (1.47 g, 98% y.).  $R_f$  0.40 (25% EtOAc/hexanes). IR (neat) 2941, 2864, 1687, 1463, 1449, 1097, 882  $\text{cm}^{-1}$ .  $^1\text{H}$  NMR (400 MHz,  $\text{CDCl}_3$ )  $\delta$  7.97 (dd,  $J = 8, 1$  Hz, 2H), 7.59-7.53 (m, 1H), 7.48-7.43 (m, 2H), 7.18 (d,  $J = 8$  Hz, 2H), 7.15 (d,  $J = 8$  Hz, 2H), 3.72 (t,  $J = 6$  Hz, 2H), 3.30 (t,  $J = 8$  Hz, 2H), 3.05 (t,  $J = 8$  Hz, 2H), 2.69 (t,  $J = 8$  Hz, 2H), 1.90-1.81 (m, 2H), 1.10-1.07 (m, 21H).  $^{13}\text{C}$  NMR (100 MHz,  $\text{CDCl}_3$ )  $\delta$  199.3, 140.1, 138.4, 136.8, 132.9, 128.5, 128.5, 128.2, 127.9, 62.5, 40.5, 34.7, 31.6, 29.6, 18.0, 11.9. HMRS (CI) calcd for  $C_{27}H_{41}O_2Si$   $[M+H]^+$ : 425.2870. Found: 425.2870.

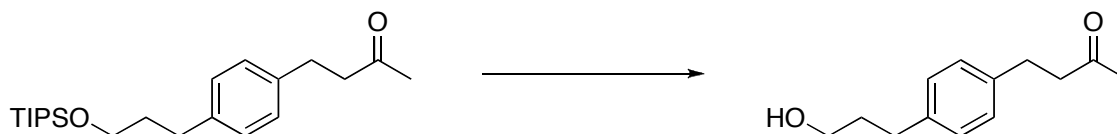

**4-(4-(3-Hydroxypropyl)phenyl)butan-2-one.** To a solution of the silyl ether (3.46 g, 9.54 mmol) in THF (50 mL), was added a solution of TBAF in THF (10.0 mL, 10.0 mmol). The resulting mixture was stirred at rt for 30 min. Aqueous 1N HCl (15 mL) was added, then the two layers were separated. The aqueous layer was washed with ether (3 x 40 mL). The combined organic layers were washed with water (75 mL), saturated aqueous  $\text{NaHCO}_3$  (75 mL) and saturated aqueous NaCl (75 mL), then dried over  $\text{Na}_2\text{SO}_4$ . The solvent was removed under reduced pressure and the residue was purified by flash chromatography (20% EtOAc/hexanes) to give a colorless oil (1.93 g, 98% y.).  $R_f$  0.10 (25% EtOAc/hexanes). IR (neat) 3387, 2935, 2864, 1710, 1515, 1363, 1055  $\text{cm}^{-1}$ .  $^1\text{H}$  NMR (400 MHz,  $\text{CDCl}_3$ )  $\delta$  7.10 (s, 4H), 3.65 (t,  $J = 6$  Hz, 2H), 2.87 (t,  $J = 7$  Hz, 2H), 2.74 (t,  $J = 7$  Hz, 2H), 2.66 (t,  $J = 8$  Hz, 2H), 2.13 (s, 3H), 1.90-1.80 (m, 3H).  $^{13}\text{C}$  NMR (100 MHz,  $\text{CDCl}_3$ )  $\delta$  208.1, 139.5, 138.3, 128.4, 128.2, 62.1, 45.1, 34.1, 31.5, 30.0, 29.2. HMRS (CI) calcd for  $C_{13}H_{19}O_2$   $[M+H]^+$ : 207.1380. Found: 207.1371.

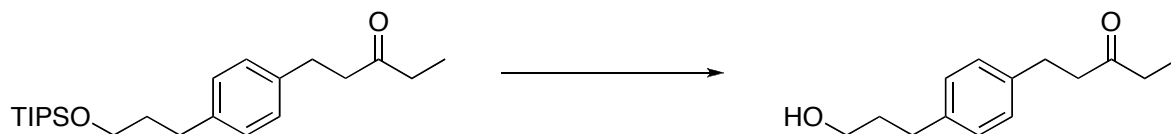

**1-(4-(3-Hydroxypropyl)phenyl)pentan-3-one.** To a solution of the silyl ether (2.29 g, 6.09 mmol) in THF (65 mL), was added a solution of TBAF in THF (6.10 mL, 6.10 mmol). The resulting mixture was stirred at rt for 45 min. Aqueous 1N HCl (10 mL) was added, then the two layers were separated. The aqueous layer was washed with ether (3 x 30 mL). The combined organic layers were washed with water (60 mL), saturated aqueous  $\text{NaHCO}_3$  (60 mL) and saturated aqueous NaCl (60 mL), then dried over  $\text{Na}_2\text{SO}_4$ . The solvent was removed under reduced pressure and the residue was purified by flash chromatography (20% EtOAc/hexanes) to give a yellowish oil (1.16 g, 87% y.).  $R_f$  0.10 (25%

EtOAc/hexanes). IR (neat) 3387, 2937, 1708, 1412, 1375, 1112, 1057  $\text{cm}^{-1}$ .  $^1\text{H}$  NMR (400 MHz,  $\text{CDCl}_3$ )  $\delta$  7.09 (d,  $J$  = 8 Hz, 2H), 7.06 (d,  $J$  = 8 Hz, 2H), 3.62 (t,  $J$  = 6 Hz, 2H), 2.89, (s, 1H), 2.83 (t,  $J$  = 8 Hz, 2H), 2.70-2.62 (m, 4H), 2.38 (q,  $J$  = 7 Hz, 2H), 1.87-1.80 (m, 2H), 1.01 (t,  $J$  = 7 Hz, 3H).  $^{13}\text{C}$  NMR (100 MHz,  $\text{CDCl}_3$ )  $\delta$  210.8, 139.4, 138.1, 128.2, 127.9, 61.6, 43.6, 35.7, 33.9, 31.3, 29.1, 7.4. HMRS (CI) calcd for  $\text{C}_{14}\text{H}_{21}\text{O}_2$   $[\text{M}+\text{H}]^+$ : 221.1536. Found: 221.1532.

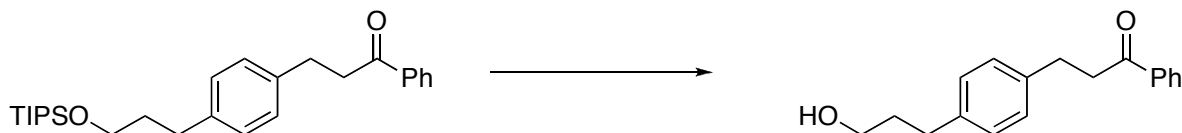

**3-(4-(3-Hydroxypropyl)phenyl)-1-phenylpropan-1-one.** To a solution of the silyl ether (1.47 g, 3.45 mmol) in THF (35 mL), was added a solution of TBAF in THF (3.50 mL, 3.50 mmol). The resulting mixture was stirred at rt for 45 min. Aqueous 1N HCl (10 mL) was added, then the two layers were separated. The aqueous layer was washed with ethyl acetate (3 x 25 mL). The combined organic layers were washed with water (30 mL), saturated aqueous  $\text{NaHCO}_3$  (30 mL) and saturated aqueous NaCl (30 mL), then dried over  $\text{Na}_2\text{SO}_4$ . The solvent was removed under reduced pressure and the residue was purified by flash chromatography (30% EtOAc/hexanes) to give a brown oil (588 mg, 63% y.).  $R_f$  0.10 (25% EtOAc/hexanes). IR (neat) 3378, 2941, 2864, 1684, 1449, 1056, 882, 837, 676  $\text{cm}^{-1}$ .  $^1\text{H}$  NMR (400 MHz,  $\text{CDCl}_3$ )  $\delta$  7.96 (d,  $J$  = 7 Hz, 2H), 7.58-7.53 (m, 1H), 7.47-7.42 (m, 2H), 7.18 (d,  $J$  = 8 Hz, 2H), 7.14 (d,  $J$  = 8 Hz, 2H), 3.67 (t,  $J$  = 6 Hz, 2H), 3.29 (t,  $J$  = 7 Hz, 2H), 3.04 (t,  $J$  = 7 Hz, 2H), 2.68 (t,  $J$  = 8 Hz, 2H), 2.01 (br s, 1H), 1.93-1.83 (m, 2H).  $^{13}\text{C}$  NMR (100 MHz,  $\text{CDCl}_3$ )  $\delta$  199.3, 139.5, 138.5, 136.6, 132.9, 128.5, 128.4, 128.3, 127.9, 62.1, 40.4, 34.1, 31.5, 29.6. HMRS (CI) calcd for  $\text{C}_{18}\text{H}_{20}\text{NaO}_2$   $[\text{M}+\text{Na}]^+$ : 291.1355. Found: 291.1359.

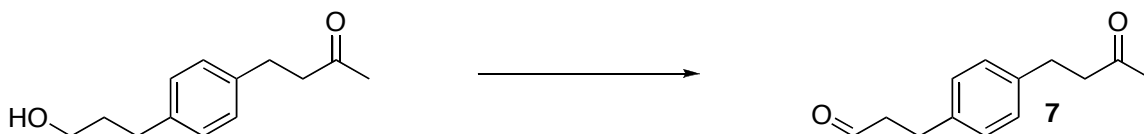

**3-(4-(3-Oxobutyl)phenyl)propanal (7).** To a solution of Dess Martin Periodinane (0.450 g, 1.07 mmol) in dichloromethane (4 mL), was added a solution of the alcohol (200 mg, 0.970 mmol) in dichloromethane (2 mL). The resulting mixture was stirred at rt for 60 min. Aqueous 10%  $\text{Na}_2\text{S}_2\text{O}_3$  (5 mL) and saturated aqueous  $\text{NaHCO}_3$  (5 mL) were added, and the resulting mixture was stirred until the two layers were colorless. The two layers were separated and the aqueous layer was washed with ether (3 x 10 mL). The combined organic layers were washed with water (20 mL) and saturated aqueous NaCl (20 mL), then dried over  $\text{Na}_2\text{SO}_4$ . The solvent was removed under reduced pressure to provide the desired pur product **7** as a colorless oil (198 mg, 100% y.).  $R_f$  0.25 (25% EtOAc/hexanes). IR (neat) 2924, 1714, 1516, 1361, 1161  $\text{cm}^{-1}$ .  $^1\text{H}$  NMR (400 MHz,  $\text{CDCl}_3$ )  $\delta$  9.80, (s, 1H), 7.10 (s, 4H), 2.91 (t,  $J$  = 8 Hz, 2H), 2.85 (t,  $J$  = 8 Hz, 2H), 2.77-2.71 (m, 4H), 2.13 (s, 3H).  $^{13}\text{C}$  NMR (100 MHz,  $\text{CDCl}_3$ )  $\delta$  207.9, 201.6, 138.8, 137.9, 128.4, 128.3, 45.2, 45.0, 30.0, 29.5, 27.5. HMRS (CI) calcd for  $\text{C}_{13}\text{H}_{15}\text{O}_2$   $[\text{M}-\text{H}]$ : 203.1077. Found: 203.1075.

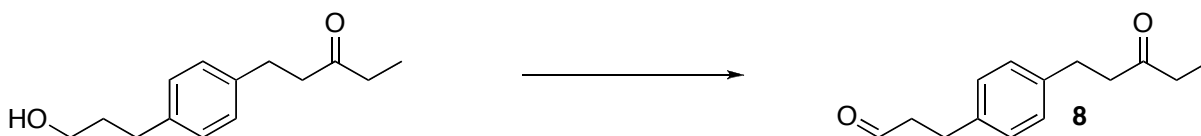

**3-(4-(3-Oxopentyl)phenyl)propanal (8).** To a solution of Dess Martin Periodinane (0.22 g, 0.50 mmol) in dichloromethane (5 mL), was added a solution of the alcohol (100 mg, 0.450 mmol) in dichloromethane (5 mL). The resulting mixture was stirred at rt for 60 min. Aqueous 10%  $\text{Na}_2\text{S}_2\text{O}_3$  (5 mL) and saturated aqueous  $\text{NaHCO}_3$  (5 mL) were added, and the resulting mixture was stirred until the



two layers were colorless. The two layers were separated and the aqueous layer was washed with ether (3 x 10 mL). The combined organic layers were washed with water (20 mL) and saturated aqueous NaCl (20 mL), then dried over Na<sub>2</sub>SO<sub>4</sub>. The solvent was removed under reduced pressure to provide the desired pur product **8** as a colorless oil (98 mg, 100% y.). *R*<sub>f</sub> 0.30 (25% EtOAc/hexanes). IR (neat) 2938, 1710, 1518, 1412, 1372, 1113, 823 cm<sup>-1</sup>. <sup>1</sup>H NMR (400 MHz, CDCl<sub>3</sub>) δ 9.75 (s, 1H), 7.07 (s, 4H), 2.89-2.81 (m, 4H), 2.73-2.60 (m, 4H), 2.37 (q, *J* = 7 Hz, 2H), 1.00 (t, *J* = 7 Hz, 3H). <sup>13</sup>C NMR (100 MHz, CDCl<sub>3</sub>) δ 210.4, 201.4, 138.8, 137.7, 128.2, 128.1, 44.9, 43.5, 35.7, 29.0, 27.3, 7.4. HMRS (CI) calcd for C<sub>14</sub>H<sub>18</sub>NaO<sub>2</sub> [M+Na]<sup>+</sup>: 235.1329. Found: 235.1327.

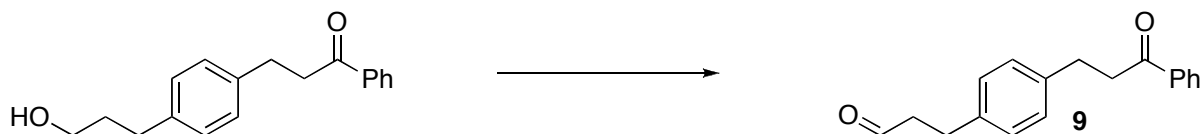

**3-(4-(3-Oxo-3-phenylpropyl)phenyl)propanal (9).** To a solution of Dess Martin Periodinane (173 mg, 0.410 mmol) in dichloromethane (5 mL), was added a solution of the alcohol (100 mg, 0.370 mmol) in dichloromethane (5 mL). The resulting mixture was stirred at rt for 60 min. Aqueous 10% Na<sub>2</sub>S<sub>2</sub>O<sub>3</sub> (5 mL) and saturated aqueous NaHCO<sub>3</sub> (5 mL) were added, and the resulting mixture was stirred until the two layers were colorless. The two layers were separated and the aqueous layer was washed with ether (3 x 10 mL). The combined organic layers were washed with water (20 mL) and saturated aqueous NaCl (20 mL), then dried over Na<sub>2</sub>SO<sub>4</sub>. The solvent was removed under reduced pressure to provide the desired pur product **9** as an amber oil (98 mg, 100% y.). *R*<sub>f</sub> 0.25 (25% EtOAc/hexanes). IR (neat) 2926, 1720, 1682, 1448, 1203, 909, 730 cm<sup>-1</sup>. <sup>1</sup>H NMR (400 MHz, CDCl<sub>3</sub>) δ 9.81 (s, 1H), 7.96 (d, *J* = 7 Hz, 2H), 7.58-7.53 (m, 1H), 7.47-7.42 (m, 2H), 7.19 (d, *J* = 8 Hz, 2H), 7.13 (d, *J* = 8 Hz, 2H), 3.29 (t, *J* = 7 Hz, 2H), 3.04 (t, *J* = 8 Hz, 2H), 2.93 (t, *J* = 7 Hz, 2H), 2.76 (t, *J* = 7.5 Hz, 2H). <sup>13</sup>C NMR (100 MHz, CDCl<sub>3</sub>) δ 201.6, 199.1, 139.1, 137.9, 136.6, 132.9, 128.5, 128.5, 128.3, 127.9, 45.2, 40.3, 29.5, 27.5. HMRS (CI) calcd for C<sub>18</sub>H<sub>19</sub>O<sub>2</sub> [M+H]<sup>+</sup>: 267.1380. Found: 267.1380.

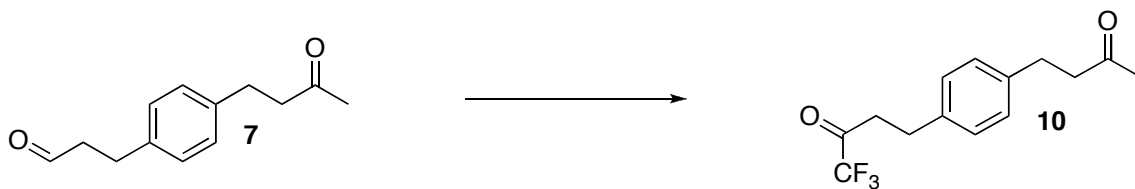

**1,1,1-Trifluoro-4-(4-(3-oxobutyl)phenyl)butan-2-one (10).** To a solution of aldehyde **7** (682 mg, 3.34 mmol) in THF (20 mL) was added TMSCF<sub>3</sub> (255 μL, 1.68 mmol). The resulting mixture was stirred for 1 h, before a second addition of TMSCF<sub>3</sub> (255 μL, 1.68 mmol), followed by a solution of TBAF in THF (57 μL, 0.057 mmol). The resulting mixture was stirred for another 2 h, then aqueous 1N HCl (2 mL) was added. After 30 min of stirring, the two layers were separated and the aqueous layer was washed with ether (3 x 10 mL). The combined organic layers were washed with water (10 mL), aqueous saturated solution of NaHCO<sub>3</sub> (10 mL) and saturated aqueous NaCl (10 mL), then dried over MgSO<sub>4</sub>. The solvent was removed under reduced pressure and the crude mixture was used directly in the next step. To a solution of Dess Martin Periodinane (4.72 g mg, 11.1 mmol) in dichloromethane (20 mL), was added a solution of the crude alcohol in dichloromethane (10 mL). The resulting mixture was stirred at rt for 60 min. Aqueous 10% Na<sub>2</sub>S<sub>2</sub>O<sub>3</sub> (10 mL) and saturated aqueous NaHCO<sub>3</sub> (10 mL) were added, and the resulting mixture was stirred until the two layers were colorless. The two layers were separated and the aqueous layer was washed with ether (3 x 25 mL). The combined organic layers were washed with water (30 mL) and saturated aqueous NaCl (30 mL), then dried over MgSO<sub>4</sub>. The solvent was removed under reduced pressure and the residue was purified by flash chromatography (20% EtOAc/hexanes) to give **10** as a colorless oil (405 mg, 47% y.). *R*<sub>f</sub> 0.15 (10% EtOAc/hexanes). IR (neat) 3387, 2832, 1705, 1362, 1166, 1053 cm<sup>-1</sup>. <sup>1</sup>H NMR (300 MHz, CDCl<sub>3</sub>) δ 7.11 (s, 4H), 3.02 (t, *J*

= 7 Hz, 2H), 2.94 (t,  $J$  = 7 Hz, 2H), 2.85 (t,  $J$  = 7.5 Hz, 2H), 2.74 (t,  $J$  = 7.5 Hz, 2H), 2.13 (s, 3H).  $^{13}\text{C}$  NMR (100 MHz,  $\text{CDCl}_3$ )  $\delta$  208.0, 190.6 (q,  $J$  = 35 Hz), 139.2, 136.9, 128.5, 128.2, 115.4 (q,  $J$  = 290 Hz), 44.9, 37.9, 29.9, 29.1, 27.7.  $^{19}\text{F}$  NMR (282 MHz,  $\text{CDCl}_3$ )  $\delta$  -79.6. HMRS (CI) calcd for  $\text{C}_{14}\text{H}_{16}\text{F}_3\text{O}_2$   $[\text{M}+\text{H}]^+$ : 273.1097. Found: 273.1102.

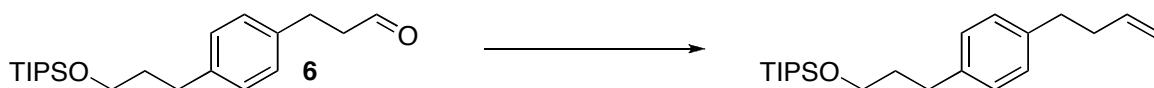

**(3-(4-(But-3-enyl)phenyl)propoxy)triisopropylsilane.** To a solution of chlorotris(triphenylphosphine)rhodium (67 mg, 0.072 mmol) and triphenylphosphine (829 mg, 3.16 mmol) in THF (20 mL), was added 2-propanol (250  $\mu\text{L}$ , 3.26 mmol) followed by the aldehyde **6** (1.00 g, 2.88 mmol). To the resulting red mixture, was then added a solution of trimethylsilyldiazomethane in THF (1.20 mL, 4.15 mmol). Gas evolution was observed and the resulting dark orange mixture was stirred at room temperature. After 4 hours, the solvent was removed under reduced pressure and the residue was purified by flash chromatography (2% EtOAc/hexanes) to give a colorless oil (847 mg, 85% y.).  $R_f$  0.75 (10% EtOAc/hexanes). IR (neat) 2942, 2866, 1464, 1106, 882, 681  $\text{cm}^{-1}$ .  $^1\text{H}$  NMR (400 MHz,  $\text{CDCl}_3$ )  $\delta$  7.19 (s, 4H), 5.96 (ddt,  $J$  = 17, 10, 7, 1H), 5.13 (d,  $J$  = 17 Hz, 1H), 5.06 (d,  $J$  = 10 Hz, 1H), 3.79 (t,  $J$  = 6 Hz, 2H), 2.76 (t,  $J$  = 8 Hz, 4H), 2.47-2.40 (m, 2H), 1.97-1.88 (m, 2H), 1.16 (s, 21H).  $^{13}\text{C}$  NMR (100 MHz,  $\text{CDCl}_3$ )  $\delta$  139.7, 139.0, 138.1, 128.3, 128.2, 114.7, 62.6, 35.6, 34.9, 34.7, 31.7, 18.0, 12.0. HMRS (CI) calcd for  $\text{C}_{22}\text{H}_{39}\text{OSi}$   $[\text{M}+\text{H}]^+$ : 347.2765. Found: 347.2766.

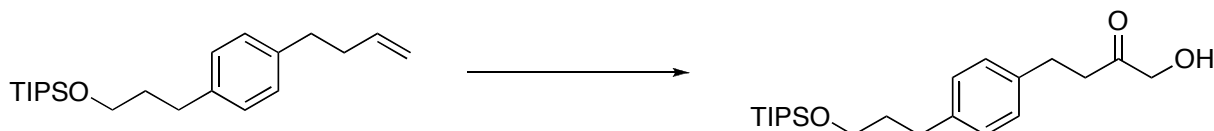

**1-Hydroxy-4-(4-(3-(triisopropylsilyloxy)propyl)phenyl)butan-2-one.** To a solution of olefin (4.00 g, 11.6 mmol) in acetone (95 mL), water (21 mL) and acetic acid (4.5 mL), was added dropwise a solution of  $\text{KMnO}_4$  (2.92 g, 18.5 mmol) in acetone (35 mL) and water (12 mL). The resulting mixture was stirred at room temperature until completion (3 hours). EtOH was added until effervescence stopped. The mixture was filtered through a pad of Celite<sup>®</sup> and washed with ether. The solvent was removed under reduced pressure. The filtrate was diluted with ether and washed with saturated aqueous  $\text{NaHCO}_3$  until pH = 8 and saturated aqueous  $\text{NaCl}$  (100 mL), then dried over  $\text{Na}_2\text{SO}_4$ . The solvent was removed under reduced pressure and the residue was purified by flash chromatography (20% EtOAc/hexanes) to give a colorless oil (3.01 g, 69% y.).  $R_f$  0.30 (25% EtOAc/hexanes). IR (neat) 3442, 2941, 2865, 1720, 1563, 1102, 1067, 882, 679  $\text{cm}^{-1}$ .  $^1\text{H}$  NMR (400 MHz,  $\text{CDCl}_3$ )  $\delta$  7.14 (d,  $J$  = 8 Hz, 2H), 7.09 (d,  $J$  = 8 Hz, 2H), 4.19 (d,  $J$  = 4 Hz, 2H), 3.72 (t,  $J$  = 6 Hz, 2H), 3.17 (t,  $J$  = 4 Hz, 1H), 2.94 (t,  $J$  = 8 Hz, 2H), 2.74-2.67 (m, 4H), 1.89-1.81 (m, 2H), 1.11-1.07 (m, 21H).  $^{13}\text{C}$  NMR (100 MHz,  $\text{CDCl}_3$ )  $\delta$  208.8, 140.4, 137.2, 128.6, 128.0, 68.2, 62.4, 39.9, 34.5, 31.5, 29.1, 17.9, 11.9. HMRS (CI) calcd for  $\text{C}_{22}\text{H}_{39}\text{O}_3\text{Si}$   $[\text{M}+\text{H}]^+$ : 379.2663. Found: 379.2658.

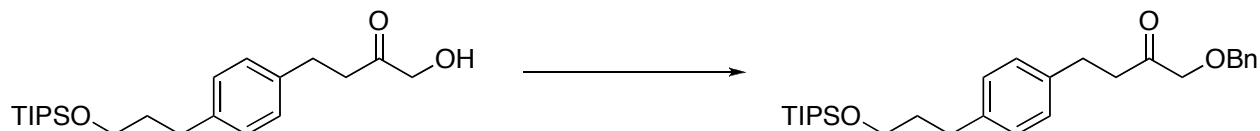

**1-(Benzyloxy)-4-(4-(3-(triisopropylsilyloxy)propyl)phenyl)butan-2-one.** To a solution of the alcohol (315 mg, 0.830 mmol) in mixture of cyclohexane (6.5 mL) and dichloromethane (3.5 mL), was added benzyl trichloroacetimidate (200  $\mu\text{L}$ , 1.08 mmol), followed by freshly distilled triflic acid (15  $\mu\text{L}$ , 0.17 mmol). The resulting mixture was stirred for 30 min. The mixture was then filtered and the filtrate was washed with ethyl acetate (3 x 10 mL). The combined organic layers were washed with saturated aqueous  $\text{NaHCO}_3$  (10 mL), then dried over  $\text{Na}_2\text{SO}_4$ . The solvent was removed under reduced pressure

and the residue was purified by flash chromatography (8% EtOAc/hexanes) to give a colorless oil (206 mg, 53% y.).  $R_f$  0.50 (25% EtOAc/hexanes). IR (neat) 2941, 2864, 1721, 1463, 1101, 910, 882, 734  $\text{cm}^{-1}$ .  $^1\text{H}$  NMR (400 MHz,  $\text{CDCl}_3$ )  $\delta$  7.40-7.33 (m, 5H), 7.15 (d,  $J$  = 8 Hz, 2H), 7.12 (d,  $J$  = 8 Hz, 2H), 4.58 (s, 2H), 4.04 (s, 2H), 3.75 (t,  $J$  = 6 Hz, 2H), 2.92 (t,  $J$  = 7 Hz, 2H), 2.81 (t,  $J$  = 7 Hz, 2H), 2.71 (t,  $J$  = 8 Hz, 2H), 1.91-1.84 (m, 2H), 1.13-1.08 (m, 21H).  $^{13}\text{C}$  NMR (100 MHz,  $\text{CDCl}_3$ )  $\delta$  207.9, 140.1, 137.9, 137.0, 128.5, 128.5, 128.3, 128.1, 127.8, 127.7, 75.0, 73.2, 62.4, 40.5, 34.6, 31.5, 28.8, 17.9, 11.9. HMRS (CI) calcd for  $\text{C}_{29}\text{H}_{45}\text{O}_3\text{Si}$   $[\text{M}+\text{H}]^+$ : 469.3132. Found: 469.3140.

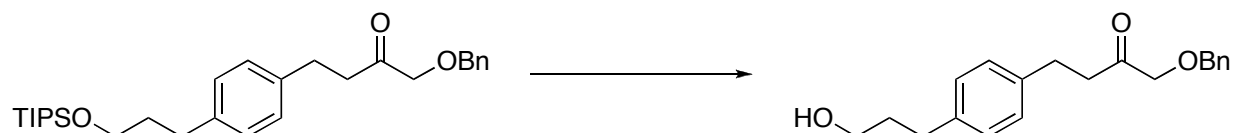

**1-(Benzyloxy)-4-(4-(3-hydroxypropyl)phenyl)butan-2-one.** To a solution of the silyl ether (2.62 g, 5.58 mmol) in MeCN (55 mL), was added a solution of HF (48% wt in  $\text{H}_2\text{O}$ ) (2.00 mL, 55.6 mmol). The resulting mixture was stirred at rt for 60 min. Saturated aqueous  $\text{NaHCO}_3$  (60 mL) was added, and the resulting mixture was stirred for 30 min. The two layers were then separated and the aqueous layer was washed with ether (3 x 35 mL). The combined organic layers were washed with water (35 mL), saturated aqueous  $\text{NaHCO}_3$  (35 mL) and saturated aqueous  $\text{NaCl}$  (35 mL), then dried over  $\text{Na}_2\text{SO}_4$ . The solvent was removed under reduced pressure and the residue was purified by flash chromatography (20% EtOAc/hexanes) to give a yellowish oil (1.40 g, 81% y.).  $R_f$  0.35 (25% EtOAc/hexanes). IR (neat) 3423, 2930, 2862, 1721, 1454, 1075, 738, 699  $\text{cm}^{-1}$ .  $^1\text{H}$  NMR (400 MHz,  $\text{CDCl}_3$ )  $\delta$  7.41-7.28 (m, 5H), 7.14 (s, 4H), 4.58 (s, 2H), 4.06 (s, 2H), 3.67 (t,  $J$  = 6 Hz, 2H), 2.92 (t,  $J$  = 7 Hz, 2H), 2.81 (t,  $J$  = 7 Hz, 2H), 2.70 (t,  $J$  = 8 Hz, 2H), 2.39 (br s, 1H), 1.93-1.86 (m, 2H).  $^{13}\text{C}$  NMR (100 MHz,  $\text{CDCl}_3$ )  $\delta$  207.9, 139.5, 137.9, 136.9, 128.3, 128.2, 128.0, 127.7, 127.6, 74.8, 73.0, 61.7, 40.3, 33.9, 31.4, 28.6. HMRS (CI) calcd for  $\text{C}_{20}\text{H}_{24}\text{NaO}_3$   $[\text{M}+\text{Na}]^+$ : 335.1618. Found: 335.1611.

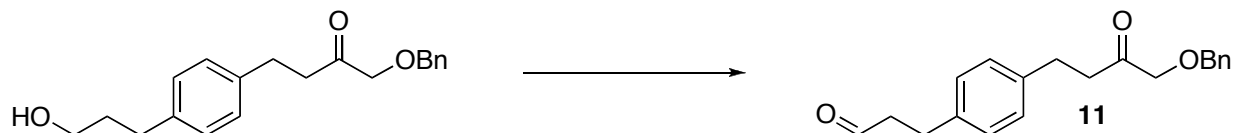

**3-(4-(4-(Benzyloxy)-3-oxobutyl)phenyl)propanal (11).** To a solution of Dess Martin Periodinane (601 mg, 1.42 mmol) in dichloromethane (5 mL), was added a solution of the alcohol (429 mg, 1.37 mmol) in dichloromethane (10 mL). The resulting mixture was stirred at rt for 60 min. Aqueous 10%  $\text{Na}_2\text{S}_2\text{O}_3$  (10 mL) and saturated aqueous  $\text{NaHCO}_3$  (10 mL) were added, and the resulting mixture was stirred until the two layers were colorless. The two layers were separated and the aqueous layer was washed with ether (3 x 20 mL). The combined organic layers were washed with water (20 mL), saturated aqueous  $\text{NaHCO}_3$  (20 mL) and saturated aqueous  $\text{NaCl}$  (20 mL), then dried over  $\text{Na}_2\text{SO}_4$ . The solvent was removed under reduced pressure to provide the desired pur product as a colorless oil (405 mg, 95% y.).  $R_f$  0.20 (25% EtOAc/hexanes). IR (neat) 2922, 2856, 1718, 1454, 1076, 739, 700  $\text{cm}^{-1}$ .  $^1\text{H}$  NMR (400 MHz,  $\text{CDCl}_3$ )  $\delta$  9.81 (t,  $J$  = 1 Hz, 1H), 7.36-7.30 (m, 5H), 7.10 (s, 4H), 4.56 (s, 2H), 4.02 (s, 2H), 2.94-2.85 (m, 4H), 2.80-2.73 (m, 4H).  $^{13}\text{C}$  NMR (100 MHz,  $\text{CDCl}_3$ )  $\delta$  207.8, 201.5, 138.7, 138.0, 137.0, 128.5, 128.4, 128.3, 127.9, 127.8, 75.0, 73.3, 45.1, 40.5, 28.7, 27.6. HMRS (CI) calcd for  $\text{C}_{20}\text{H}_{22}\text{NaO}_3$   $[\text{M}+\text{Na}]^+$ : 333.1461. Found: 333.1471.

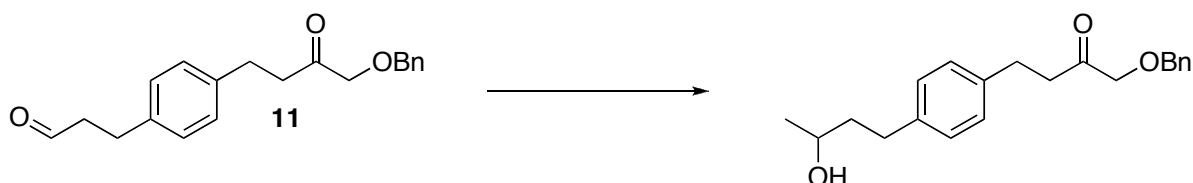

**1-(Benzyloxy)-4-(4-(3-hydroxybutyl)phenyl)butan-2-one.** To a solution of **11** (730 mg, 2.35 mmol) in ether (30 mL) at  $-100\text{ }^{\circ}\text{C}$ , was added dropwise a solution of methylmagnesium iodide in ether (900  $\mu\text{L}$ , 2.52 mmol) (internal temperature  $< 5\text{ }^{\circ}\text{C}$ ). The resulting mixture was warmed to  $-78\text{ }^{\circ}\text{C}$  and stirred for 30 min, before warming to  $-20\text{ }^{\circ}\text{C}$  for 30 min. A saturated aqueous solution of  $\text{NH}_4\text{Cl}$  (10 mL) was added at  $-20\text{ }^{\circ}\text{C}$ , then the mixture was allowed to warm to rt. The two layers were separated and the aqueous layer was washed with ether (3 x 10 mL). The combined organic layers were washed with water (15 mL), aqueous 1N HCl (15 mL), saturated aqueous  $\text{NaHCO}_3$  (15 mL) and saturated aqueous NaCl (15 mL), then dried over  $\text{Na}_2\text{SO}_4$ . The solvent was removed under reduced pressure and the residue was purified by flash chromatography (10% EtOAc/hexanes) to give a light yellow oil (208 mg, 27% y.).  $R_f$  0.10 (25% EtOAc/hexanes). IR (neat) 3408, 2925, 2861, 1722, 1514, 1454, 1372, 1077, 739  $\text{cm}^{-1}$ .  $^1\text{H}$  NMR (400 MHz,  $\text{CDCl}_3$ )  $\delta$  7.38-7.31 (m, 5H), 7.13-7.08 (m, 4H), 4.55 (s, 2H), 4.03 (s, 2H), 3.85-3.78 (m, 1H), 2.91-2.87 (m, 2H), 2.80-2.76 (m, 2H), 2.76-2.59 (m, 2H), 2.08 (br s, 1H), 1.78-1.71 (m, 2H), 1.22 (d,  $J = 6\text{ Hz}$ , 3H).  $^{13}\text{C}$  NMR (100 MHz,  $\text{CDCl}_3$ )  $\delta$  208.0, 139.8, 138.0, 137.0, 128.4, 128.3, 128.2, 127.9, 127.8, 75.0, 73.2, 67.3, 40.7, 40.5, 31.5, 28.7, 23.5. HMRS (CI) calcd for  $\text{C}_{21}\text{H}_{26}\text{NaO}_3$   $[\text{M}+\text{Na}]^+$ : 349.1779. Found: 349.1774.

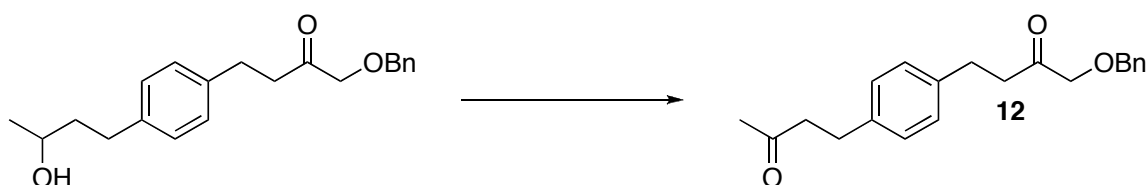

**1-(Benzyloxy)-4-(4-(3-oxobutyl)phenyl)butan-2-one (12).** To a solution of Dess Martin Periodinane (405 mg, 0.960 mmol) in dichloromethane (7 mL), was added a solution of the alcohol (208 mg, 0.640 mmol) in dichloromethane (3 mL). The resulting mixture was stirred at rt for 2 h. Aqueous 10%  $\text{Na}_2\text{S}_2\text{O}_3$  (3 mL) and saturated aqueous  $\text{NaHCO}_3$  (3 mL) were added, and the resulting mixture was stirred until the two layers were colorless. The two layers were separated and the aqueous layer was washed with ether (3 x 10 mL). The combined organic layers were washed with water (10 mL), saturated aqueous  $\text{NaHCO}_3$  (10 mL) and saturated aqueous NaCl (10 mL), then dried over  $\text{Na}_2\text{SO}_4$ . The solvent was removed under reduced pressure to provide the desired pur product **12** as colorless oil (200 mg, 96% y.).  $R_f$  0.20 (25% EtOAc/hexanes). IR (neat) 2923, 1715, 1516, 1366, 1159, 1077, 740, 699  $\text{cm}^{-1}$ .  $^1\text{H}$  NMR (400 MHz,  $\text{CDCl}_3$ )  $\delta$  7.35-7.30 (m, 5H), 7.09 (s, 4H), 4.55 (s, 1H), 4.02 (s, 2H), 2.89-2.83 (m, 4H), 2.79-2.71 (m, 4H), 2.13 (s, 3H).  $^{13}\text{C}$  NMR (100 MHz,  $\text{CDCl}_3$ )  $\delta$  207.9 (2C), 138.7, 138.5, 137.0, 128.4, 128.4, 128.3, 128.0, 127.8, 75.0, 73.3, 45.1, 40.5, 30.0, 29.2, 28.7. HMRS (CI) calcd for  $\text{C}_{21}\text{H}_{24}\text{NaO}_3$   $[\text{M}+\text{Na}]^+$ : 347.1616. Found: 347.1617.

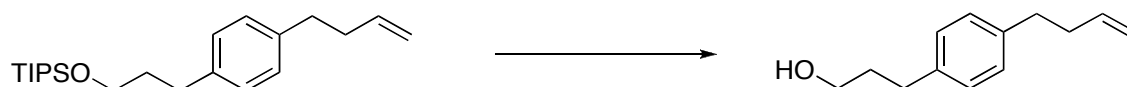

**3-(4-(But-3-enyl)phenyl)propan-1-ol.** To a solution of the silyl ether (8.11 g, 23.4 mmol) in THF (250 mL), was added a solution of TBAF in THF (24.0 mL, 24.0 mmol). The resulting mixture was stirred at rt for 60 min. Aqueous 1N HCl (30 mL) was added, then the two layers were separated. The aqueous layer was washed with ethyl acetate (3 x 75 mL). The combined organic layers were washed with water (80 mL), saturated aqueous  $\text{NaHCO}_3$  (80 mL) and saturated aqueous NaCl (80 mL), then dried over  $\text{Na}_2\text{SO}_4$ . The solvent was removed under reduced pressure and the residue was purified by

flash chromatography (25% EtOAc/hexanes) to give a colorless oil (4.10 g, 92% y.).  $R_f$  0.25 (25% EtOAc/hexanes). IR 3325, 2927, 2857, 1514, 1438, 1042, 910, 845  $\text{cm}^{-1}$ .  $^1\text{H}$  NMR (400 MHz,  $\text{CDCl}_3$ )  $\delta$  7.17 (s, 4H), 5.93 (ddt,  $J = 17, 10, 7$ , 1H), 5.11 (d,  $J = 17$  Hz, 2H), 5.04 (d,  $J = 17$  Hz, 2H), 3.69 (t,  $J = 6$  Hz, 2H), 2.76-2.69 (m, 4H), 2.61 (br s, 1H), 2.46-2.38 (m, 2H), 1.97-1.87 (m, 2H).  $^{13}\text{C}$  NMR (100 MHz,  $\text{CDCl}_3$ )  $\delta$  139.1, 139.1, 138.0, 128.2, 128.1, 114.7, 61.9, 35.4, 34.7, 34.0, 31.5. HRMS (CI) calcd for  $\text{C}_{13}\text{H}_{19}\text{O}$   $[\text{M}+\text{H}]^+$ : 191.1425. Found: 191.1430.

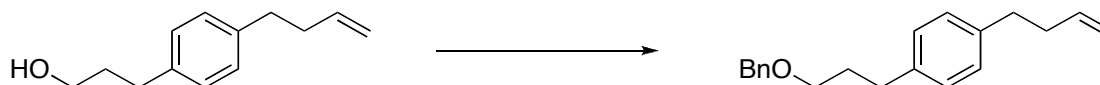

**1-(3-(Benzyloxy)propyl)-4-(but-3-enyl)benzene.** To a solution of sodium hydride (589 mg, 24.5 mmol) in THF (50 mL), was added a solution of the alcohol (4.02 g, 21.1 mmol) in THF (170 mL), followed by benzyl bromide (3.60 mL, 29.7 mmol), then tetrabutylammonium iodide (215 mg, 0.57 mmol). The resulting mixture was stirred at rt for 45 min. Aqueous 10%  $\text{K}_2\text{CO}_3$  (50 mL) was added, then the two layers were separated. The aqueous layer was washed with ethyl acetate (3 x 50 mL). The combined organic layers were washed with water (60 mL), saturated aqueous  $\text{NaHCO}_3$  (60 mL) and saturated aqueous  $\text{NaCl}$  (60 mL), then dried over  $\text{Na}_2\text{SO}_4$ . The solvent was removed under reduced pressure and the residue was purified by flash chromatography (5% EtOAc/hexanes) to give a yellow oil (5.69 g, 96% y.).  $R_f$  0.75 (25% EtOAc/hexanes). IR (neat) 2925, 2854, 1453, 1100, 910, 734, 695  $\text{cm}^{-1}$ .  $^1\text{H}$  NMR (400 MHz,  $\text{CDCl}_3$ )  $\delta$  7.37-7.30 (m, 5H), 7.11 (s, 4H), 5.88 (ddt,  $J = 17, 10, 7$  Hz, 1H), 5.09-4.97 (m, 2H), 4.52 (s, 2H), 3.50 (t,  $J = 6$  Hz, 2H), 2.72-2.66 (m, 4H), 2.41-2.34 (m, 2H), 1.99-1.89 (m, 2H).  $^{13}\text{C}$  NMR (100 MHz,  $\text{CDCl}_3$ )  $\delta$  139.3, 139.1, 138.5, 138.2, 128.3, 128.3, 128.3, 127.6, 127.4, 114.7, 72.8, 69.5, 35.5, 34.9, 31.9, 31.3. HMRS (CI) calcd for  $\text{C}_{20}\text{H}_{25}\text{O}$   $[\text{M}+\text{H}]^+$ : 281.1900. Found: 281.1892.

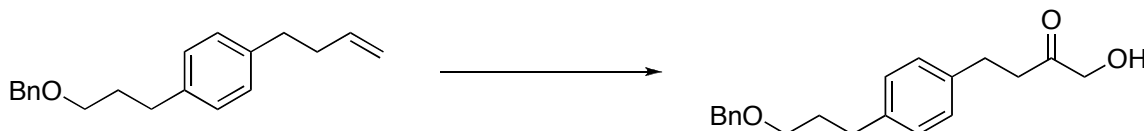

**4-(4-(3-(Benzyloxy)propyl)phenyl)-1-hydroxybutan-2-one.** To a solution of the alkene (4.00 g, 14.3 mmol) in acetone (120 mL), water (27 mL) and acetic acid (5.70 mL), was added dropwise a solution of  $\text{KMnO}_4$  (3.60 g, 22.8 mmol) in acetone (45 mL) and water (60 mL). The resulting mixture was stirred at room temperature for 2 hours. EtOH was added until effervescence stopped. The mixture was filtered through a pad of Celite<sup>®</sup> and washed with ether. The solvent was removed under reduced pressure. The filtrate was diluted with ether and washed with saturated aqueous  $\text{NaHCO}_3$  until pH = 8 and saturated aqueous  $\text{NaCl}$  (100 mL), then dried with  $\text{Na}_2\text{SO}_4$ . The solvent was removed under reduced pressure and the residue was purified by flash chromatography (20% EtOAc/hexanes) to give a colorless oil (3.20 g, 72% y.).  $R_f$  0.10 (25% EtOAc/hexanes). IR (neat) 3424, 2928, 2856, 1717, 1453, 1364, 1099, 1068, 737, 698  $\text{cm}^{-1}$ .  $^1\text{H}$  NMR (400 MHz,  $\text{CDCl}_3$ )  $\delta$  7.37-7.29 (m, 5H), 7.12 (d,  $J = 8$  Hz, 2H), 7.09 (d,  $J = 8$  Hz, 2H), 4.52 (s, 2H), 4.19 (s, 2H), 3.50 (t,  $J = 6$  Hz, 2H), 3.21 (br s, 1H), 2.94 (t,  $J = 8$  Hz, 2H), 2.73-2.68 (m, 4H), 1.97-1.90 (m, 2H).  $^{13}\text{C}$  NMR (100 MHz,  $\text{CDCl}_3$ )  $\delta$  208.9, 140.0, 138.4, 137.4, 128.6, 128.2, 128.0, 127.5, 127.4, 72.8, 69.3, 68.2, 39.8, 31.8, 31.2, 29.0. HMRS (CI) calcd for  $\text{C}_{20}\text{H}_{25}\text{O}_3$   $[\text{M}+\text{H}]^+$ : 313.1798. Found: 313.1790.

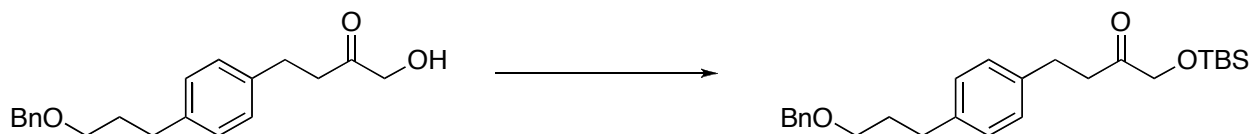

**4-(4-(3-(Benzyloxy)propyl)phenyl)-1-(tert-butyldimethylsilyloxy)butan-2-one.** To a mixture of imidazole (751 mg, 10.9 mmol), 4-dimethylaminopyridine (57 mg, 0.47 mmol) and *t*-butyldimethylsilyl chloride (1.61 g, 10.4 mmol), was added a solution of the alcohol (2.27 g, 7.27 mmol) in DMF (120 mL). The resulting mixture was stirred for 2 min at rt. Saturated aqueous ammonium chloride (40 mL) was then added and the two layers were separated. The aqueous layer was washed with ether (3 x 40 mL). The combined organic layers were washed with water (50 mL), saturated aqueous NaHCO<sub>3</sub> (50 mL), saturated aqueous NaCl (50 mL), then dried over Na<sub>2</sub>SO<sub>4</sub>. The solvent was removed under reduced pressure to provide the desired pur product as yellowish oil (3.00 g, 97% y.). *R*<sub>f</sub> 0.60 (25% EtOAc/hexanes). IR (neat) 2928, 2856, 1719, 1679, 1253, 1100, 836, 778 cm<sup>-1</sup>. <sup>1</sup>H NMR (400 MHz, CDCl<sub>3</sub>) δ 7.38-7.29 (m, 5H), 7.12 (s, 4H), 4.53 (s, 2H), 4.17 (s, 2H), 3.51 (t, *J* = 6 Hz, 2H), 2.95-2.89 (m, 2H), 2.85-2.81 (m, 2H), 2.71 (t, *J* = 8 Hz, 2H), 1.98-1.91 (m, 2H), 0.94 (s, 9H), 0.09 (s, 6H). <sup>13</sup>C NMR (75 MHz, CDCl<sub>3</sub>) δ 210.0, 139.6, 138.4, 138.2, 128.5, 128.2, 128.1, 127.5, 127.4, 72.8, 69.4, 69.3, 39.8, 31.8, 31.3, 28.8, 25.7, 18.2, -5.5. HMRS (CI) calcd for C<sub>26</sub>H<sub>38</sub>NaO<sub>3</sub>Si [M+Na]<sup>+</sup>: 449.2482. Found: 449.2478.

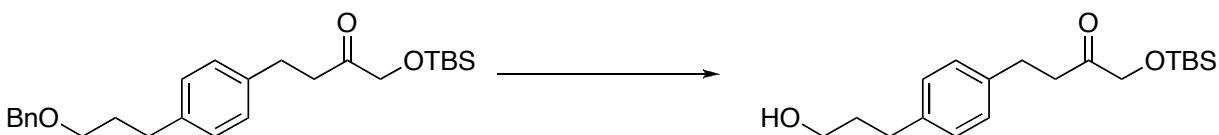

**1-(tert-Butyldimethylsilyloxy)-4-(4-(3-hydroxypropyl)phenyl)butan-2-one.** A solution of the benzyl ether (257 mg, 0.600 mmol) and palladium 10% on carbon (72 mg, 0.067 mmol) in ethyl acetate (10 mL) was stirred under an atmosphere of hydrogen for 1 h. The mixture was filtered through Celite, and washed with ether (3 x 20 L). The solvent was removed under reduced pressure and the residue was purified by flash chromatography (15% EtOAc/hexanes) to give a colorless oil (174 mg, 86% y.). *R*<sub>f</sub> 0.30 (25% EtOAc/hexanes). IR (neat) 2930, 2858, 2252, 1716, 1256, 1105, 907, 839, 731 cm<sup>-1</sup>. <sup>1</sup>H NMR (400 MHz, CDCl<sub>3</sub>) δ 7.12 (d, *J* = 8 Hz, 2H), 7.08 (d, *J* = 8 Hz, 2H), 4.18 (d, *J* = 4 Hz, 2H), 3.63 (t, *J* = 6 Hz, 2H), 3.23 (t, *J* = 5 Hz, 1H), 2.93 (t, *J* = 8 Hz, 2H), 2.71 (t, *J* = 8 Hz, 2H), 2.64 (t, *J* = 8 Hz, 2H), 1.85-1.78 (m, 2H), 0.91 (s, 9H), 0.06 (s, 6H). <sup>13</sup>C NMR (100 MHz, CDCl<sub>3</sub>) δ 208.9, 140.2, 137.3, 128.5, 128.0, 68.2, 62.2, 39.8, 34.3, 31.5, 29.0, 25.8, 18.2, -5.37. HMRS (CI) calcd for C<sub>19</sub>H<sub>33</sub>O<sub>3</sub>Si [M+H]<sup>+</sup>: 337.2193. Found: 337.2188.

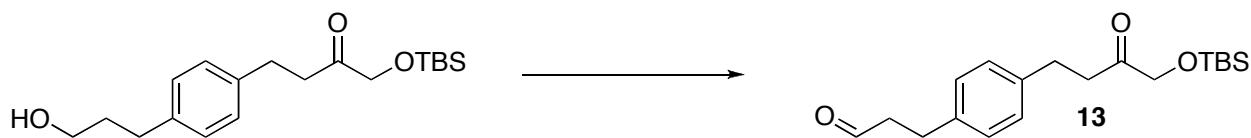

**3-(4-(4-(tert-butyldimethylsilyloxy)-3-oxobutyl)phenyl)propanal (13).** To a solution of Dess Martin Periodinane (138 mg, 0.33 mmol) in dichloromethane (4 mL), was added a solution of the alcohol (109 mg, 0.32 mmol) in dichloromethane (2 mL). The resulting mixture was stirred at rt for 1 h. Aqueous 10% Na<sub>2</sub>S<sub>2</sub>O<sub>3</sub> (3 mL) and saturated aqueous NaHCO<sub>3</sub> (3 mL) were added, and the resulting mixture was stirred until the two layers were colorless. The two layers were separated and the aqueous layer was washed with ether (3 x 10 mL). The combined organic layers were washed with water (10 mL), saturated aqueous NaHCO<sub>3</sub> (10 mL) and saturated aqueous NaCl (10 mL), then dried over Na<sub>2</sub>SO<sub>4</sub>. The solvent was removed under reduced pressure to provide the desired pur product as colorless oil (84 mg, 78% y.). *R*<sub>f</sub> 0.40 (25% EtOAc/hexanes). IR (neat) 2928, 2856, 1719, 1258, 1102, 836, 779 cm<sup>-1</sup>. <sup>1</sup>H NMR (400 MHz, CDCl<sub>3</sub>) δ 9.80 (t, *J* = 1 Hz, 1H), 7.10 (s, 4H), 4.13 (s, 2H), 2.93-2.85 (m, 4H), 2.82-2.72 (m, 4H), 0.90 (s, 9H), 0.06 (s, 6H). <sup>13</sup>C NMR (100 MHz, CDCl<sub>3</sub>) δ 210.0, 201.5, 138.8, 137.9, 128.4, 128.3, 69.3, 45.1, 39.7, 28.7, 27.5, 25.6, 18.2, -5.60. HMRS (CI) calcd for C<sub>19</sub>H<sub>30</sub>NaO<sub>3</sub>Si [M+Na]<sup>+</sup>: 357.1856. Found: 357.1854. Elemental analysis calcd for C<sub>19</sub>H<sub>30</sub>O<sub>3</sub>Si·H<sub>2</sub>O: C, 64.73; H, 9.15; Found: C, 64.62; H, 9.08.

## General Procedure for the Chemoselective Methylenation

### Method A: Catalytic Methylenation using Wilkinson's Catalyst.

To a solution of chlorotris(triphenylphosphine)rhodium (23 mg, 0.025 mmol) and triphenylphosphine (288 mg, 1.10 mmol) in THF (10 mL), was added 2-propanol (75.0  $\mu$ L, 1.00 mmol) followed by the aldehyde (1.00 mmol). To the resulting red mixture, was then added a solution of trimethylsilyldiazomethane in THF (0.82 mL, 1.40 mmol). Gas evolution was observed and the resulting dark orange mixture was stirred at room temperature. After 2 hours, the solvent was removed under reduced pressure and the residue was purified by flash chromatography on silica gel.

### Method B: Catalytic Methylenation using CuCl as Catalyst.

To a solution of CuCl (5 mg, 0.05 mmol) and triphenylphosphine (288 mg, 1.10 mmol) in THF (10 mL (0.1 M)) at 25 °C, was added 2-propanol (84  $\mu$ L, 1.1 mmol) followed by the aldehyde (1.00 mmol) and the trimethylsilyldiazomethane ether solution (0.82 mL, 1.40 mmol). The resulting mixture was then heated at 60 °C and the reaction was stirred until the reaction showed completion by TLC analysis. Aqueous 3% H<sub>2</sub>O<sub>2</sub> (10 mL) was added and the organic layer was washed with ether (3 x 20 mL). The combined organic layers were washed with brine (2 x 20 mL), then dried over MgSO<sub>4</sub>. The solvent was removed under reduced pressure and the crude alkene was purified by flash chromatography on silica gel.

### Method C: Wittig Procedure for the Methylenation

To a solution of methyltriphenylphosphonium bromide (393 mg, 1.10 mmol) in THF (10 mL), was added sodium hexamethyldisilazide (202 mg, 1.10 mmol). The resulting yellow mixture was heated at 60 °C and stirred for 2 hours. After cooling to room temperature, the aldehyde (1.00 mmol) was then added and the solution was stirred at room temperature. After completion of the reaction, the solvent was removed under reduced pressure and the crude alkene was purified by flash chromatography on silica gel.

## Characterization of Alkene Products

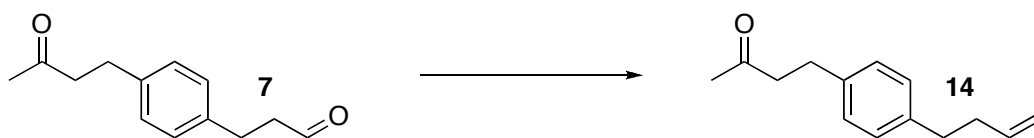

**4-(4-(But-3-enyl)phenyl)butan-2-one (14).** The title compound was prepared from 3-(4-(3-oxobutyl)phenyl)propanal (**7**) (106 mg, 0.52 mmol) according to the general procedure **A** (reaction time 2 h). The desired alkene **14** (90 mg, 85%) was obtained as a colorless oil after flash chromatography (5% EtOAc/hexanes). *R<sub>f</sub>* 0.50 (25% EtOAc/hexanes). IR (neat) 2925, 1716, 1515, 1364, 160 cm<sup>-1</sup>. <sup>1</sup>H NMR (400 MHz, CDCl<sub>3</sub>)  $\delta$  7.11 (s, 4H), 5.86 (ddt, *J* = 17, 10, 7 Hz, 1H), 5.04 (d, *J* = 17 Hz, 1H), 4.98 (d, *J* = 10 Hz, 1H), 2.89-2.85 (m, 2H), 2.77-2.73 (m, 2H), 2.70-2.66 (m, 2H), 2.38-2.33 (m, 2H), 2.14 (s, 3H). <sup>13</sup>C NMR (100 MHz, CDCl<sub>3</sub>)  $\delta$  207.9, 139.5, 138.3, 138.0, 128.4, 128.1, 114.8, 45.1, 35.4, 34.8, 30.0, 29.2. HRMS (CI) calc. for C<sub>14</sub>H<sub>18</sub>NaO [M+Na]<sup>+</sup>: 225.1251. Found: 225.1249.

**4-(4-(But-3-enyl)phenyl)butan-2-one (14).** The title compound was prepared from 3-(4-(3-oxobutyl)phenyl)propanal (**7**) (204 mg, 1 mmol) according to the general procedure **B** (reaction time 4 h). The desired alkene **14** (152 mg, 75%) was obtained as a colorless oil after flash chromatography (5% EtOAc/hexanes).

**4-(4-(But-3-enyl)phenyl)butan-2-one (14).** The title compound was prepared from 3-(4-(3-oxobutyl)phenyl)propanal (**7**) (121 mg, 0.59 mmol) according to the general procedure **C** (reaction time 16 h). The desired alkene **14** (92 mg, 77%) was obtained as a colorless oil after flash chromatography (5% EtOAc/hexanes).

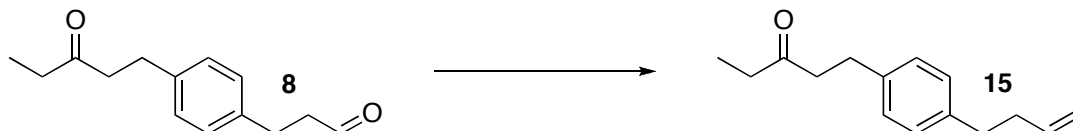

**1-(4-(But-3-enyl)phenyl)pentan-3-one (15).** The title compound was prepared from 3-(4-(3-oxopentyl)phenyl)propanal (**8**) (105 mg, 0.48 mmol) according to the general procedure **A** (reaction time 2 h). The desired alkene **15** (83 mg, 80 %) was obtained as a colorless oil after flash chromatography (2.5% EtOAc/hexanes).  $R_f$  0.30 (10% EtOAc/hexanes). IR (neat) 2938, 1710, 1518, 1412, 1372, 1113, 823  $\text{cm}^{-1}$ .  $^1\text{H}$  NMR (300 MHz,  $\text{CDCl}_3$ )  $\delta$  7.10 (s, 4H), 5.86 (ddt,  $J = 18, 10, 7$  Hz, 1H), 5.04 (d,  $J = 18$  Hz, 1H), 4.98 (d,  $J = 10$  Hz, 1H), 2.90-2.85 (m, 2H), 2.74-2.65 (m, 4H), 2.44-2.32 (m, 4H), 1.04 (t,  $J = 7$  Hz, 3H).  $^{13}\text{C}$  NMR (75 MHz,  $\text{CDCl}_3$ )  $\delta$  210.7, 139.5, 138.5, 138.0, 128.4, 128.1, 114.8, 43.9, 36.0, 35.4, 34.8, 29.4, 7.70. HRMS (MAB) calc. for  $\text{C}_{15}\text{H}_{20}\text{O}$   $[\text{M}]^+$ : 216.1514. Found 216.1513.

**1-(4-(But-3-enyl)phenyl)pentan-3-one (15).** The title compound was prepared from 3-(4-(3-oxopentyl)phenyl)propanal (**8**) (109 mg, 0.50 mmol) according to the general procedure **B** (reaction time 16 h). The desired alkene **15** (86 mg, 80%) was obtained as a colorless oil after flash chromatography (2.5% EtOAc/hexanes).

**1-(4-(But-3-enyl)phenyl)pentan-3-one (15).** The title compound was prepared from 3-(4-(3-oxopentyl)phenyl)propanal (**8**) (97 mg, 0.45 mmol) according to the general procedure **C** (reaction time 5 h). The desired alkene **15** (60 mg, 62%) was obtained as a colorless oil after flash chromatography (2.5% EtOAc/hexanes).

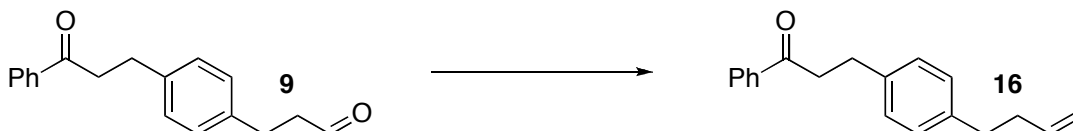

**3-(4-But-3-enylphenyl)-1-phenylpropan-1-one (16).** The title compound was prepared from 3-(4-(3-oxo-3-phenylpropyl)phenyl)propanal (**9**) (134 mg, 0.50 mmol) according to the general procedure **A** (reaction time 2 h). The desired alkene **16** (110 mg, 83 %) was obtained as a colorless oil after flash chromatography (1% EtOAc/hexanes).  $R_f$  0.35 (10% EtOAc/hexanes). IR (neat) 2924, 2854, 1684, 1448, 1202, 975, 911, 724, 690  $\text{cm}^{-1}$ .  $^1\text{H}$  NMR (300 MHz,  $\text{CDCl}_3$ )  $\delta$  7.96 (d,  $J = 7$  Hz, 2H), 7.58-7.53 (m, 1H), 7.47-7.42 (m, 2H), 7.18 (d,  $J = 8$  Hz, 2H), 7.13 (d,  $J = 8$  Hz, 2H), 5.86 (ddt,  $J = 17, 10, 7$  Hz, 1H), 5.04 (d,  $J = 17$  Hz, 1H), 4.98 (d,  $J = 10$  Hz, 1H), 3.32-3.27 (m, 2H), 3.06-3.01 (m, 2H), 2.71-2.65 (m, 2H), 2.39-2.32 (m, 2H).  $^{13}\text{C}$  NMR (100 MHz,  $\text{CDCl}_3$ )  $\delta$  199.3, 139.6, 138.5, 138.0, 136.7, 133.0, 128.5, 128.5, 128.2, 127.9, 114.8, 40.4, 35.5, 34.8, 29.6. HRMS (CI) calc. for  $\text{C}_{19}\text{H}_{21}\text{O}$   $[\text{M}+\text{H}]^+$ : 265.1586. Found: 265.1585.

**3-(4-But-3-enylphenyl)-1-phenylpropan-1-one (16).** The title compound was prepared from 3-(4-(3-oxo-3-phenylpropyl)phenyl)propanal (**9**) (134 mg, 0.50 mmol) according to the general procedure **B** (reaction time 7 h). The desired alkene **16** (103 mg, 78 %) was obtained as a colorless oil after flash chromatography (1% EtOAc/hexanes).



**3-(4-But-3-enylphenyl)-1-phenylpropan-1-one (16).** The title compound was prepared from 3-(4-(3-oxo-3-phenylpropyl)phenyl)propanal (**9**) (98 mg, 0.37 mmol) according to the general procedure **C** (reaction time 3 h). The desired alkene **16** (58 mg, 59 %) was obtained as a colorless oil after flash chromatography (1% EtOAc/hexanes).

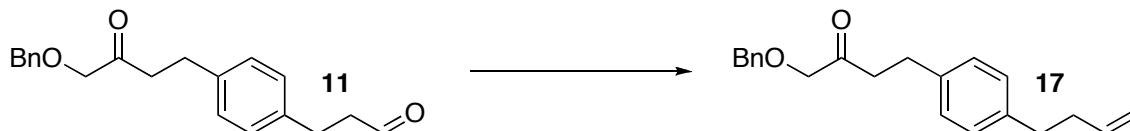

**1-(Benzyloxy)-4-(4-(but-3-enyl)phenyl)butan-2-one (17).** The title compound was prepared from 3-(4-(4-(benzyloxy)-3-oxobutyl)phenyl)propanal (**11**) (110 mg, 0.36 mmol) according to the general procedure **A** (reaction time 2 h). The desired alkene **17** (81 mg, 74%) was obtained as a colorless oil after flash chromatography (2% EtOAc/hexanes).  $R_f$  0.35 (10% EtOAc/hexanes). IR (neat) 2925, 2856, 1723, 1437, 1102, 913  $\text{cm}^{-1}$ .  $^1\text{H}$  NMR (400 MHz,  $\text{CDCl}_3$ )  $\delta$  7.37-7.30 (m, 5H), 7.09 (s, 4H), 5.85 (ddt,  $J$  = 17, 10, 7 Hz, 1H), 5.03 (d,  $J$  = 17 Hz, 1H), 4.97 (d,  $J$  = 10 Hz, 1H), 4.55 (s, 2H), 4.02 (s, 2H), 2.90-2.86 (m, 2H), 2.80-2.76 (m, 2H), 2.69-2.65 (m, 2H), 2.37-2.32 (m, 2H).  $^{13}\text{C}$  NMR (75 MHz,  $\text{CDCl}_3$ )  $\delta$  208.0, 139.6, 138.1, 138.0, 137.0, 128.5, 128.4, 128.2, 127.9, 127.8, 114.8, 75.1, 73.3, 40.6, 35.4, 34.8, 28.8. HRMS (CI) calc. for  $\text{C}_{21}\text{H}_{24}\text{NaO}_2$   $[\text{M}+\text{Na}]^+$ : 331.1668. Found: 331.1679.

**1-(Benzyloxy)-4-(4-(but-3-enyl)phenyl)butan-2-one (17).** The title compound was prepared from 3-(4-(4-(benzyloxy)-3-oxobutyl)phenyl)propanal (**11**) (120 mg, 0.39 mmol) according to the general procedure **B** (reaction time 16 h). The desired alkene **17** (86 mg, 72%) was obtained as a colorless oil after flash chromatography (2% EtOAc/hexanes).

**1-(Benzyloxy)-4-(4-(but-3-enyl)phenyl)butan-2-one (17).** The title compound was prepared from 3-(4-(4-(benzyloxy)-3-oxobutyl)phenyl)propanal (**11**) (20 mg, 0.060 mmol) according to the general procedure **C** (reaction time 2 h). The desired alkene **17** (11 mg, 56%) was obtained as a colorless oil after flash chromatography (5% EtOAc/hexanes).

**1-(3-((Benzyloxy)methyl)but-3-enyl)-4-(but-3-enyl)benzene (21).** Diene **21** was also obtained in 31% yield.  $R_f$  0.60 (10% EtOAc/Hexane). IR: 2926, 2854, 1640, 1514, 1453, 1095, 907, 735  $\text{cm}^{-1}$ .  $^1\text{H}$  NMR (400 MHz,  $\text{CDCl}_3$ )  $\delta$  7.37-7.28 (m, 5H), 7.12 (s, 4H), 5.87 (ddt,  $J$  = 17, 10, 7 Hz, 1H), 5.10-4.97 (m, 4H), 4.50 (s, 2H), 3.99 (s, 2H), 2.79-2.75 (m, 2H), 2.71-2.67 (m, 2H), 2.43-2.34 (m, 4H).  $^{13}\text{C}$  NMR (100 MHz,  $\text{CDCl}_3$ )  $\delta$  145.6, 139.3, 139.2, 138.3, 138.1 (2C), 128.3, 128.2, 127.6, 127.5, 114.7, 112.1, 73.2, 71.9, 35.5, 34.9 (2C), 33.7. HRMS (CI) calc. for  $\text{C}_{22}\text{H}_{27}\text{O}$   $[\text{M}+\text{H}]^+$ : 307.2056. Found: 307.2051.

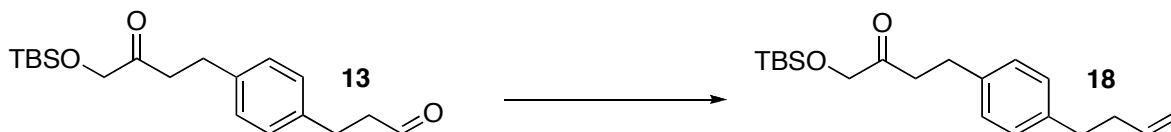

**4-(4-(But-3-enyl)phenyl)-1-(tert-butyldimethylsilyloxy)butan-2-one (18).** The title compound was prepared from 3-(4-(4-(tert-butyldimethylsilyl)-3-oxobutyl)phenyl)propanal (**13**) (103 mg, 0.21 mmol) according to the general procedure **A** (reaction time 2 h). The desired alkene **18** (80 mg, 78%) was obtained as a colorless oil after flash chromatography (2% EtOAc/hexanes).  $R_f$  0.40 (10% EtOAc/hexanes). IR (neat) 2929, 2856, 1718, 1252, 1154, 1101, 845, 777  $\text{cm}^{-1}$ .  $^1\text{H}$  NMR (300 MHz,  $\text{CDCl}_3$ )  $\delta$  7.11 (s, 4H), 5.86 (ddt,  $J$  = 17, 10, 7 Hz, 1H), 5.04 (d,  $J$  = 17 Hz, 1H), 4.98 (d,  $J$  = 10 Hz, 1H), 4.14 (s, 2H), 2.92-2.78 (m, 4H), 2.70-2.65 (m, 2H), 2.39-2.32 (m, 2H), 0.91 (s, 9H), 0.07 (s, 6H).

$^{13}\text{C}$  NMR (75 MHz,  $\text{CDCl}_3$ )  $\delta$  210.2, 139.5, 138.3, 138.1, 128.4, 128.2, 114.8, 69.4, 39.8, 35.5, 34.9, 28.8, 25.7, 18.2, -5.5. HRMS (CI) calc. for  $\text{C}_{19}\text{H}_{31}\text{O}_3\text{Si}$   $[\text{M}+\text{H}]^+$ : 357.1856. Found: 357.1854.

**1-(*tert*-Butyldimethylsilyl)-4-(4-(but-3-enyl)phenyl)propanal (18).** The title compound was prepared from 3-(4-(4-(*tert*-Butyldimethylsilyl)-3-oxobutyl)phenyl)propanal (**13**) (335 mg, 1.00 mmol) according to the general procedure **B** (reaction time 16 h). The desired alkene **18** (193 mg, 58%) was obtained as a colorless oil after flash chromatography (2% EtOAc/hexanes).

**1-(*tert*-Butyldimethylsilyl)-4-(4-(but-3-enyl)phenyl)propanal (18).** The title compound was prepared from 3-(4-(4-(*tert*-Butyldimethylsilyl)-3-oxobutyl)phenyl)propanal (**13**) (61 mg, 0.18 mmol) according to the general procedure **C** (reaction time 4 h). The desired alkene **18** (21 mg, 35%) was obtained as a colorless oil after flash chromatography (2% EtOAc/hexanes).

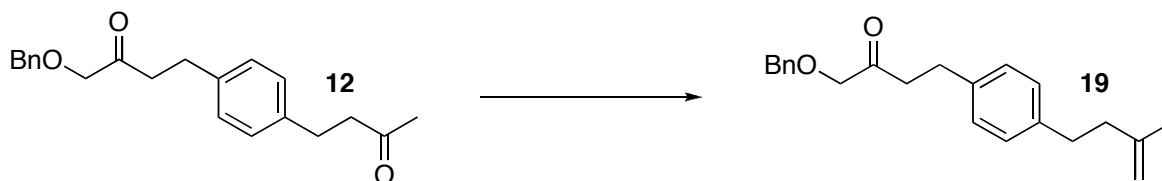

**4-(4-(3-((Benzyloxy)methyl)but-3-enyl)phenyl)butan-2-one (19).** The title compound was prepared from 1-(benzyloxy)-4-(4-(3-oxobutyl)phenyl)butan-3-one (**12**) (94 mg, 0.29 mmol) according to the general procedure **A** (reaction time 2 h). The desired alkene **19** (77 mg, 83%) was obtained as a colorless oil after flash chromatography (5% EtOAc/Hexanes).  $R_f$  0.10 (10% EtOAc/hexanes). IR (neat) 2923, 2856, 1715, 1453, 1364, 1095, 738, 698  $\text{cm}^{-1}$ .  $^1\text{H}$  NMR (400 MHz,  $\text{CDCl}_3$ )  $\delta$  7.35-7.28 (m, 5H), 7.11-7.10 (m, 4H), 5.08 (s, 1H), 4.97 (s, 1H), 4.49 (s, 2H), 3.98 (s, 2H), 2.88-2.84 (m, 2H), 2.76-2.72 (m, 2H), 2.40-2.36 (m, 2H), 2.13 (s, 3H).  $^{13}\text{C}$  NMR (100 MHz,  $\text{CDCl}_3$ )  $\delta$  208.1, 145.5, 139.7, 138.3, 138.3, 128.4, 128.3, 128.2, 127.6, 127.5, 112.2, 73.1, 71.9, 45.2, 34.8, 33.6, 30.0, 29.3. HRMS (CI) calc. for  $\text{C}_{22}\text{H}_{26}\text{NaO}_2$   $[\text{M}+\text{Na}]^+$ : 345.1827. Found: 345.1825.

**4-(4-(3-((Benzyloxy)methyl)but-3-enyl)phenyl)butan-2-one (19).** The title compound was prepared from 1-(benzyloxy)-4-(4-(3-oxobutyl)phenyl)butan-3-one (**12**) (188 mg, 0.58 mmol) according to the general procedure **B** (reaction time 8 h). The desired alkene **19** (127 mg, 68%) was obtained as a colorless oil after flash chromatography (5% EtOAc/hexanes).

**4-(4-(3-((Benzyloxy)methyl)but-3-enyl)phenyl)butan-2-one (19).** The title compound was prepared from 1-(benzyloxy)-4-(4-(3-oxobutyl)phenyl)butan-3-one (**12**) (32 mg, 0.10 mmol) according to the general procedure **C** (reaction time 5 h). The desired alkene **19** (18 mg, 56%) was obtained as a colorless oil after flash chromatography (5% EtOAc/hexanes).

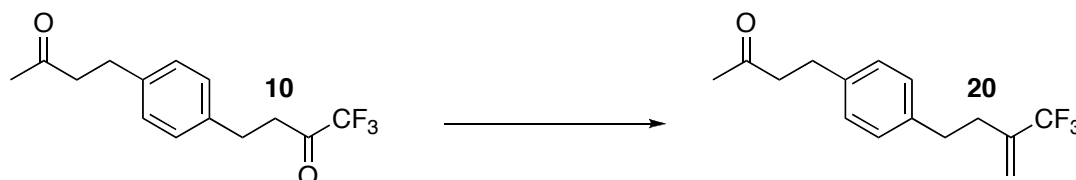

**4-(4-(3-(Trifluoromethyl)but-3-enyl)phenyl)butan-2-one (20).** The title compound was prepared from 1-(4-(4,4,4-trifluoro-3-oxobutyl)phenyl)butan-3-one (**10**) (67 mg, 0.25 mmol) according to the general procedure **A** (reaction time 2 h). The desired alkene **20** (52 mg, 79%) was obtained as a colorless oil after flash chromatography (3% EtOAc/hexanes).  $R_f$  0.10 (10% EtOAc/hexanes). IR (neat) 2932, 1717, 1362, 1165, 1124  $\text{cm}^{-1}$ .  $^1\text{H}$  NMR (400 MHz,  $\text{CDCl}_3$ )  $\delta$  7.11 (s, 4H), 5.68 (s, 1H), 5.29 (s, 1H), 2.89-2.85 (m, 2H), 2.82-2.73 (m, 4H), 2.49 (t,  $J$  = 8 Hz, 2H), 2.14 (s, 3H).  $^{13}\text{C}$  NMR (100 MHz,

CDCl<sub>3</sub>)  $\delta$  208.0, 138.8, 138.3, 137.6 (q,  $J$  = 29 Hz), 128.4, 128.3, 123.7 (q,  $J$  = 272 Hz), 118.1 (q,  $J$  = 6 Hz), 45.1, 33.2, 31.1, 30.0, 29.2. <sup>19</sup>F NMR (282 MHz, CDCl<sub>3</sub>)  $\delta$  -68.8. HRMS (CI) calc. for C<sub>15</sub>H<sub>18</sub>F<sub>3</sub>O [M+H]<sup>+</sup>: 271.1304. Found: 271.1306.

**4-(4-(3-(Trifluoromethyl)but-3-enyl)phenyl)butan-2-one (20).** The title compound was prepared from 1-(4-(4,4,4-trifluoro-3-oxobutyl)phenyl)butan-3-one (**10**) (44 mg, 0.16 mmol) according to the general procedure **B** (reaction time 3 h). The desired alkene **20** (36 mg, 84%) was obtained as a colorless oil after flash chromatography (3% EtOAc/hexanes).

**4-(4-(3-(Trifluoromethyl)but-3-enyl)phenyl)butan-2-one (20).** The title compound was prepared from 1-(4-(4,4,4-trifluoro-3-oxobutyl)phenyl)butan-3-one (**10**) (44 mg, 0.16 mmol) according to the general procedure **C** (reaction time 1 h). The desired alkene **20** (40 mg, 93%) was obtained as a colorless oil after flash chromatography (3% EtOAc/hexanes).

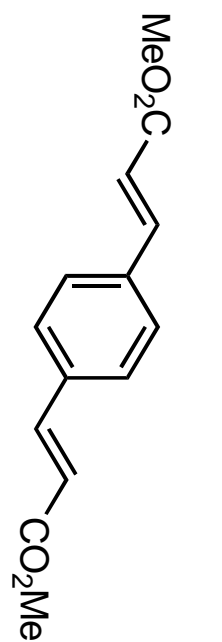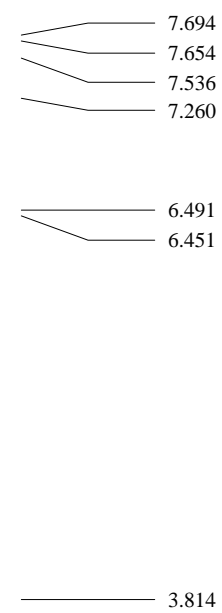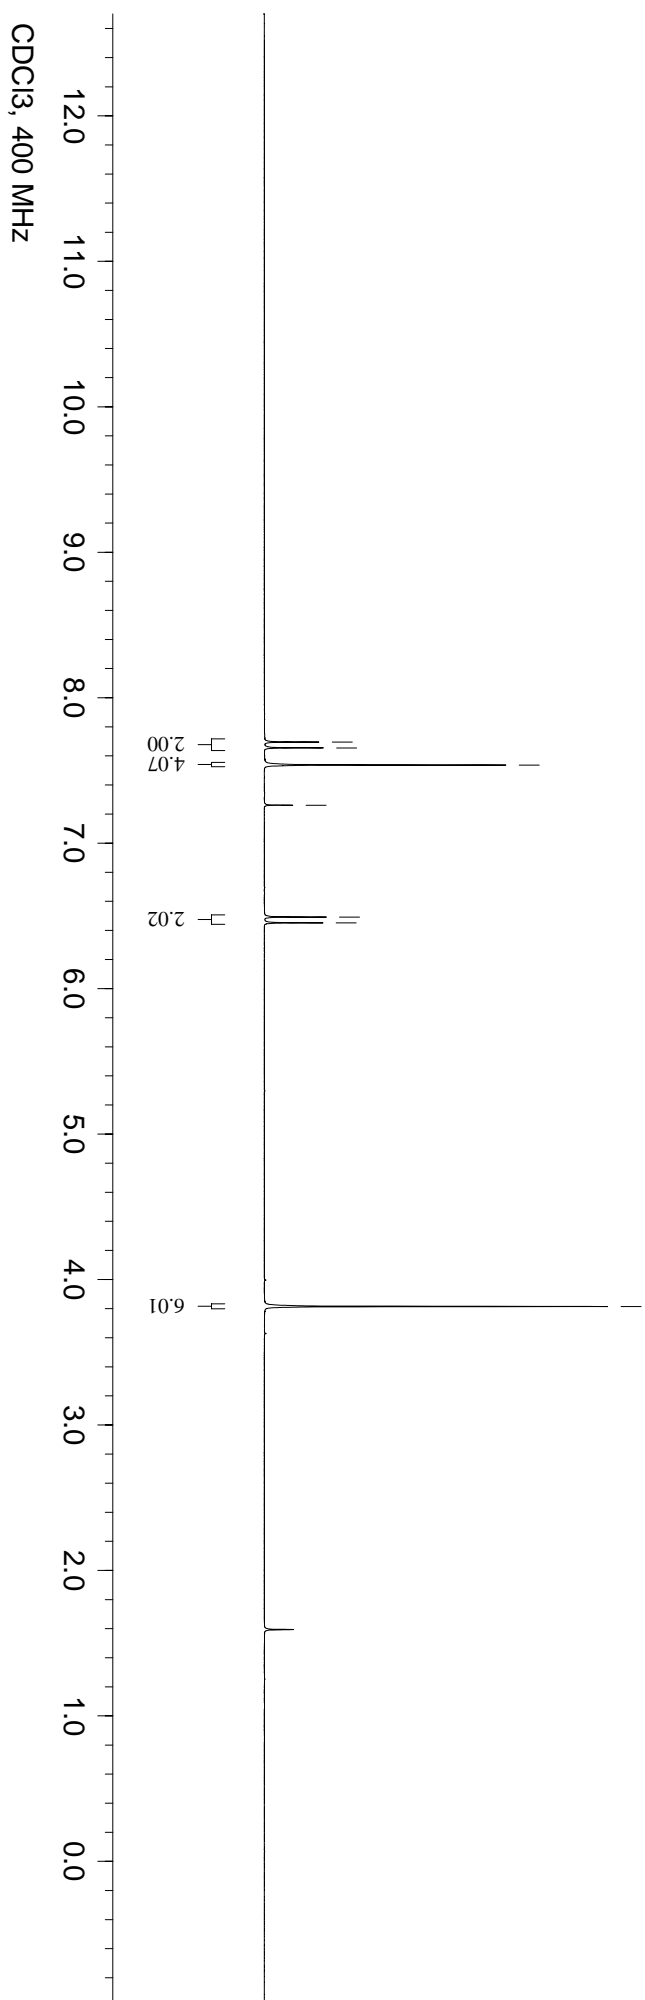

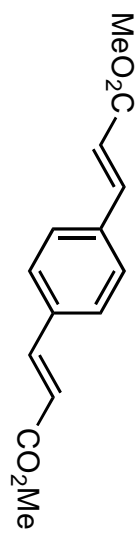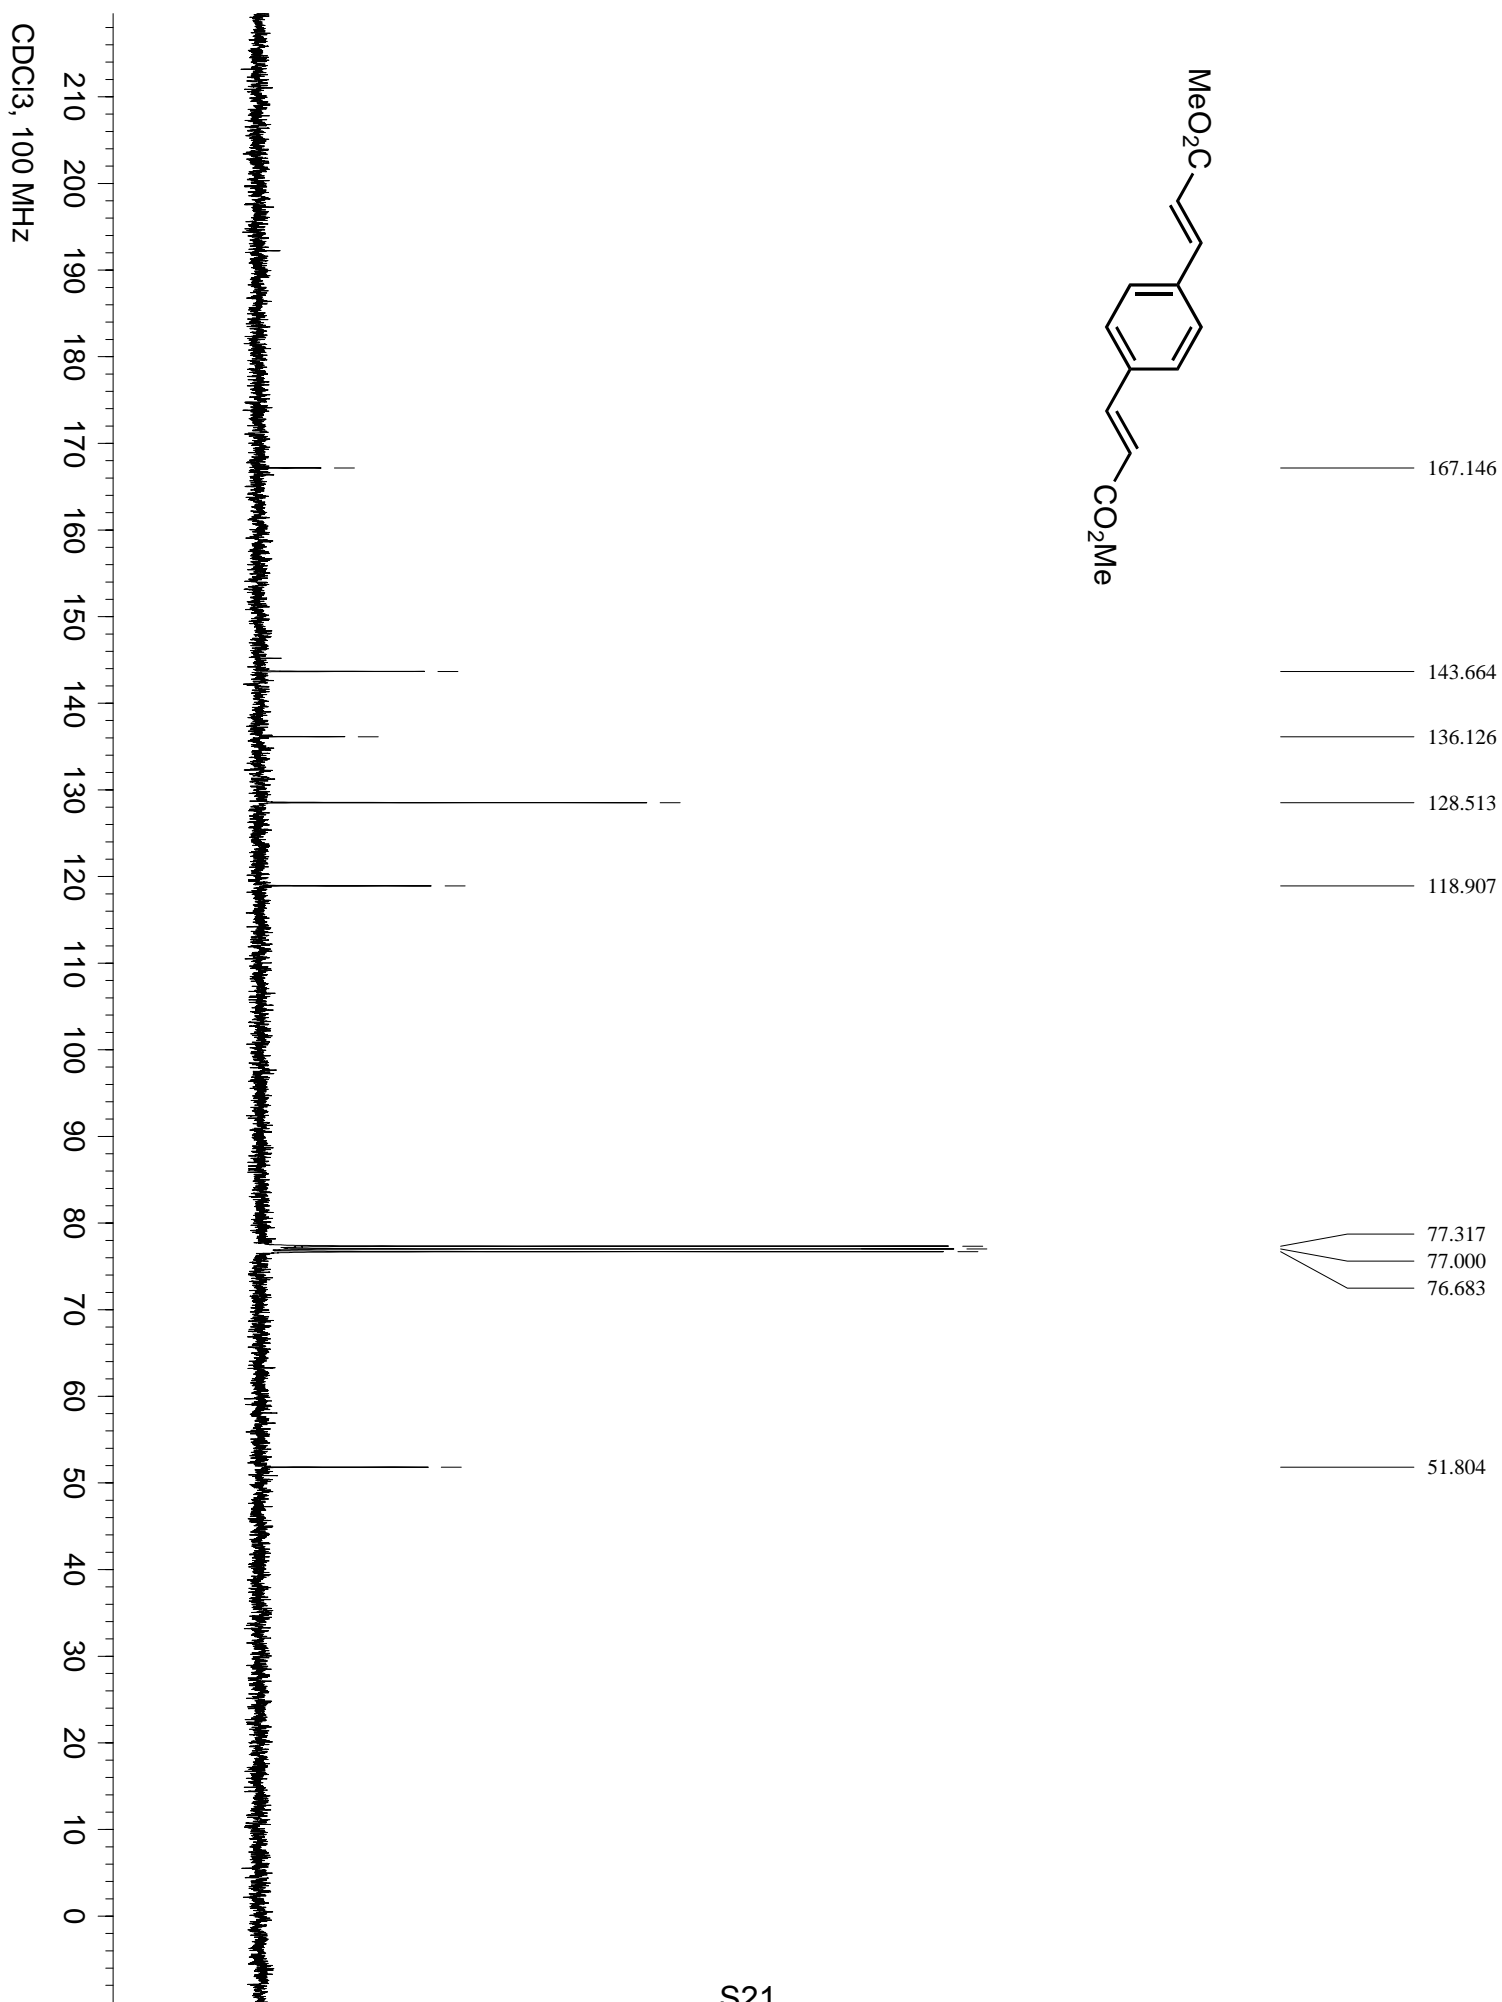

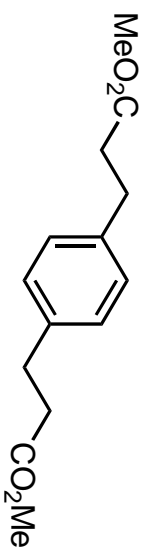

7.260  
7.120

3.696

2.562  
2.563  
2.593  
2.632  
2.686  
2.916  
2.935

3.95

5.96

4.03

4.02

S22

CDCl<sub>3</sub>, 400 MHz

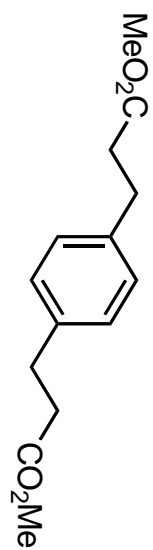

173.322

138.377

128.363

77.317  
77.000  
76.682

51.593

35.647

30.454

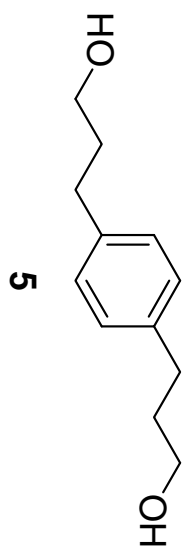

7.260  
7.122

3.686  
3.670  
3.654

2.695  
2.676  
2.656

1.914  
1.898  
1.882  
1.876  
1.860  
1.844  
1.516  
1.508  
1.498

5

12.0  
11.0  
10.0  
9.0  
8.0  
7.0  
6.0  
5.0  
4.0  
3.0  
2.0  
1.0  
0.0

4.03

3.98

4.02

4.00

1.83



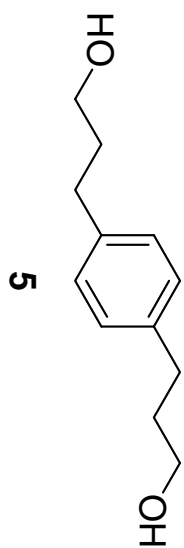

139.239

128.409

77.317  
77.000  
76.682

62.267

34.222  
31.592

S25

210 200 190 180 170 160 150 140 130 120 110 100 90 80 70 60 50 40 30 20 10 0

CDCI<sub>3</sub>, 100 MHz

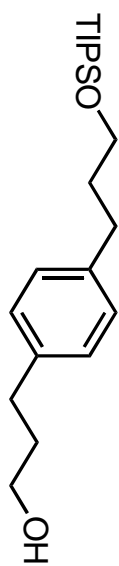

7.260  
7.143

3.756  
3.740  
3.725  
3.692  
3.676  
3.660  
2.722  
2.711  
2.703  
2.692  
2.683  
2.673

1.968  
1.932  
1.916  
1.912  
1.909  
1.900  
1.893  
1.884  
1.877  
1.870  
1.861  
1.858  
1.854  
1.839  
1.119  
1.109  
1.102  
1.091

S26

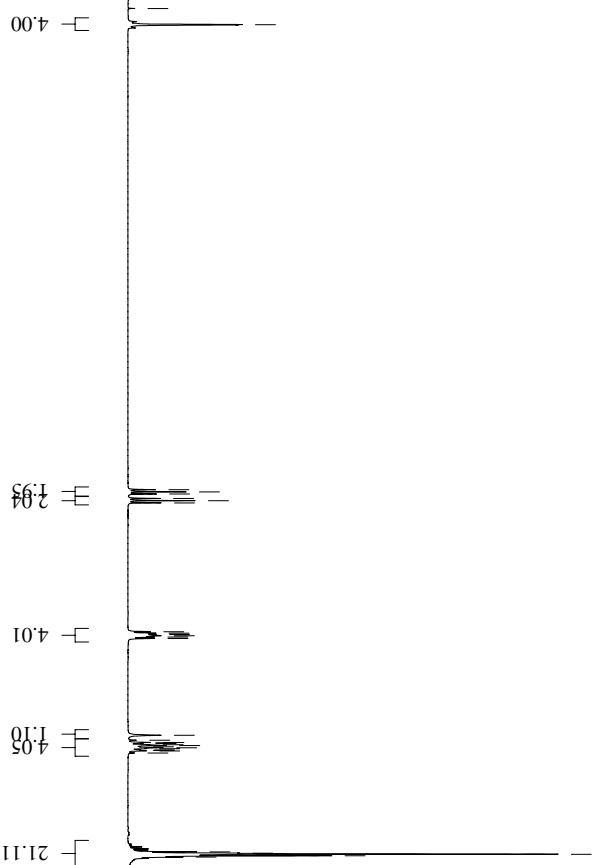

CDCl<sub>3</sub>, 400 MHz

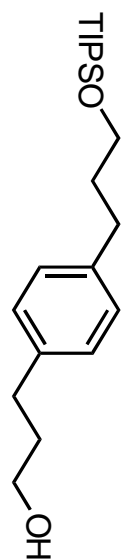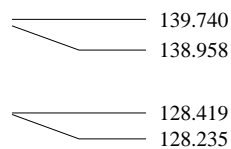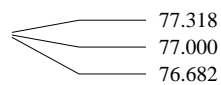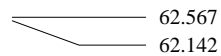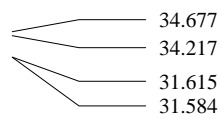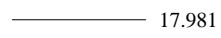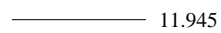

S27

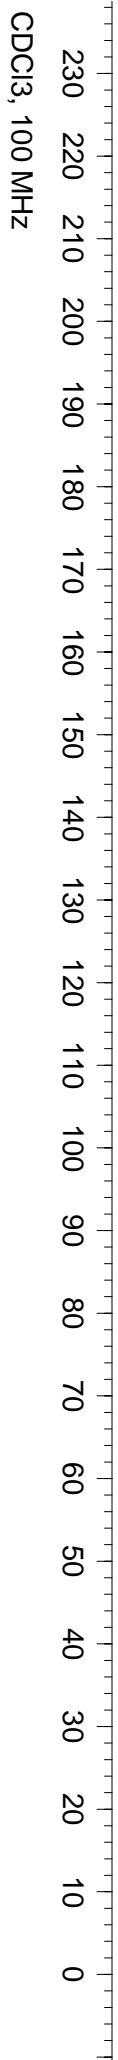

9.833  
9.828  
9.823

7.260  
7.176  
7.149  
7.136  
7.109

3.756  
3.736  
3.715  
2.973  
2.948  
2.923  
2.799  
2.775  
2.754  
2.749  
2.745  
2.730  
2.705  
2.678  
1.911  
1.890  
1.869  
1.863  
1.859  
1.849  
1.838  
1.817  
1.130  
1.100  
1.088  
1.073

6

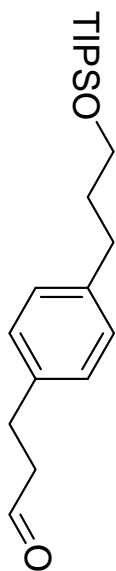

0.94

4.04

1.99

1.99

4.04

2.09

20.92

S28

CDCl<sub>3</sub>, 100 MHz

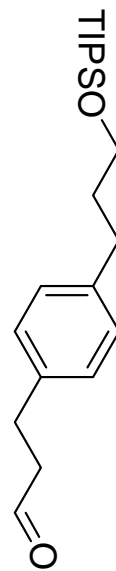

6

201.589

140.265

137.439

128.624

128.090

77.424

77.000

76.576

62.462

45.301

34.638

31.590

27.645

17.972

11.927

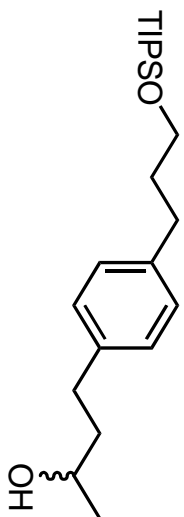

7.260  
7.132

3.856  
3.841  
3.825  
3.810  
3.741  
3.725  
3.709  
2.774  
2.707  
2.688  
2.668  
2.613  
1.893  
1.877  
1.838  
1.823  
1.804  
1.789  
1.766  
1.736  
1.584  
1.244  
1.229  
1.103  
1.085  
1.074  
1.065

4.04

0.99

4.04

4.02  
0.94

2.98  
20.90

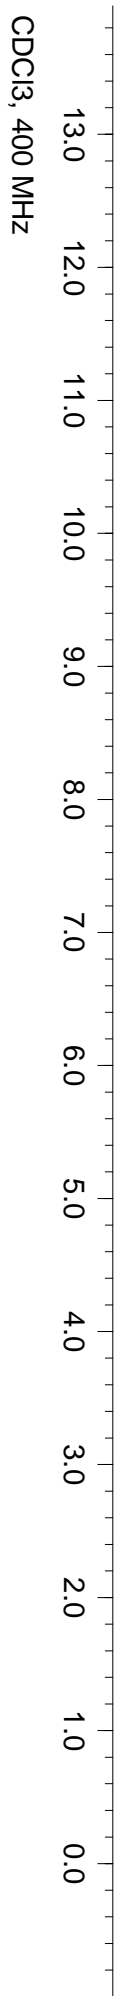

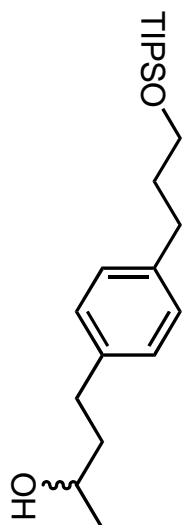

139.753  
139.181

128.459  
128.225

77.318  
77.000  
76.682

67.471  
62.581

40.885  
34.702  
31.674  
31.635  
23.561  
18.005  
11.968

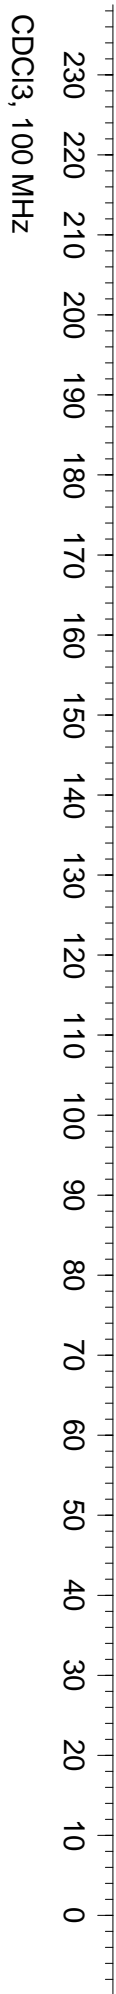

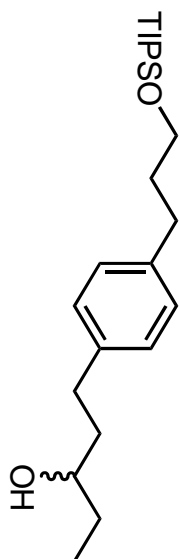

7.260  
7.128

3.733  
3.717  
3.701  
3.594  
3.583  
3.574  
3.570  
3.564  
3.554  
3.544  
3.533  
2.809  
2.736  
2.699  
2.660  
2.609  
1.885  
1.870  
1.830  
1.706  
1.586  
1.494  
1.441  
1.093  
1.075  
1.064  
0.971  
0.952

4.01

2.01  
1.00

1.06  
3.05

4.03  
2.99

21.02  
3.01

S32

CDCl<sub>3</sub>, 400 MHz



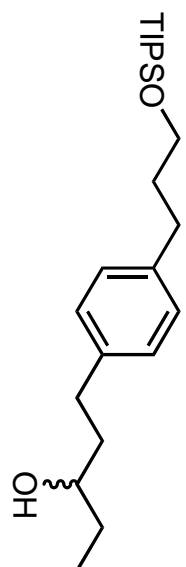

139.754  
139.359  
128.475  
128.263

77.318  
77.000  
76.682  
72.668  
62.606

38.645  
34.717  
31.654  
31.627  
30.260

18.021  
11.982  
9.836

S33

CDCI<sub>3</sub>, 100 MHz

230 220 210 200 190 180 170 160 150 140 130 120 110 100 90 80 70 60 50 40 30 20 10 0

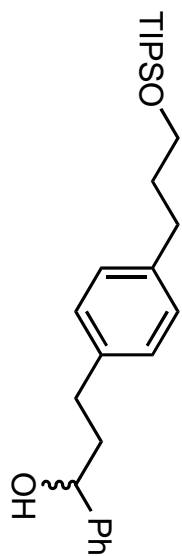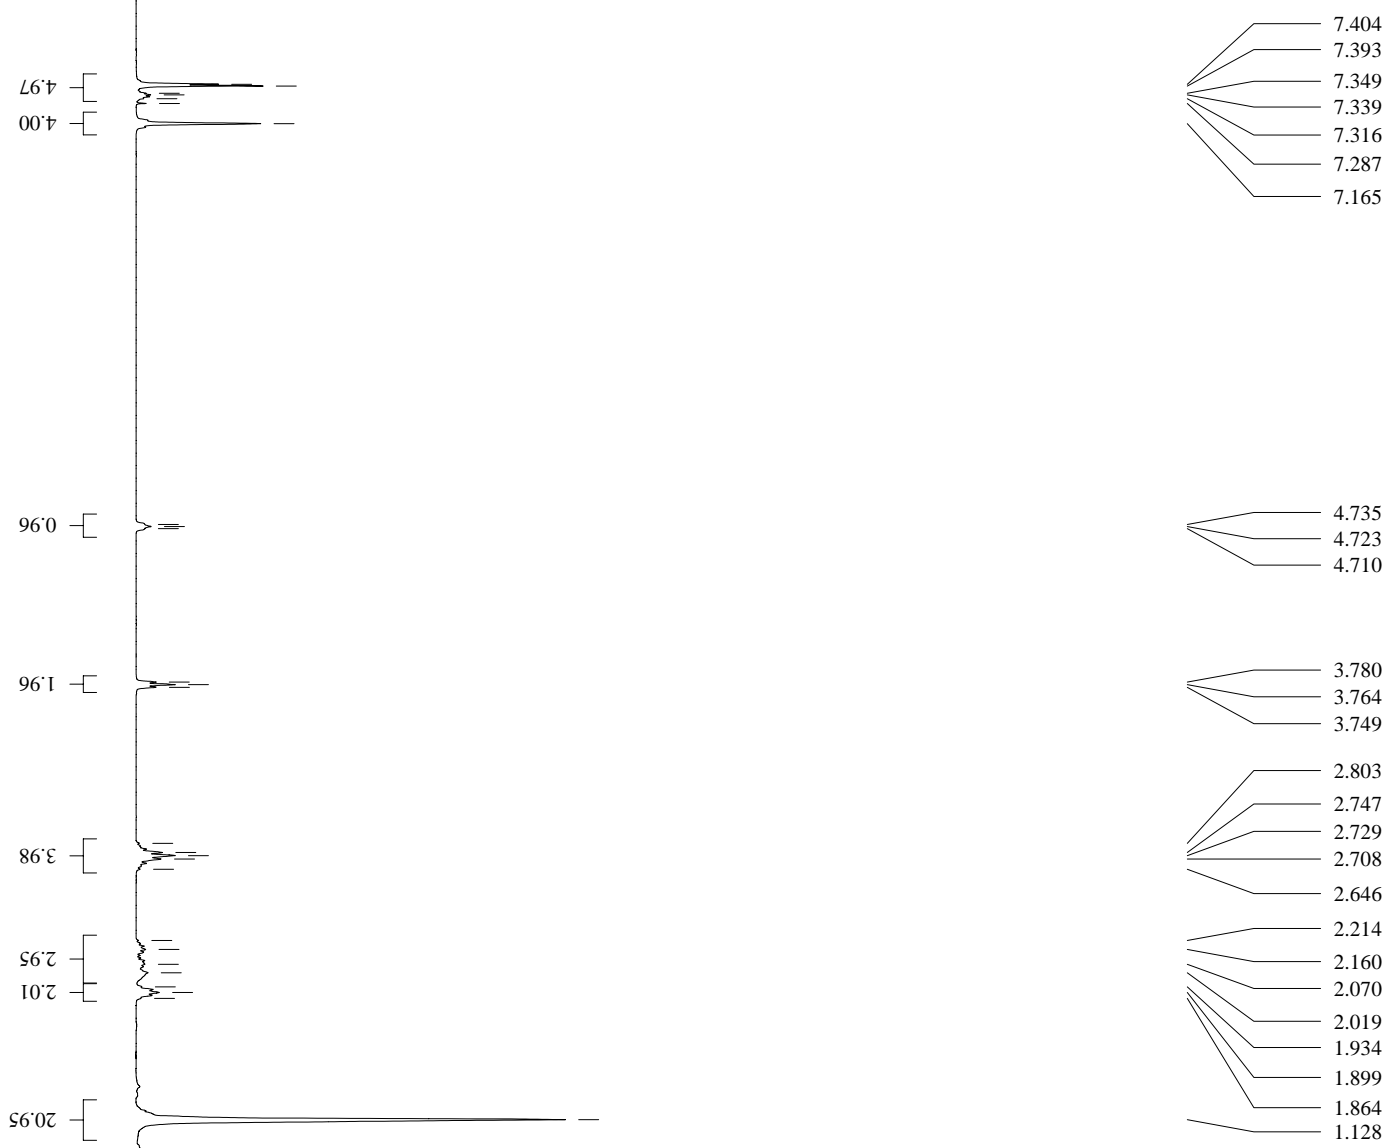

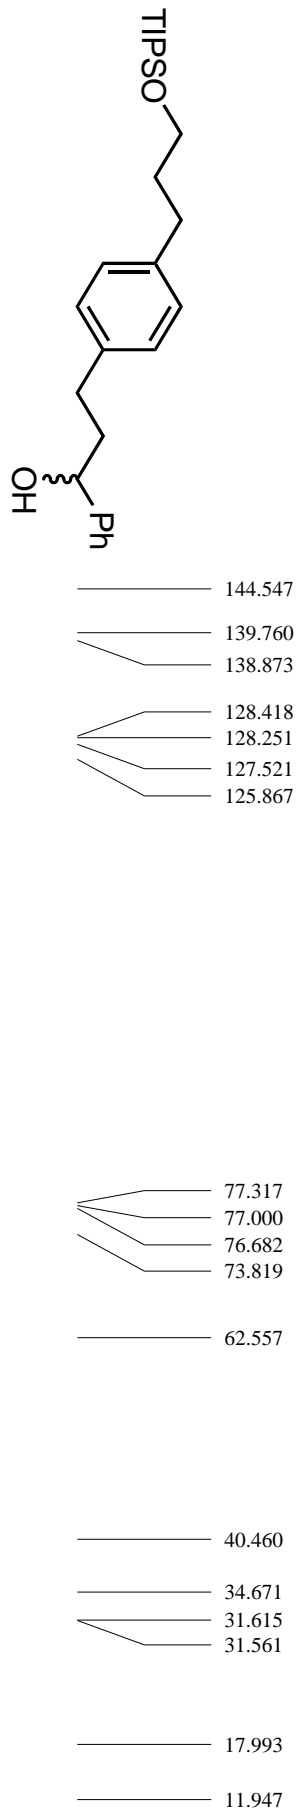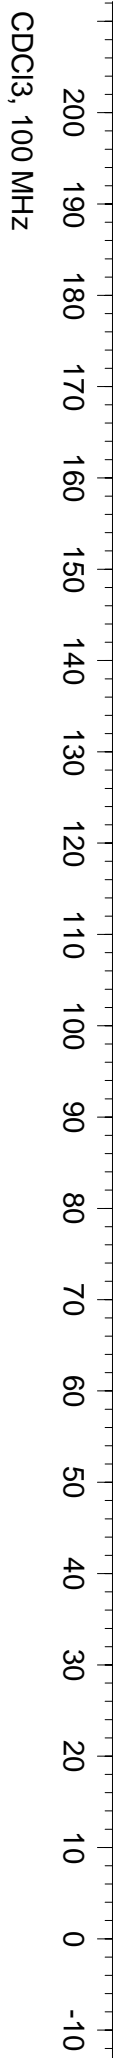

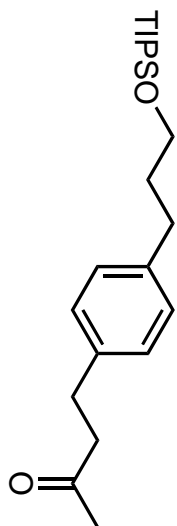

7.260  
7.149  
7.121  
7.111  
7.083

3.739  
3.718  
3.697  
2.902  
2.897  
2.874  
2.851  
2.846  
2.779  
2.773  
2.750  
2.727  
2.722  
2.708  
2.683  
2.677  
2.656  
2.143  
1.894  
1.873  
1.867  
1.863  
1.852  
1.846  
1.842  
1.832  
1.821  
1.800  
1.097  
1.083  
1.071

S36

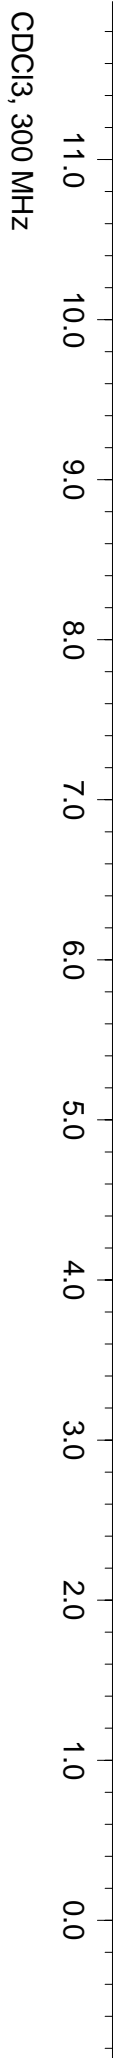

4.05

2.03

4.00  
2.01

3.00

2.04

21.03

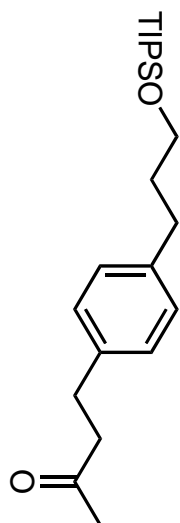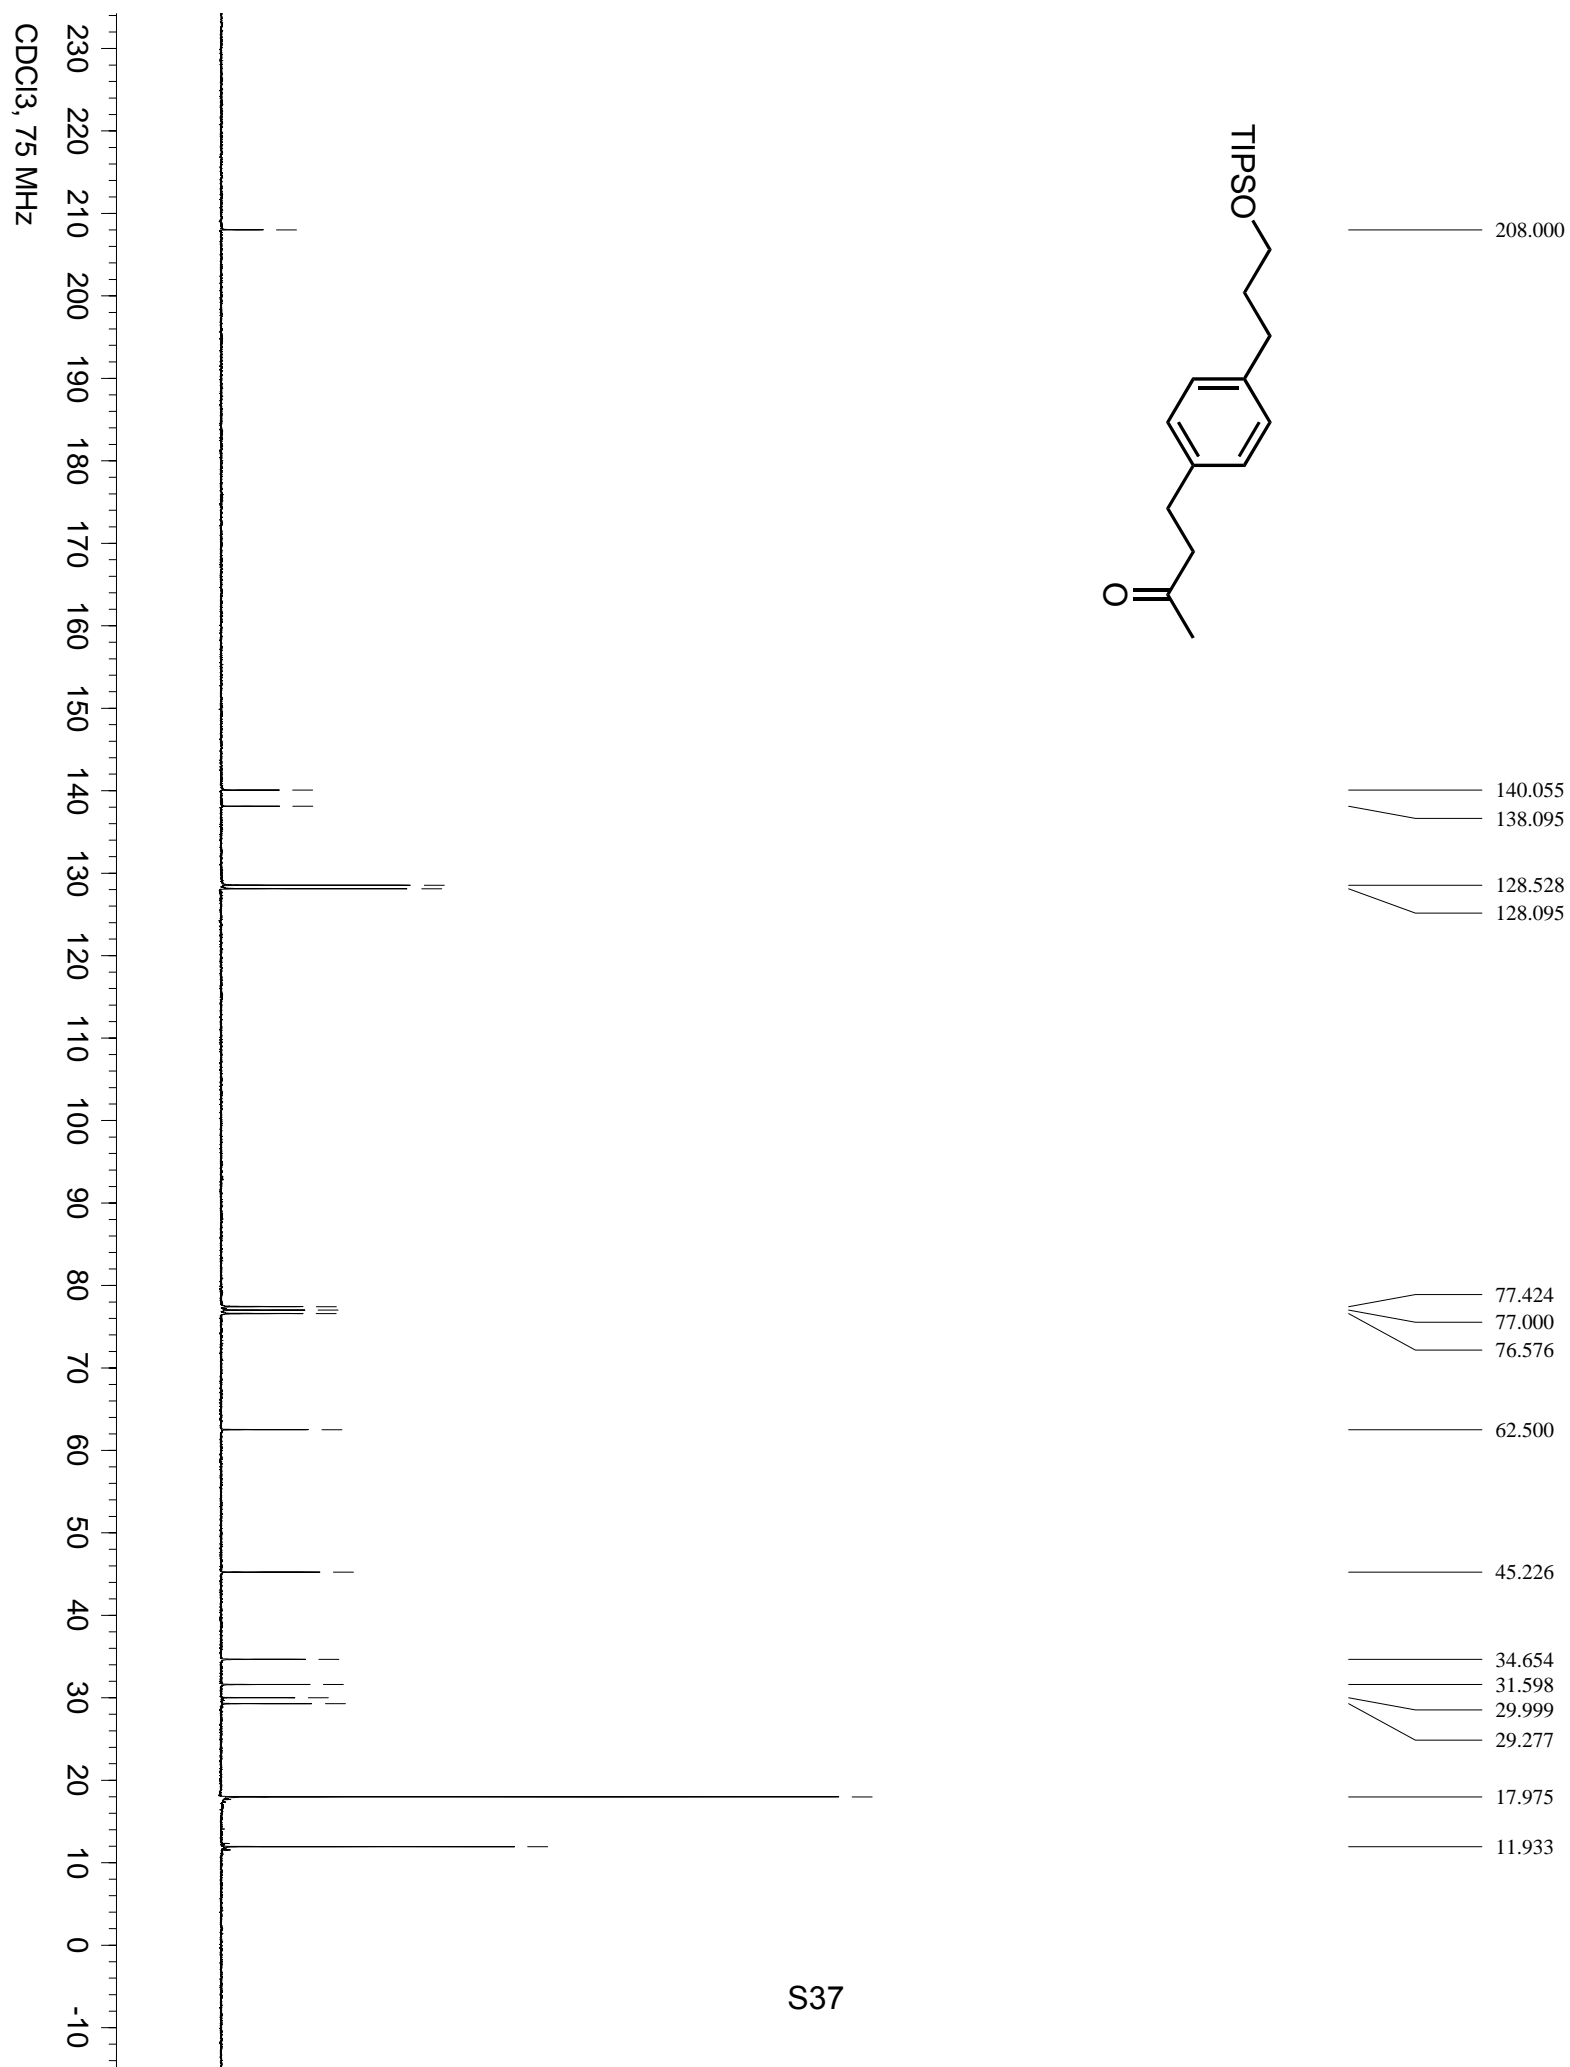

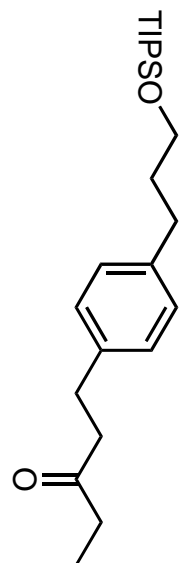

7.260  
7.147  
7.118  
7.114  
7.085

3.741  
3.720  
3.699  
2.907  
2.882  
2.857  
2.747  
2.721  
2.712  
2.687  
2.659  
2.449  
2.425  
2.400  
2.376  
1.896  
1.874  
1.852  
1.847  
1.825  
1.802  
1.086  
1.075  
1.056  
1.031

3.98

1.99

1.97

4.01

2.04

2.03

24.02

S38

CDCl<sub>3</sub>, 300 MHz

11.0  
10.0  
9.0  
8.0  
7.0  
6.0  
5.0  
4.0  
3.0  
2.0  
1.0  
0.0

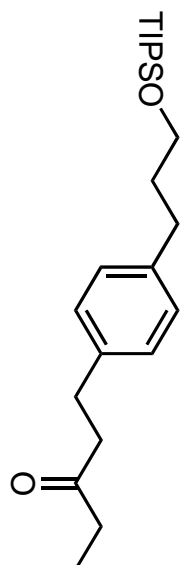

210.612

140.007  
138.295

128.510  
128.111

77.424  
77.000  
76.576

62.506

43.940

36.035  
34.660  
31.607  
29.402

17.977

11.947

7.691

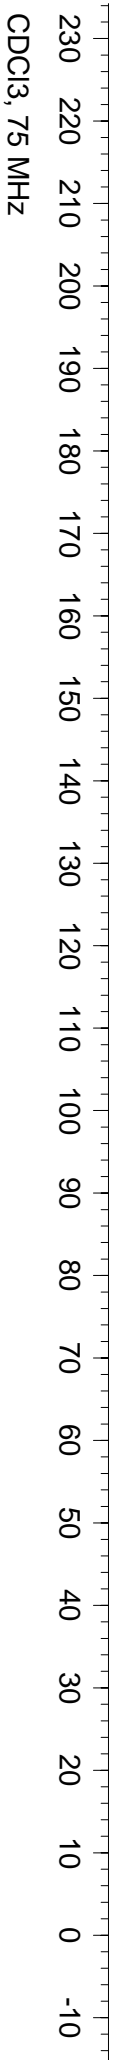

CDCl<sub>3</sub>, 75 MHz

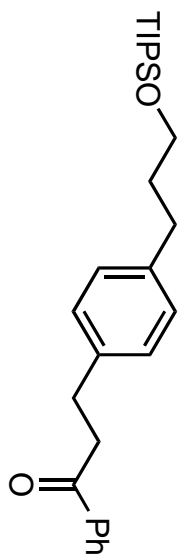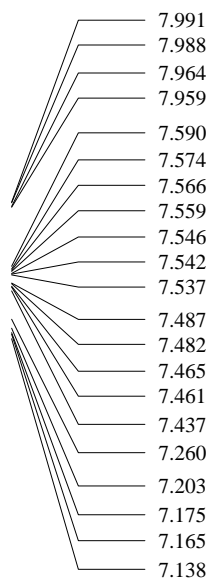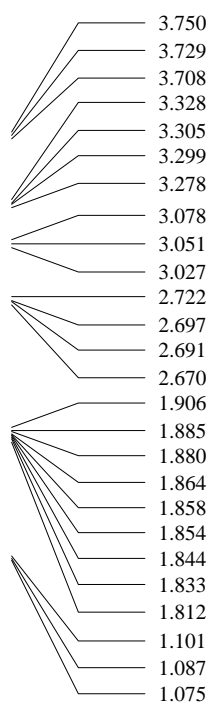

4.01  
2.07  
1.09  
1.99

2.03  
2.00  
2.00  
2.01  
1.97

21.04



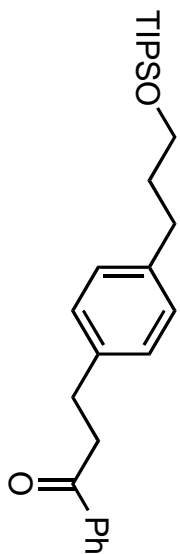

199.319

140.143  
138.440  
136.804  
132.988  
128.597  
128.542  
128.272  
127.999

77.423  
77.000  
76.577

62.568

40.560  
34.718  
31.660  
29.699

18.018

11.971

S41

CDCI3, 100 MHz

230 220 210 200 190 180 170 160 150 140 130 120 110 100 90 80 70 60 50 40 30 20 10 0 -10

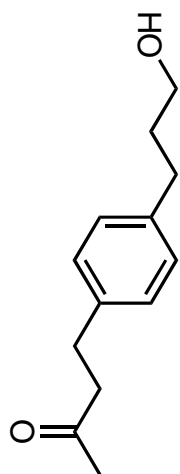

7.260  
7.102

3.675  
3.659  
3.643  
2.879  
2.876  
2.859  
2.840  
2.761  
2.741  
2.724  
2.722  
2.685  
2.666  
2.646  
2.135  
1.902  
1.886  
1.883  
1.880  
1.870  
1.867  
1.864  
1.854  
1.848  
1.831  
1.809

10.0  
9.0  
8.0  
7.0  
6.0  
5.0  
4.0  
3.0  
2.0  
1.0  
0.0

4.00

2.01

2.01  
1.99  
2.01

2.98  
2.99

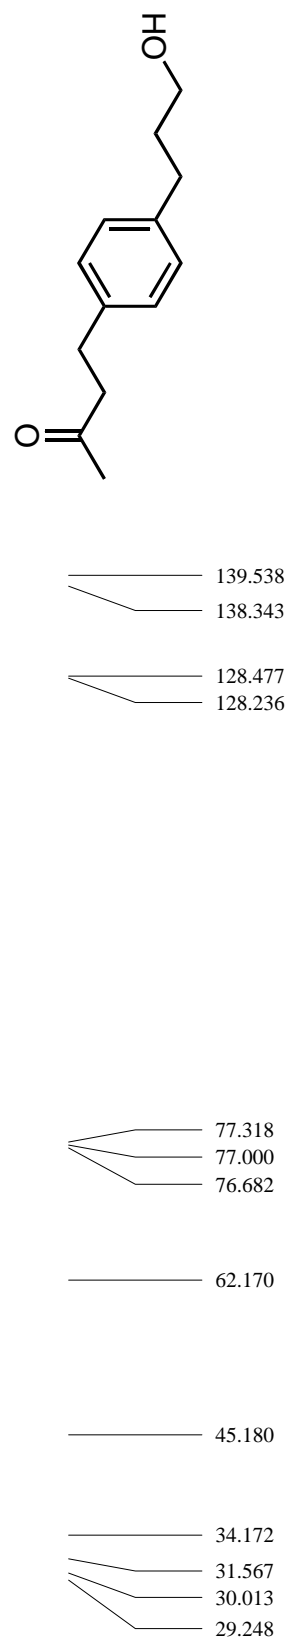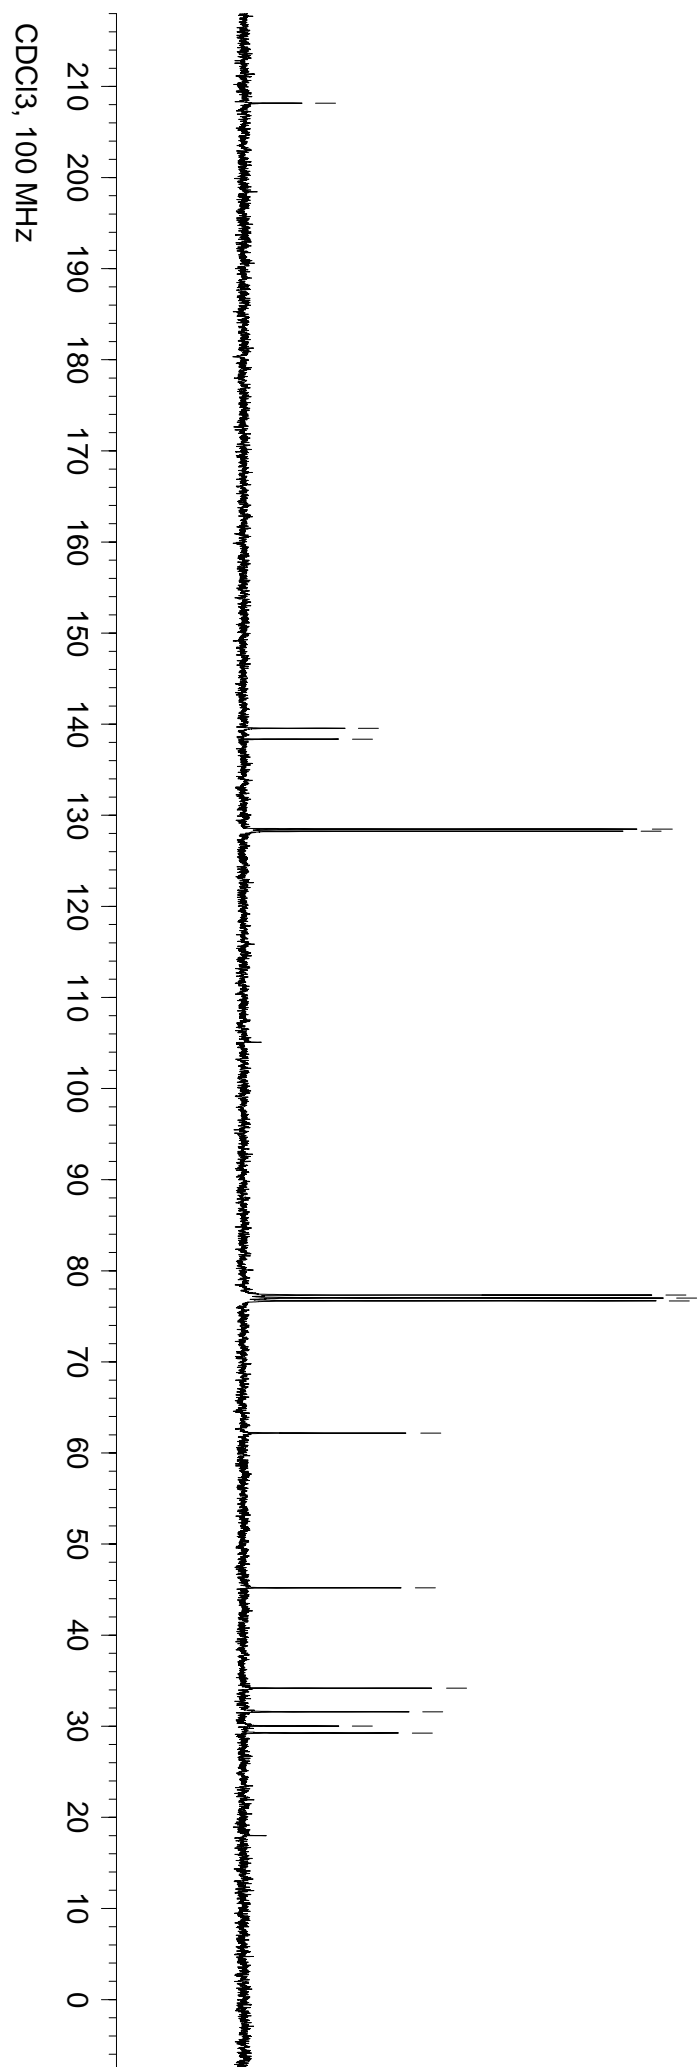

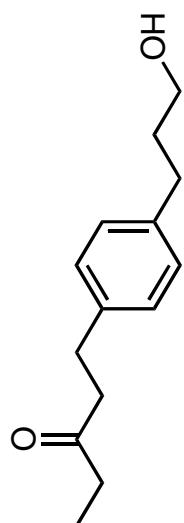

7.260  
7.101  
7.081  
7.074  
7.053

3.636  
3.620  
3.604  
2.893  
2.856  
2.838  
2.818  
2.708  
2.688  
2.670  
2.659  
2.640  
2.620  
2.407  
2.389  
2.370  
2.352  
1.877  
1.861  
1.841  
1.822  
1.806  
1.034  
1.016  
0.998

4.00

2.03

2.98

3.99

1.99

2.00

2.96

12.0  
11.0  
10.0  
9.0  
8.0  
7.0  
6.0  
5.0  
4.0  
3.0  
2.0  
1.0  
0.0

CDCI<sub>3</sub>, 400 MHz

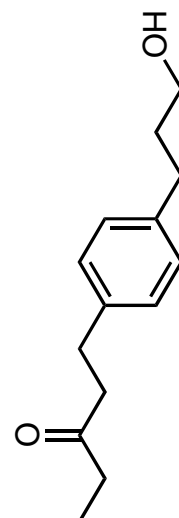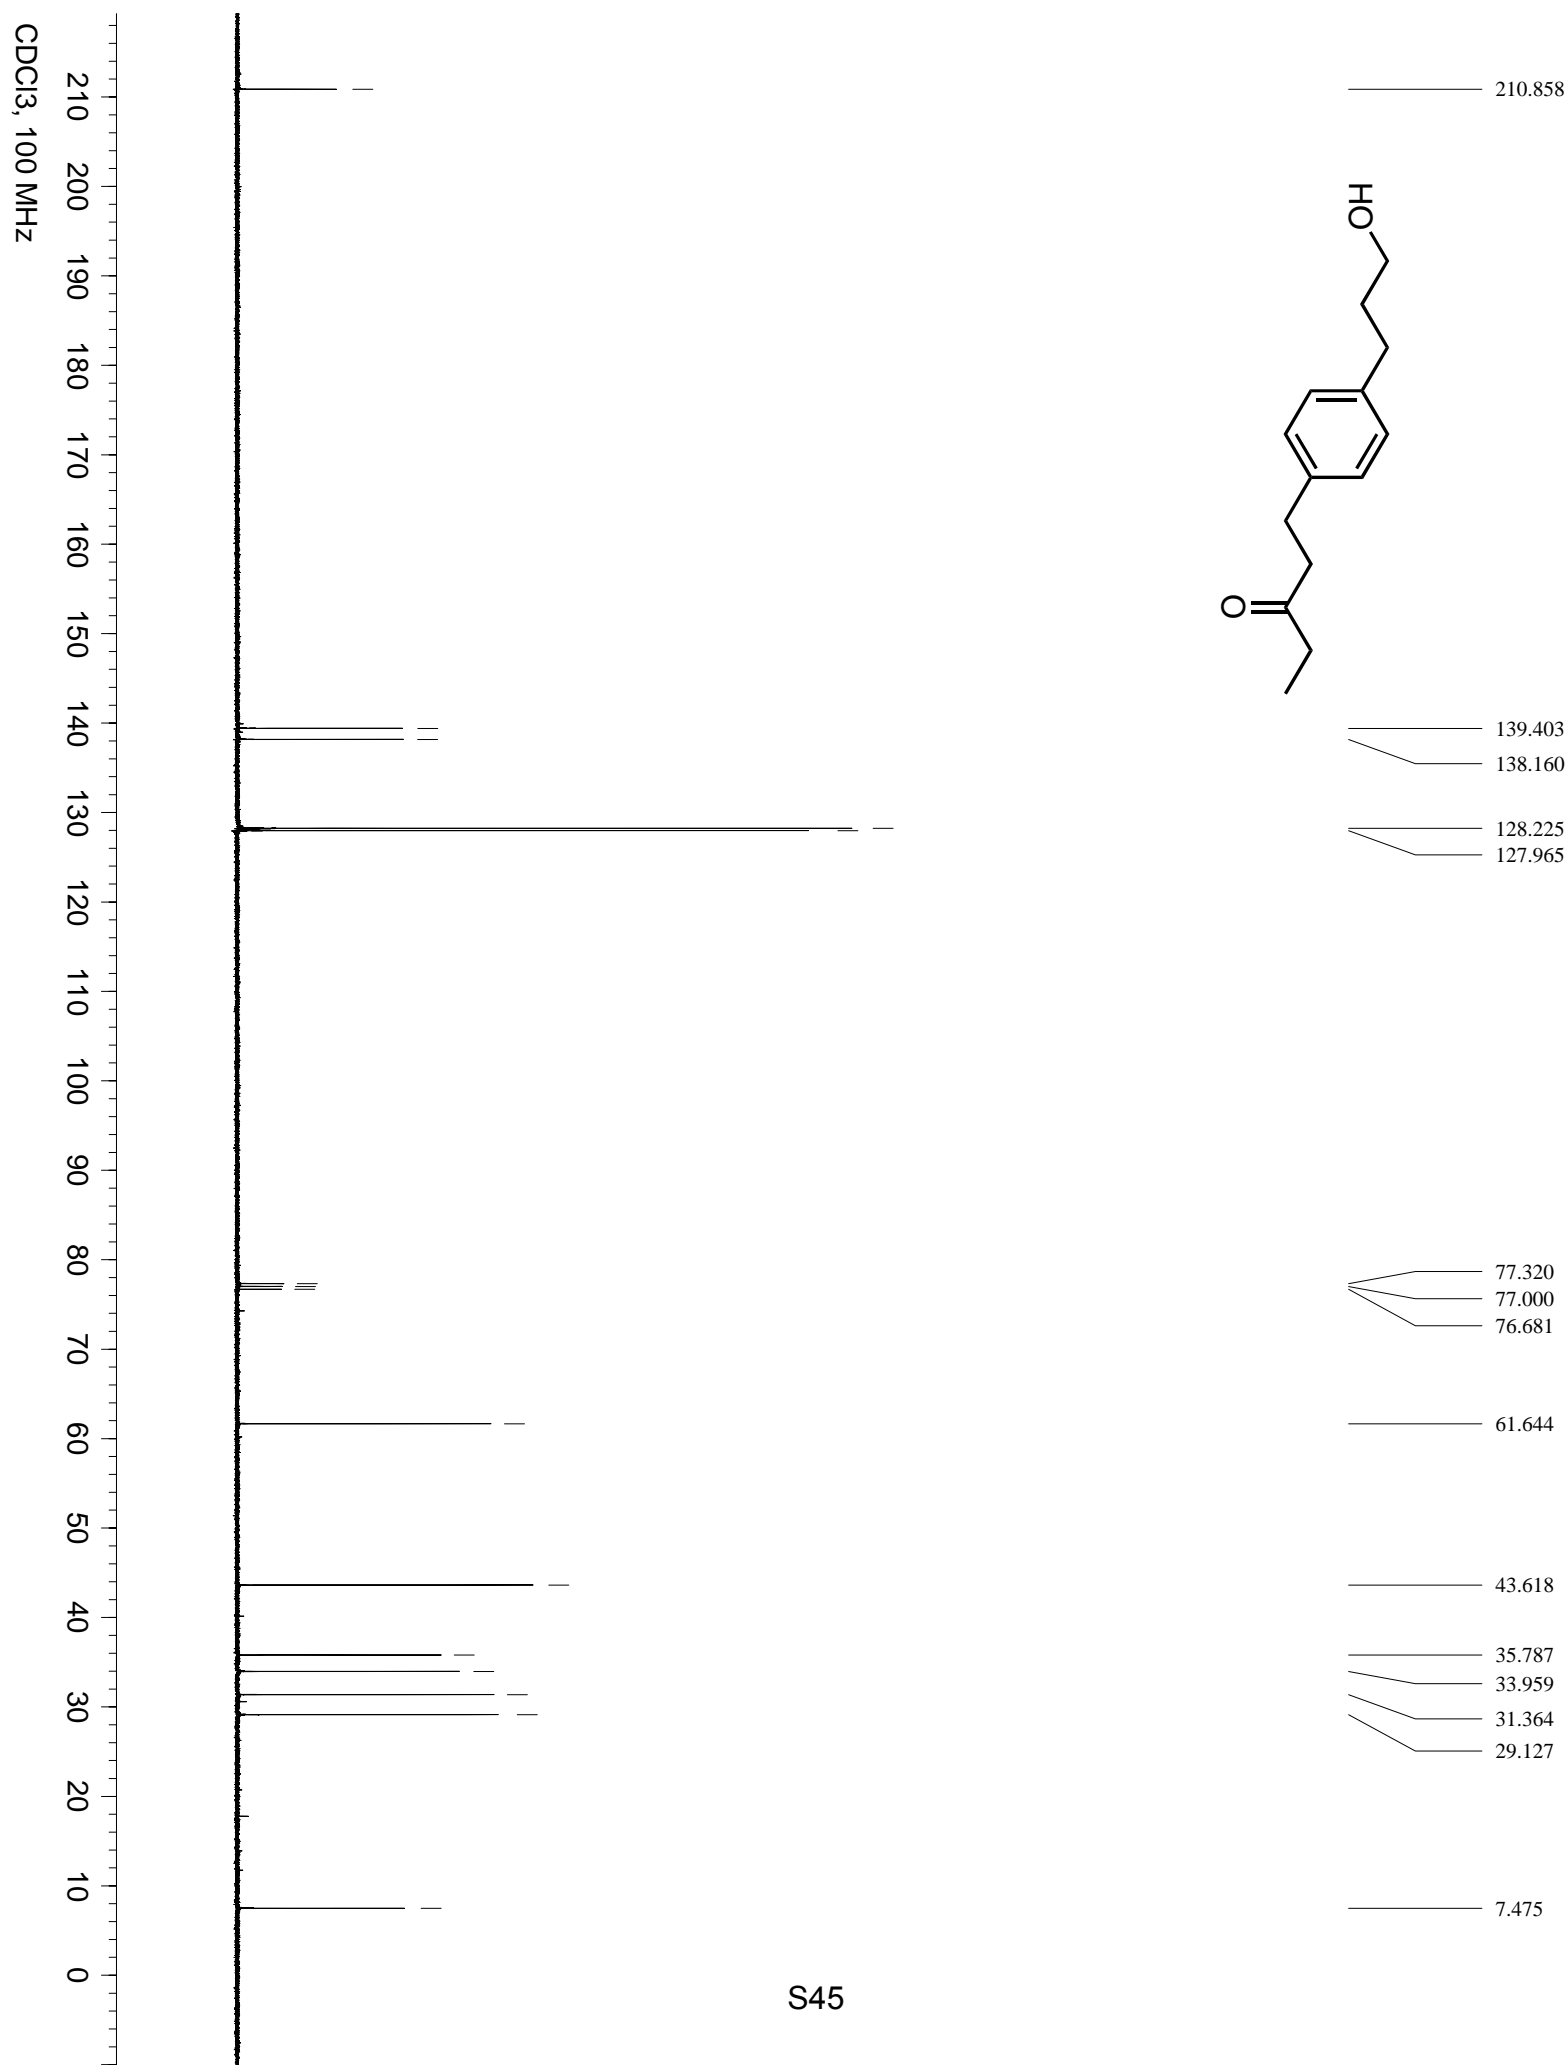

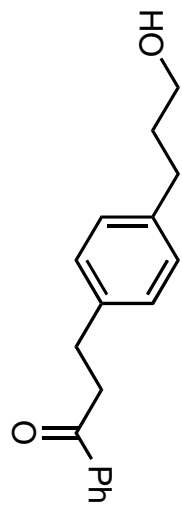

7.975  
7.951  
7.584  
7.559  
7.535  
7.477  
7.452  
7.428  
7.260  
7.198  
7.172  
7.154  
7.127

3.697  
3.675  
3.654  
3.319  
3.295  
3.268  
3.068  
3.042  
3.018  
2.712  
2.687  
2.661  
2.017  
2.016  
1.934  
1.912  
1.887  
1.862  
1.839

11.0  
10.0  
9.0  
8.0  
7.0  
6.0  
5.0  
4.0  
3.0  
2.0  
1.0  
0.0

1.99  
1.00  
2.01  
3.97

1.97  
2.00  
1.99  
1.98  
1.01  
1.98

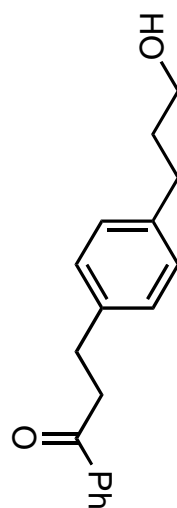

199.363

139.538  
138.589  
136.687  
132.992  
128.502  
128.481  
128.339  
127.944

77.424  
77.000  
76.576

62.109

40.421  
34.149  
31.548  
29.601

7

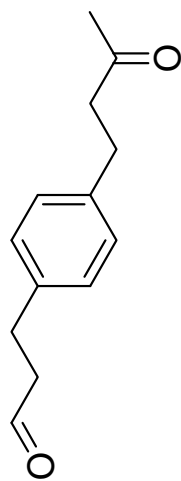

9.805

7.260

7.105

2.935

2.917

2.898

2.872

2.855

2.836

2.775

2.757

2.738

2.719

2.134

CDCl<sub>3</sub>, 400 MHz

0.94

3.99

2.83

4.00

2.97



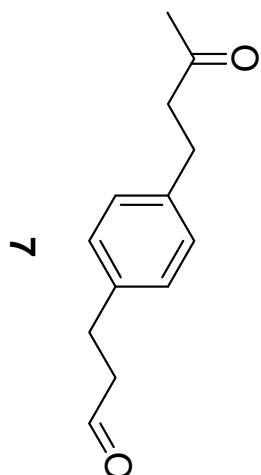

|         |  |
|---------|--|
| 207.914 |  |
| 201.613 |  |
| 138.884 |  |
| 137.986 |  |
| 128.446 |  |
| 128.337 |  |
| 77.318  |  |
| 77.000  |  |
| 76.682  |  |
| 45.220  |  |
| 45.081  |  |
| 30.024  |  |
| 29.157  |  |
| 27.585  |  |

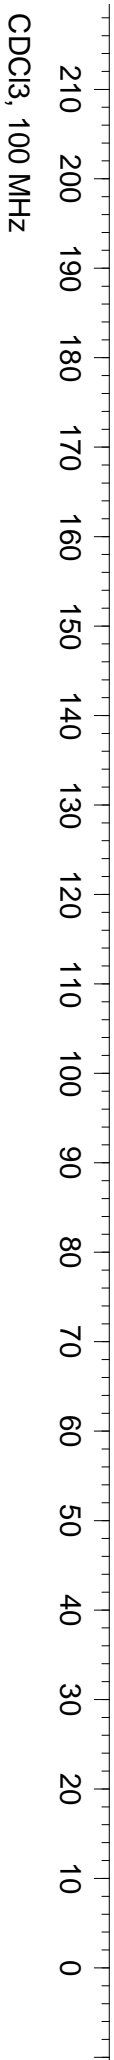

8

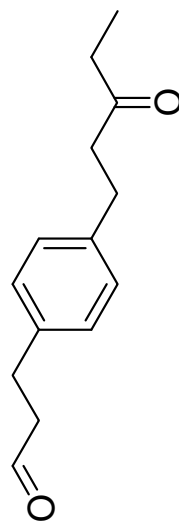

9.753

7.260

7.089

7.077

2.898

2.880

2.861

2.849

2.830

2.811

2.735

2.716

2.703

2.684

2.665

2.639

2.618

2.600

2.405

2.386

2.368

2.350

1.023

1.005

0.987

0.93

3.99

4.00

4.00

1.97

3.01

CDCl<sub>3</sub>, 100 MHz

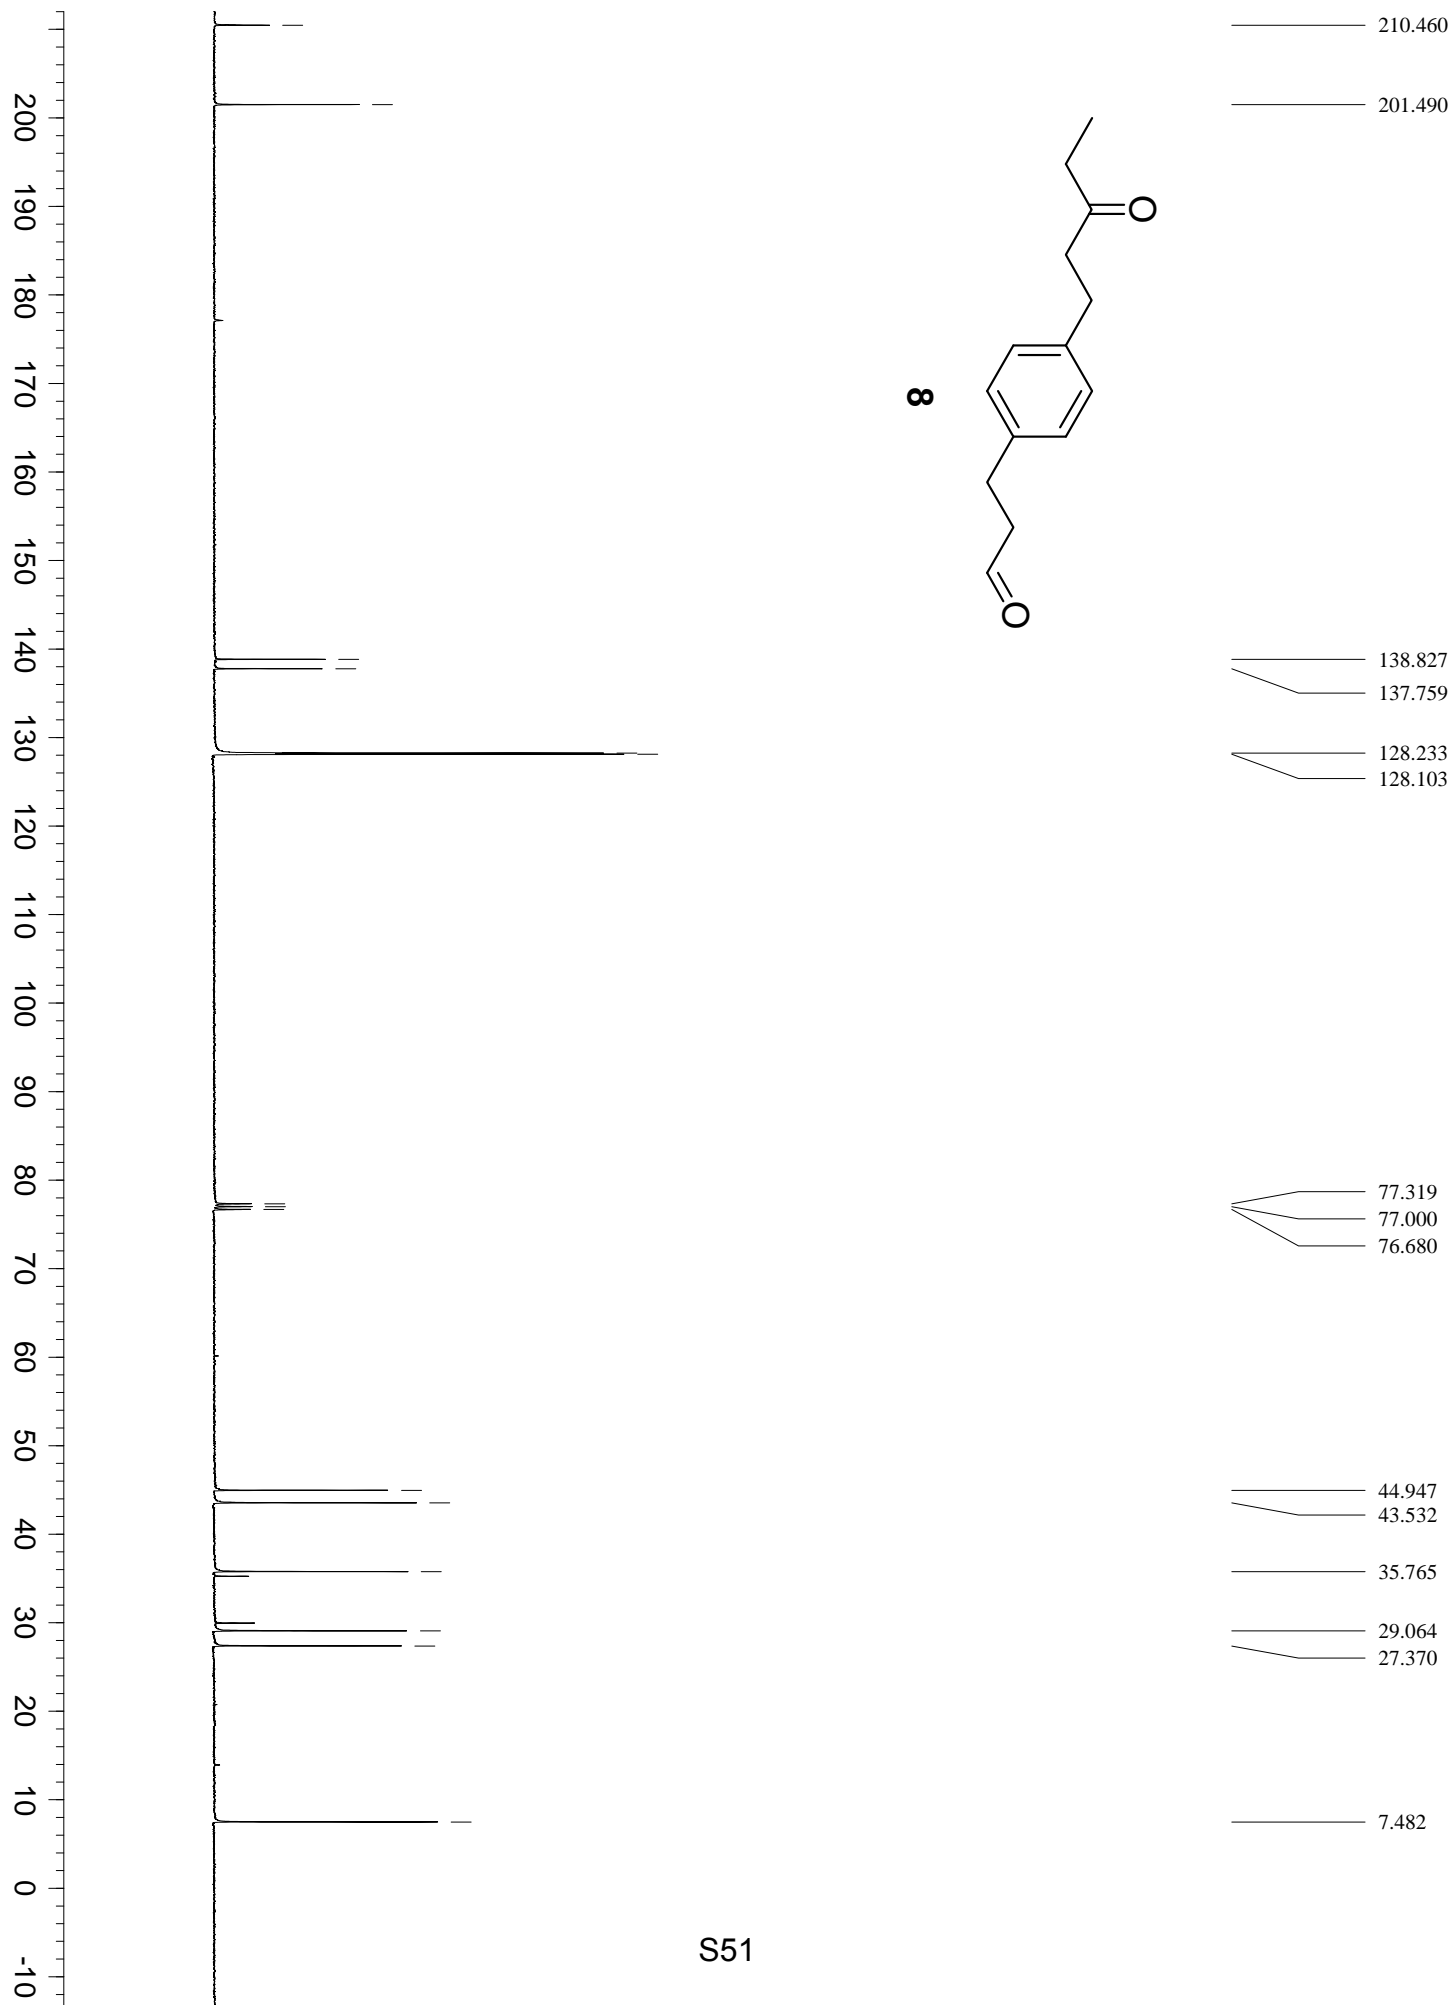

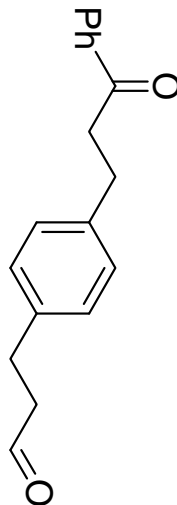

9

9.812

7.973

7.949

7.584

7.559

7.535

7.478

7.452

7.428

7.260

7.209

7.182

7.145

7.118

3.316

3.292

3.266

3.068

3.041

3.017

2.960

2.935

2.910

2.791

2.766

2.742

0.81

1.96

0.69

2.00

3.95

1.97

2.01

1.97

1.97

CDCl<sub>3</sub>, 300 MHz

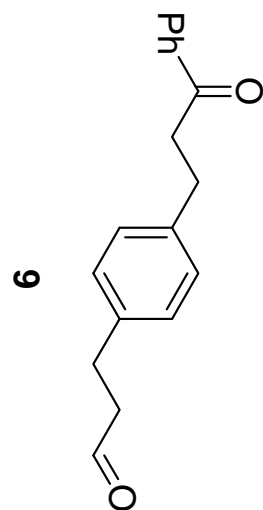

201.631  
199.120

139.160  
137.990  
136.686  
132.994  
128.566  
128.509  
128.350  
127.932

77.421  
77.000  
76.577

45.204  
40.320

29.545  
27.599

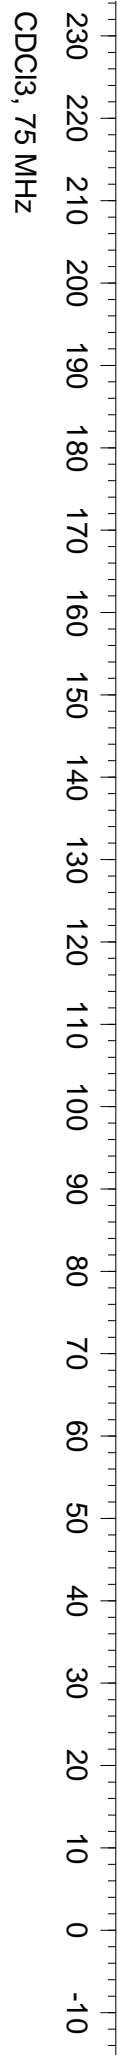

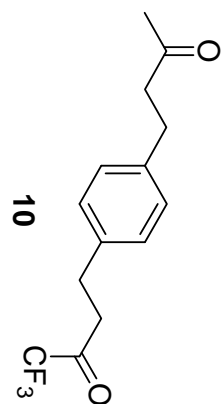

7.260  
7.117

3.047  
3.025  
3.004  
2.964  
2.942  
2.919  
2.888  
2.859  
2.832  
2.765  
2.742  
2.720  
2.134

4.00

2.03  
2.05  
2.07  
1.98

2.99

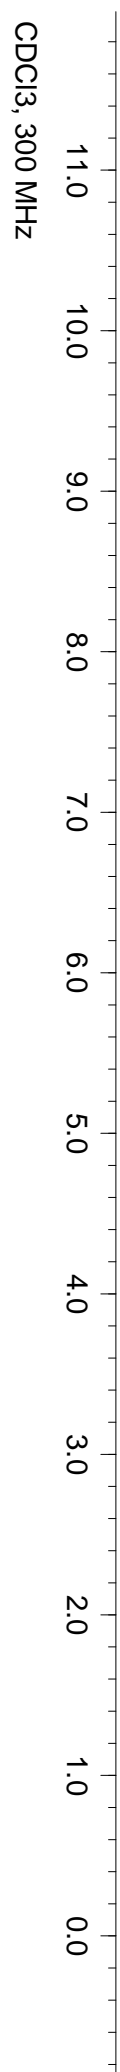

CDCI<sub>3</sub>, 100 MHz

210 200 190 180 170 160 150 140 130 120 110 100 90 80 70 60 50 40 30 20 10 0

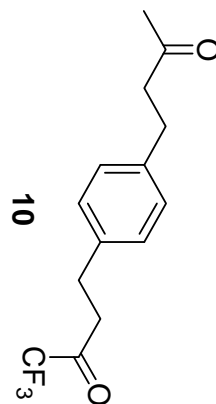

208.077

191.109

190.758

190.409

190.059

139.265

136.911

128.535

128.287

119.776

116.874

113.972

111.069

77.318

77.000

76.682

44.971

37.970

29.904

29.162

27.754

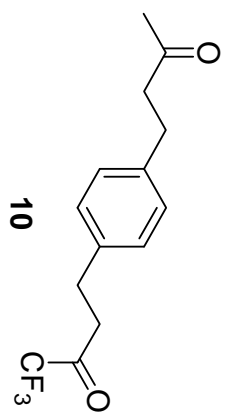

10

-79.661

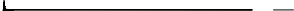



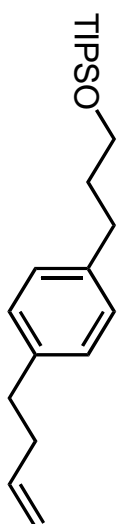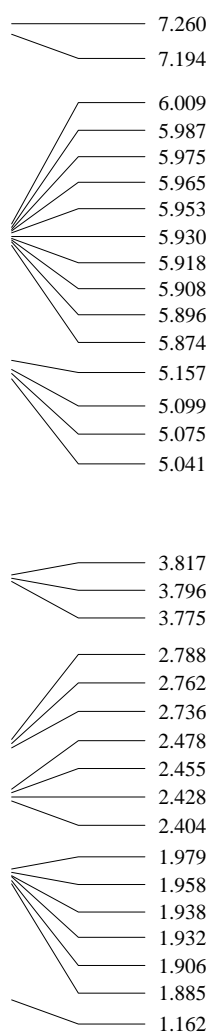

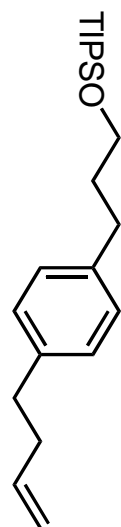

139.731  
139.059  
138.177

128.386  
128.279

114.755

77.317  
77.000  
76.682

62.624

35.609  
34.998  
34.747  
31.708

18.045

12.046

S58

CDCI<sub>3</sub>, 100 MHz

210 200 190 180 170 160 150 140 130 120 110 100 90 80 70 60 50 40 30 20 10 0

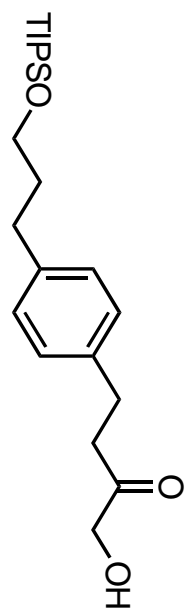

7.268  
7.156  
7.135  
7.106  
7.086

4.199  
4.188  
3.743  
3.727  
3.712  
3.186  
3.175  
3.164  
2.968  
2.949  
2.930  
2.744  
2.724  
2.714  
2.706  
2.695  
2.675  
1.890  
1.874  
1.858  
1.854  
1.851  
1.843  
1.835  
1.819  
1.110  
1.094  
1.083  
1.074

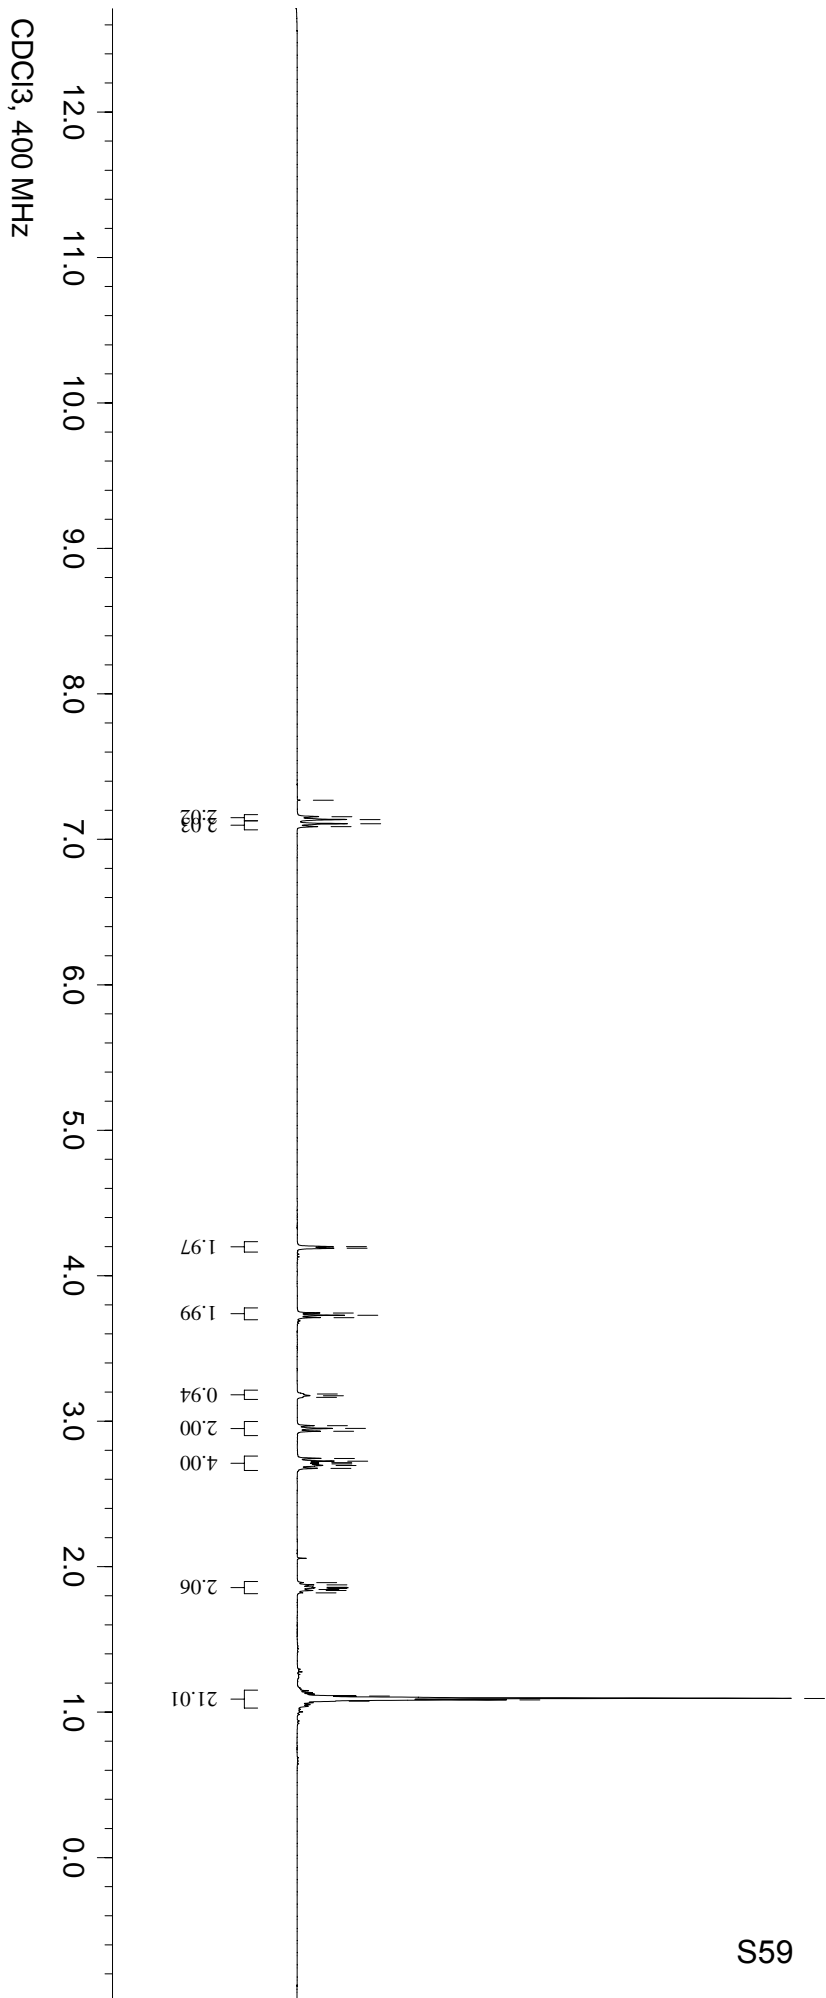

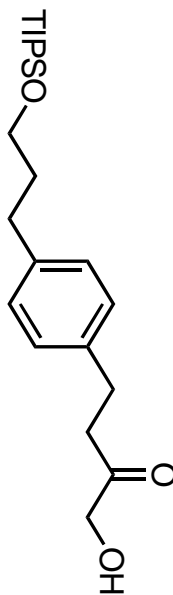

|         |  |
|---------|--|
| 208.897 |  |
| 140.406 |  |
| 137.296 |  |
| 128.648 |  |
| 128.016 |  |
| 77.318  |  |
| 77.000  |  |
| 76.682  |  |
| 68.265  |  |
| 62.458  |  |
| 39.938  |  |
| 34.598  |  |
| 31.586  |  |
| 29.117  |  |
| 17.960  |  |
| 11.942  |  |

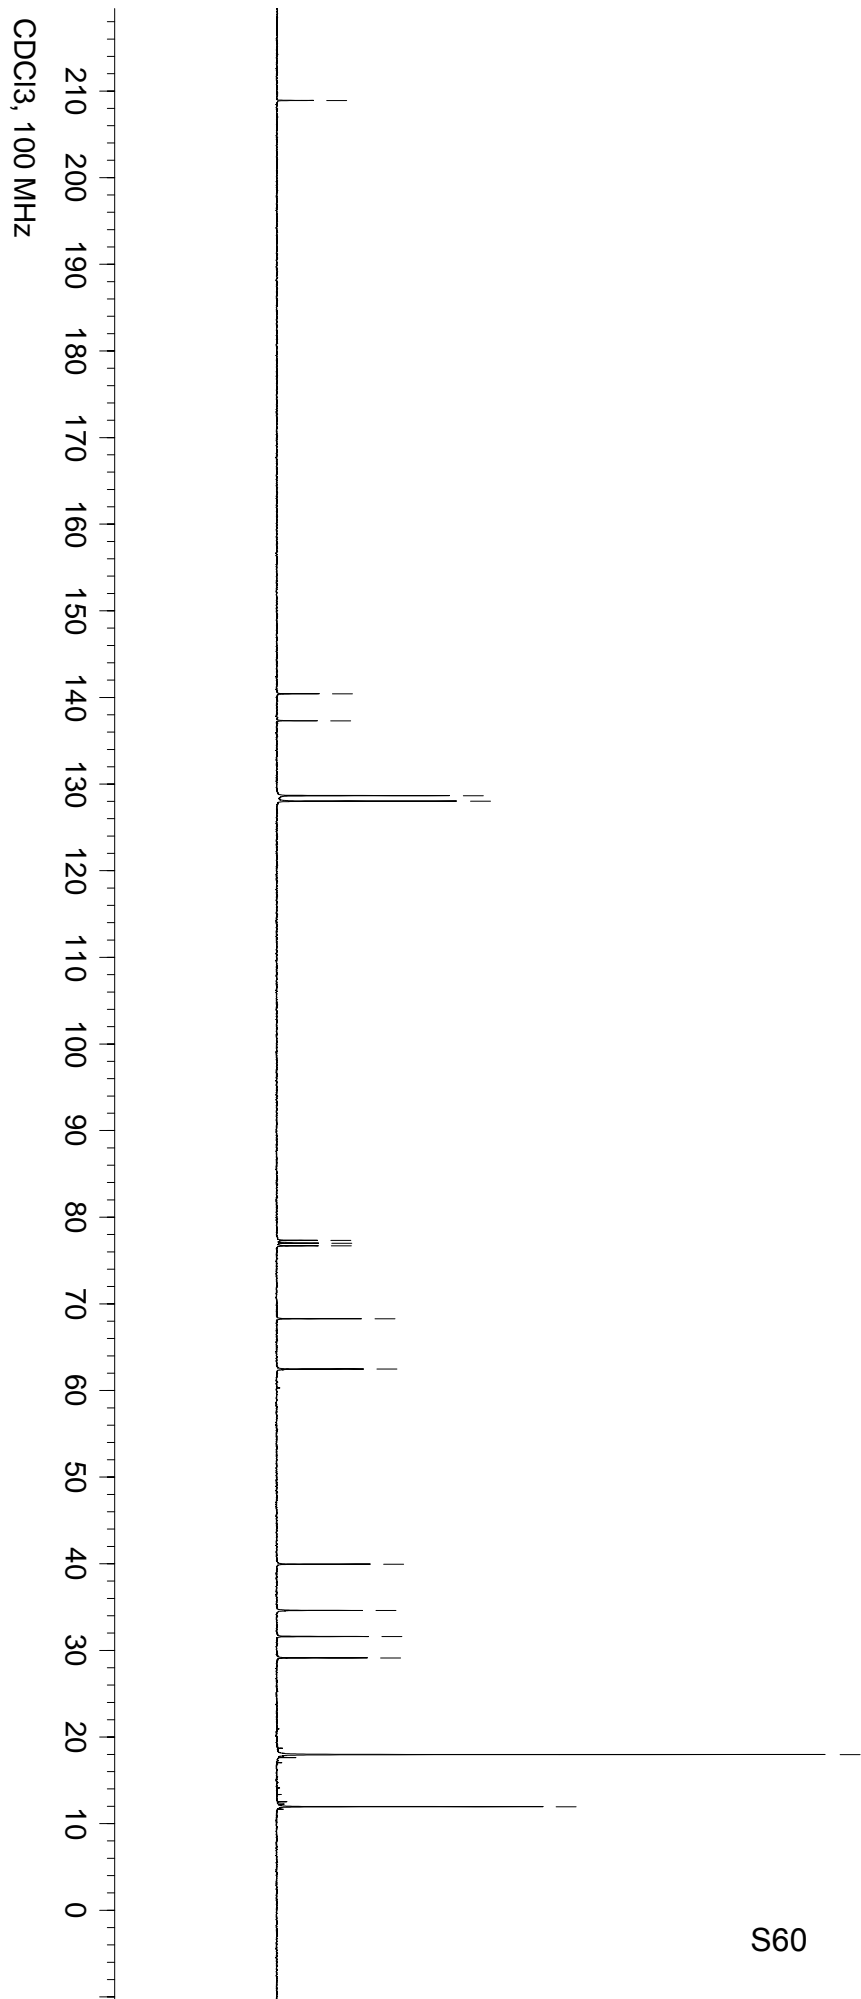

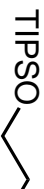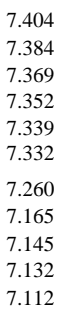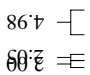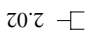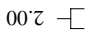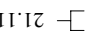

S61

CDCI<sub>3</sub>, 400 MHz

207.901

140.104  
137.940  
137.092  
128.518  
128.504  
128.398  
128.141  
127.887  
127.788

77.318  
77.000  
76.682  
75.065  
73.242

62.487

40.586

34.640

31.594

28.835

17.969

11.939

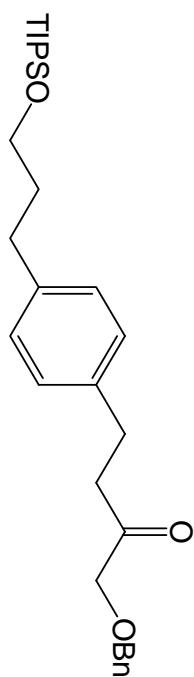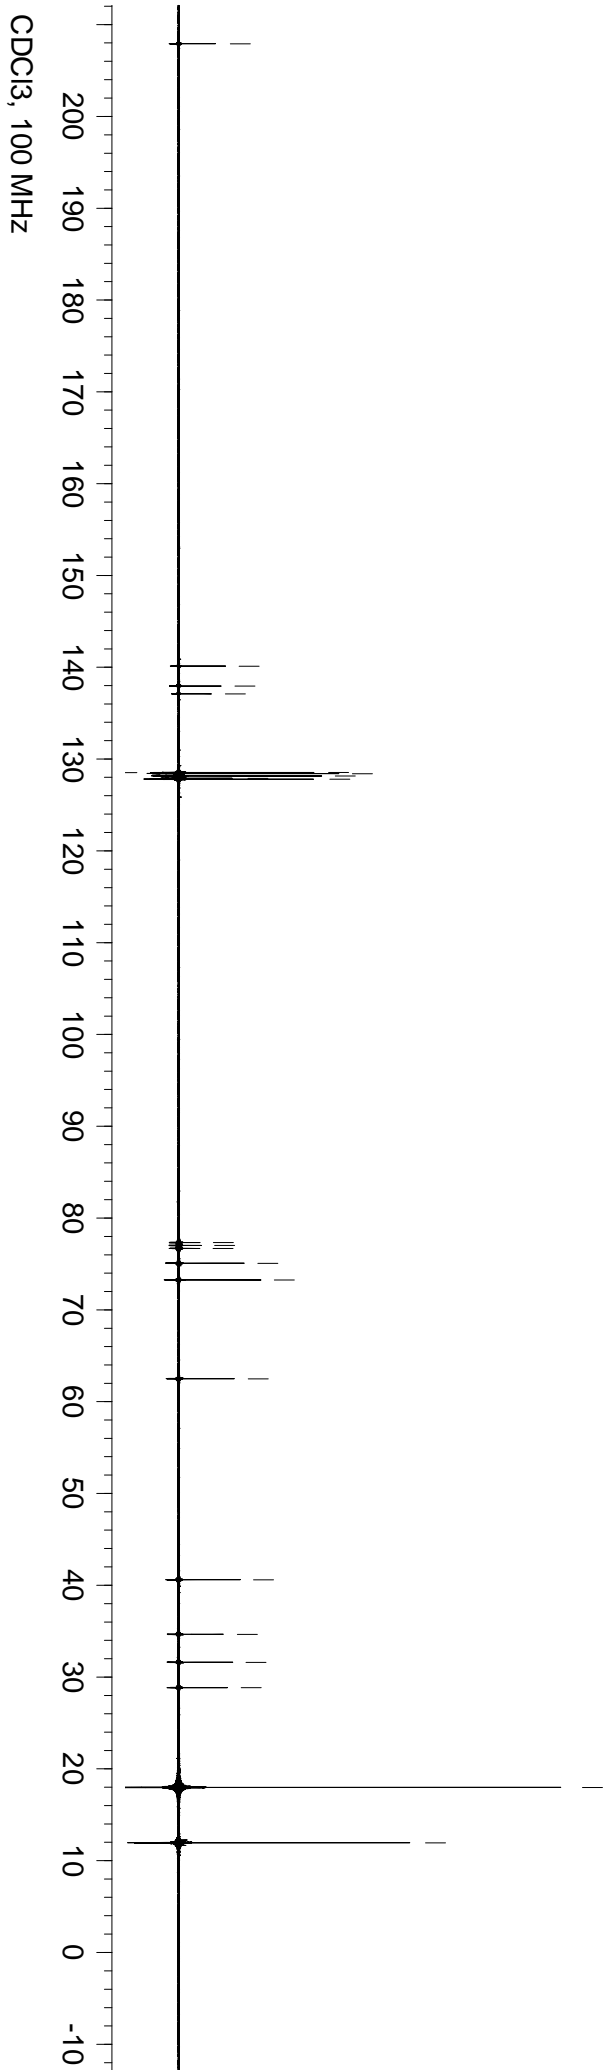

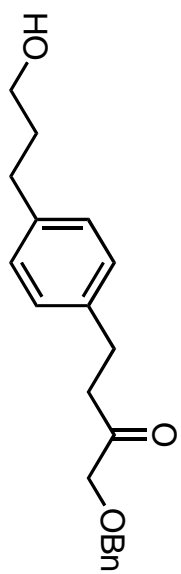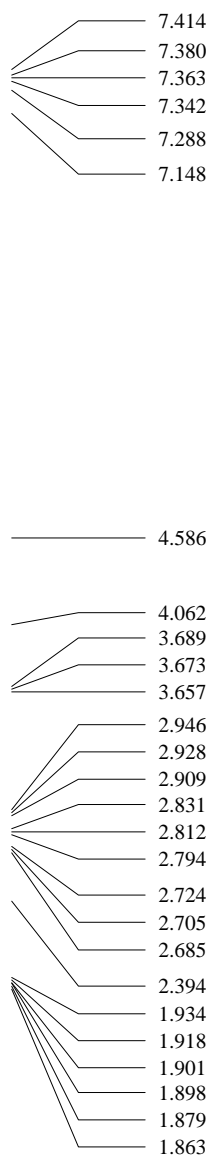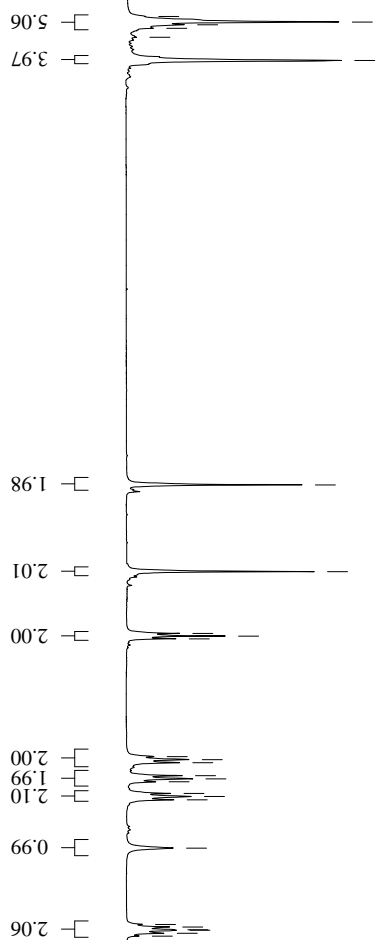

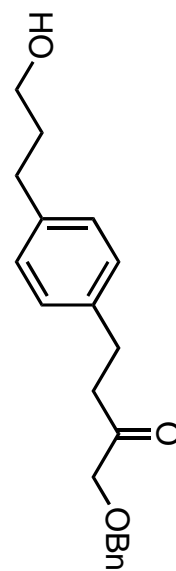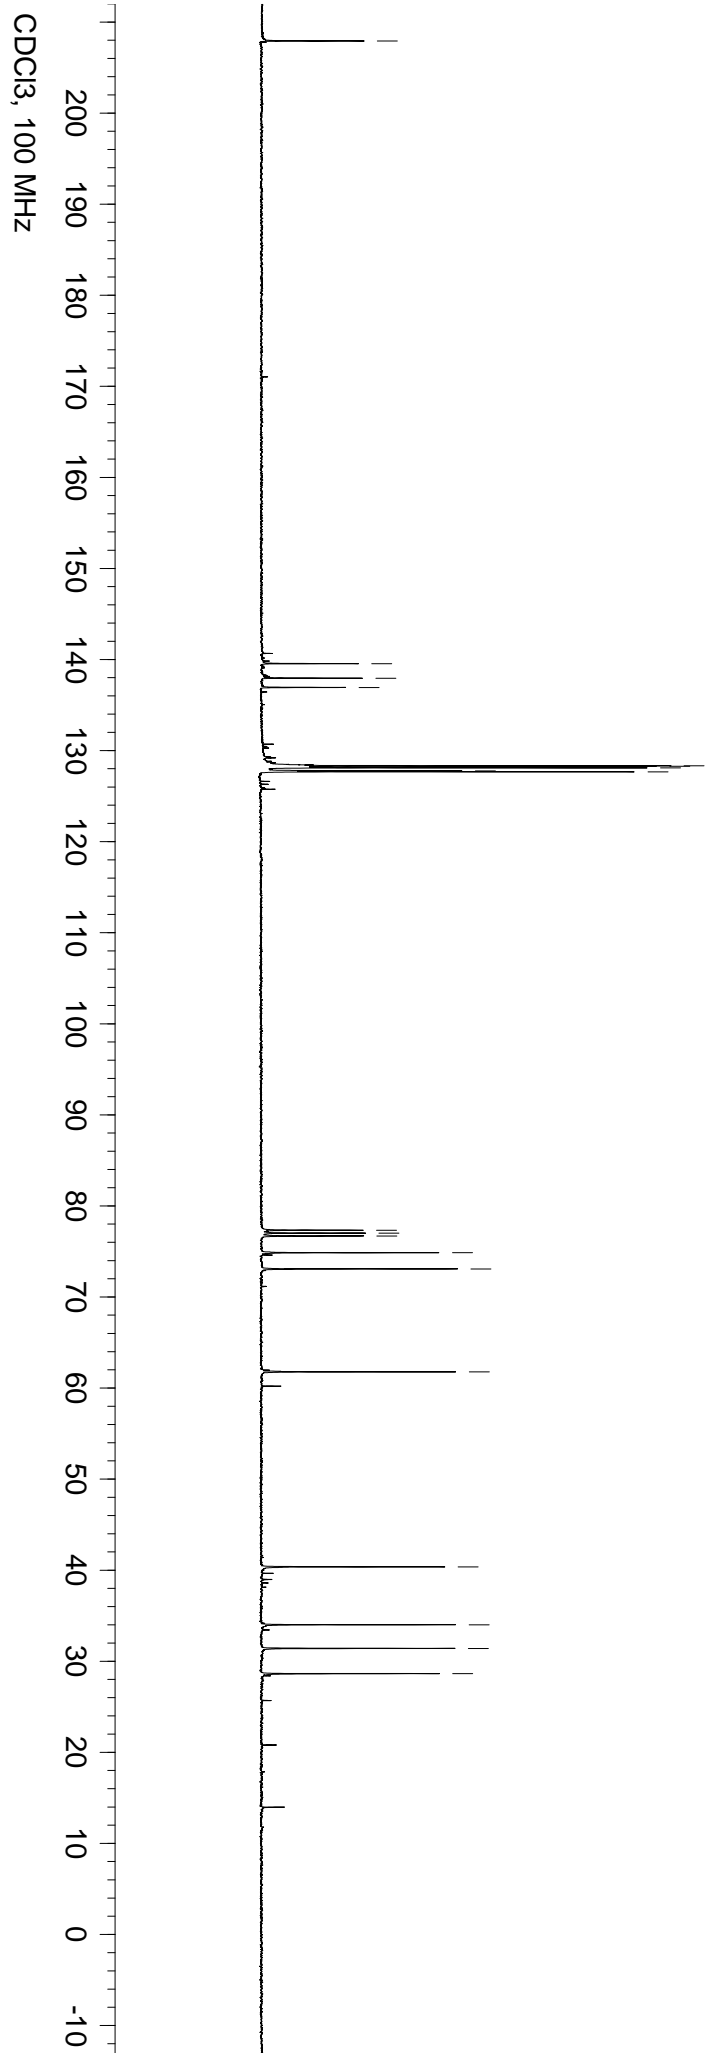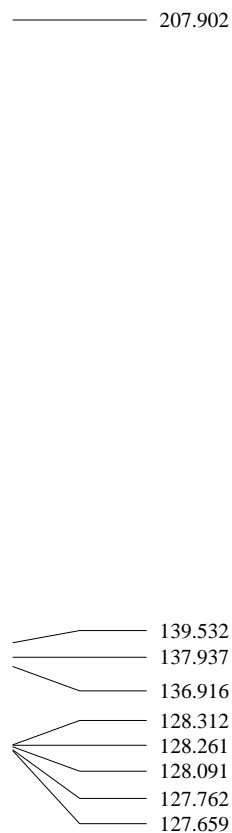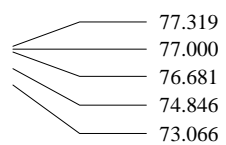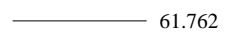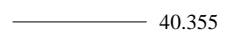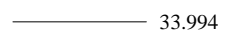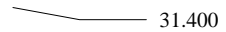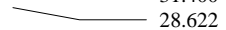



11

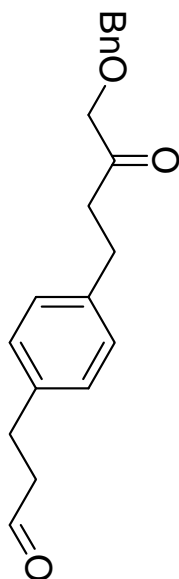

9.815  
9.810  
9.806

7.365  
7.335  
7.305  
7.260  
7.105

4.555

4.026

2.948  
2.921  
2.896  
2.884  
2.859  
2.802  
2.780  
2.757  
2.731

0.91

5.00  
3.96

1.99

2.00

4.04  
4.00

CDCl<sub>3</sub>, 300 MHz

11

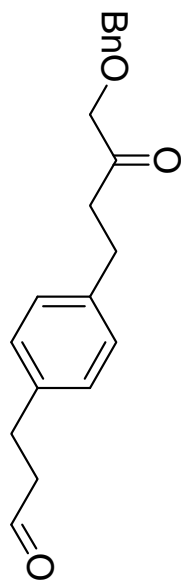

|         |  |
|---------|--|
| 207.888 |  |
| 201.501 |  |
| 138.746 |  |
| 138.067 |  |
| 137.073 |  |
| 128.507 |  |
| 128.445 |  |
| 128.346 |  |
| 127.952 |  |
| 127.826 |  |
| 77.318  |  |
| 77.000  |  |
| 76.682  |  |
| 75.084  |  |
| 73.300  |  |
| 45.187  |  |
| 40.501  |  |
| 28.742  |  |
| 27.619  |  |

CDCl<sub>3</sub>, 100 MHz

210 200 190 180 170 160 150 140 130 120 110 100 90 80 70 60 50 40 30 20 10 0

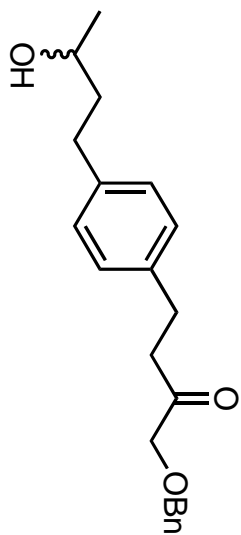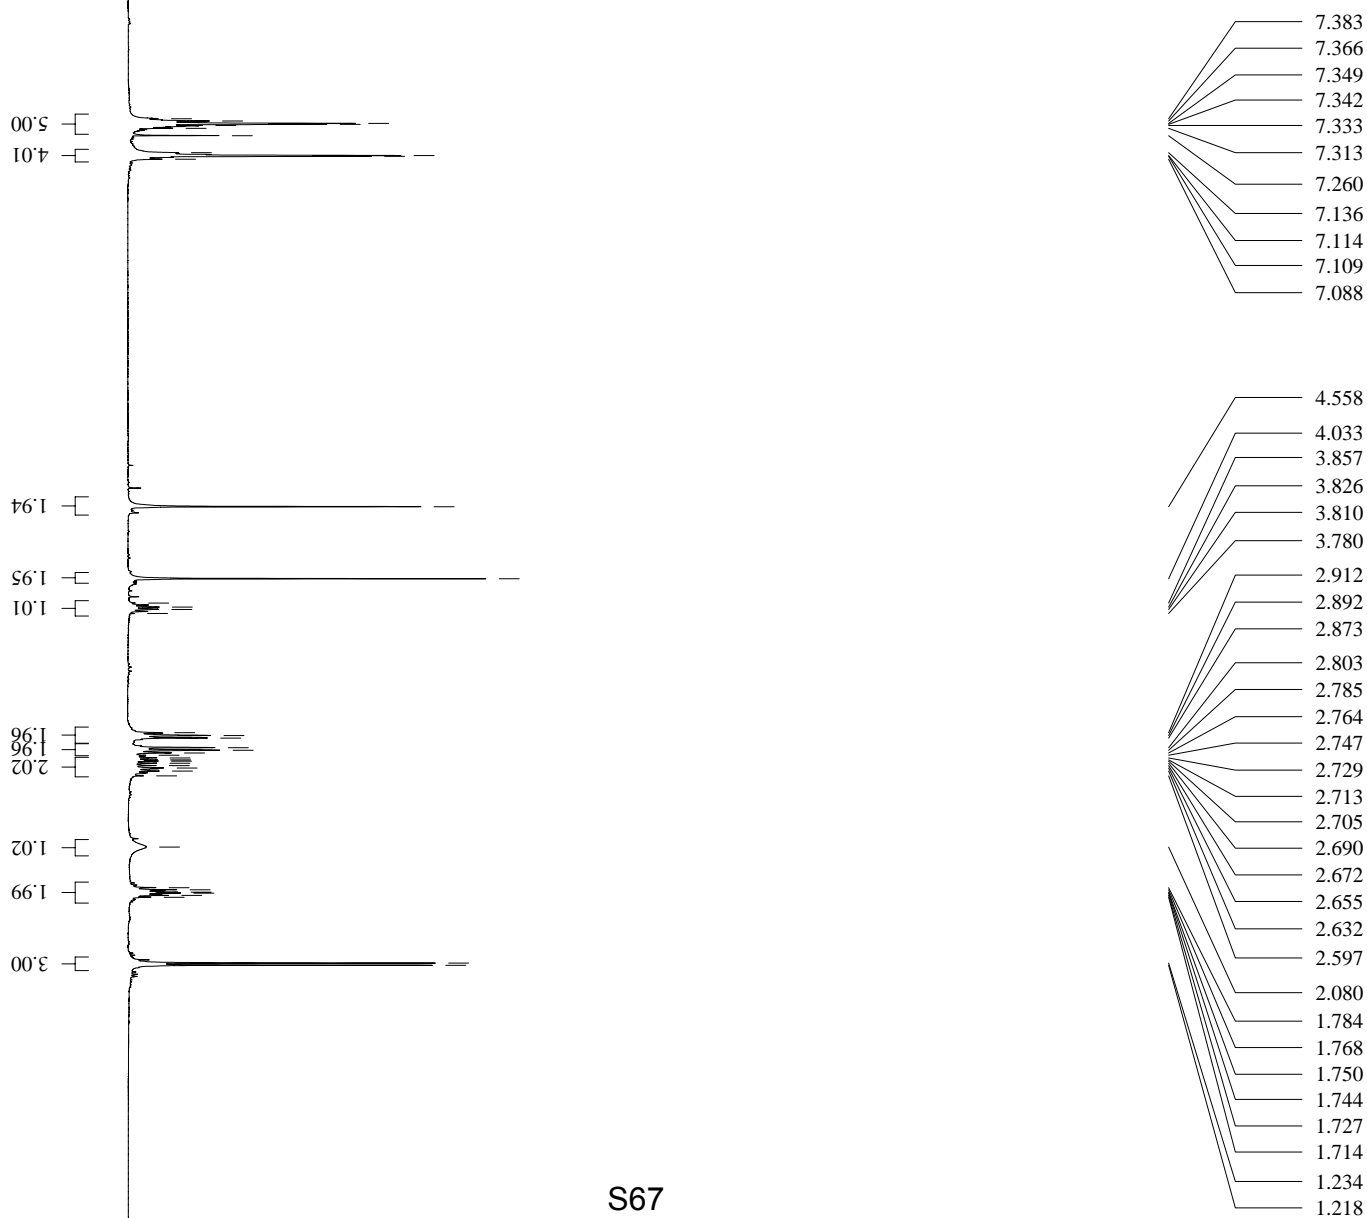

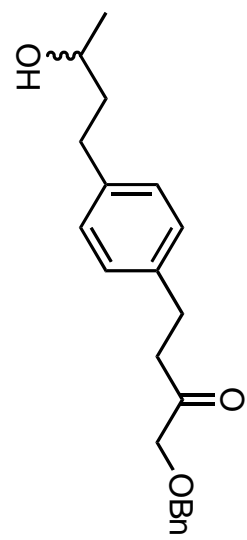

208.043

139.808  
138.097  
137.016  
128.425  
128.335  
128.277  
127.931  
127.821

77.426  
77.001  
76.577  
75.012  
73.236  
67.360

40.745  
40.555  
31.586  
28.762  
23.503

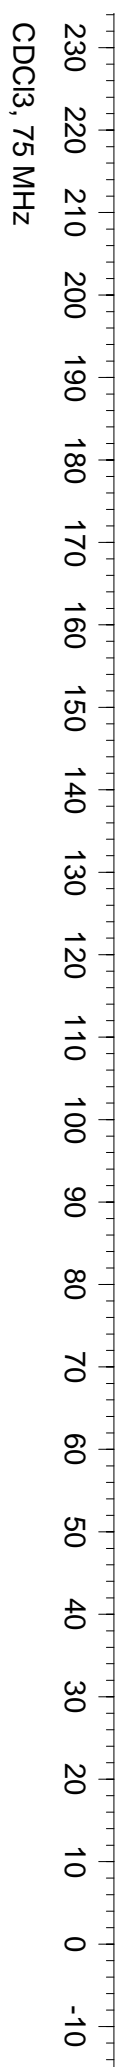

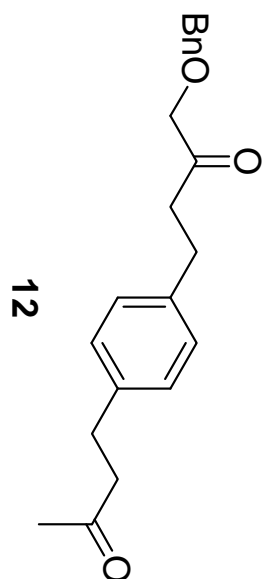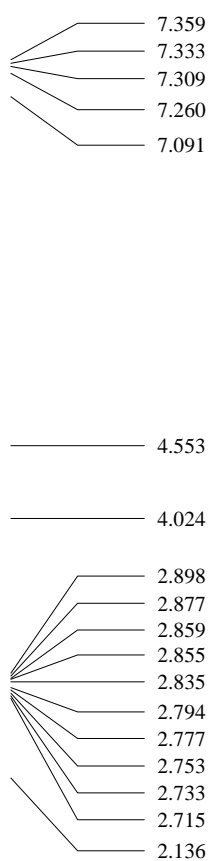

4.98

4.03

2.00

2.00

8.00

2.98

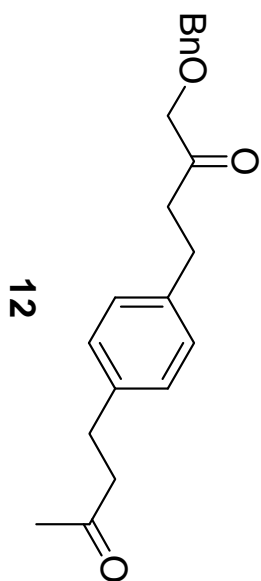

12

207.984

138.762  
138.526  
137.062  
128.488  
128.440  
128.390  
128.001  
127.874

77.318  
77.000  
76.682  
75.087  
73.312

45.158  
40.583

30.063  
29.219  
28.778

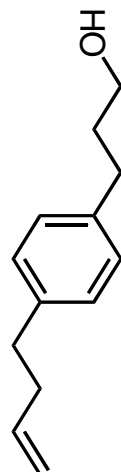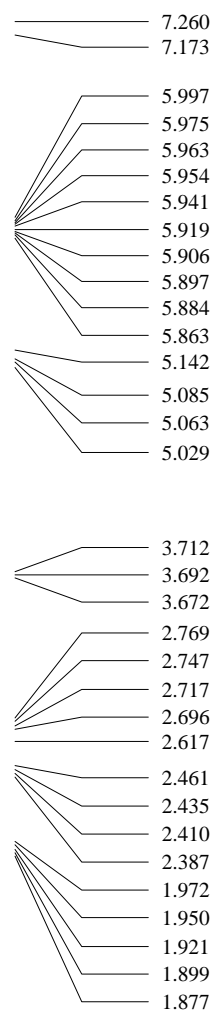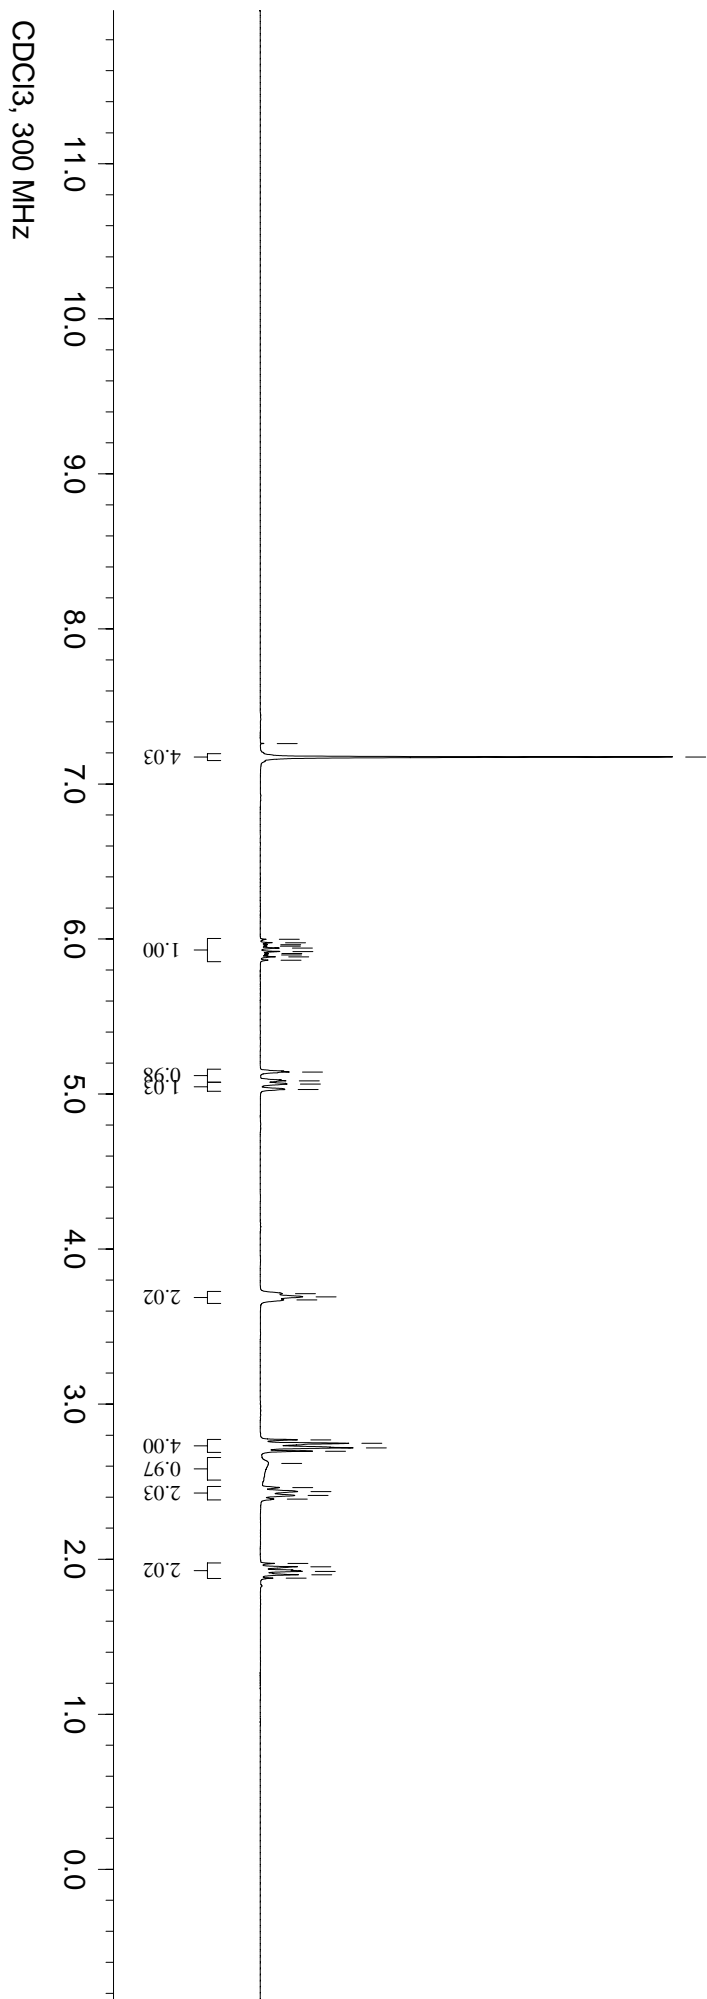

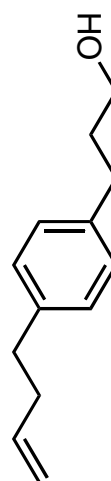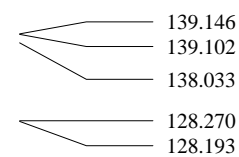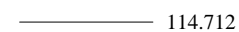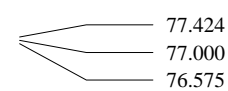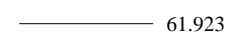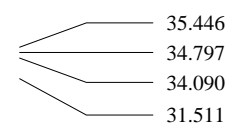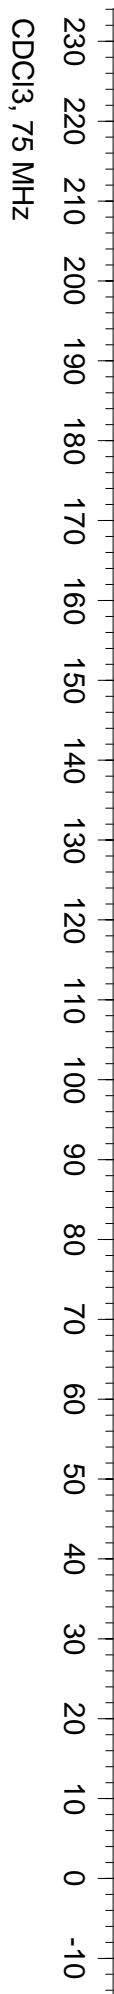



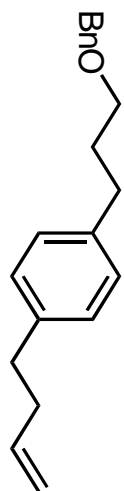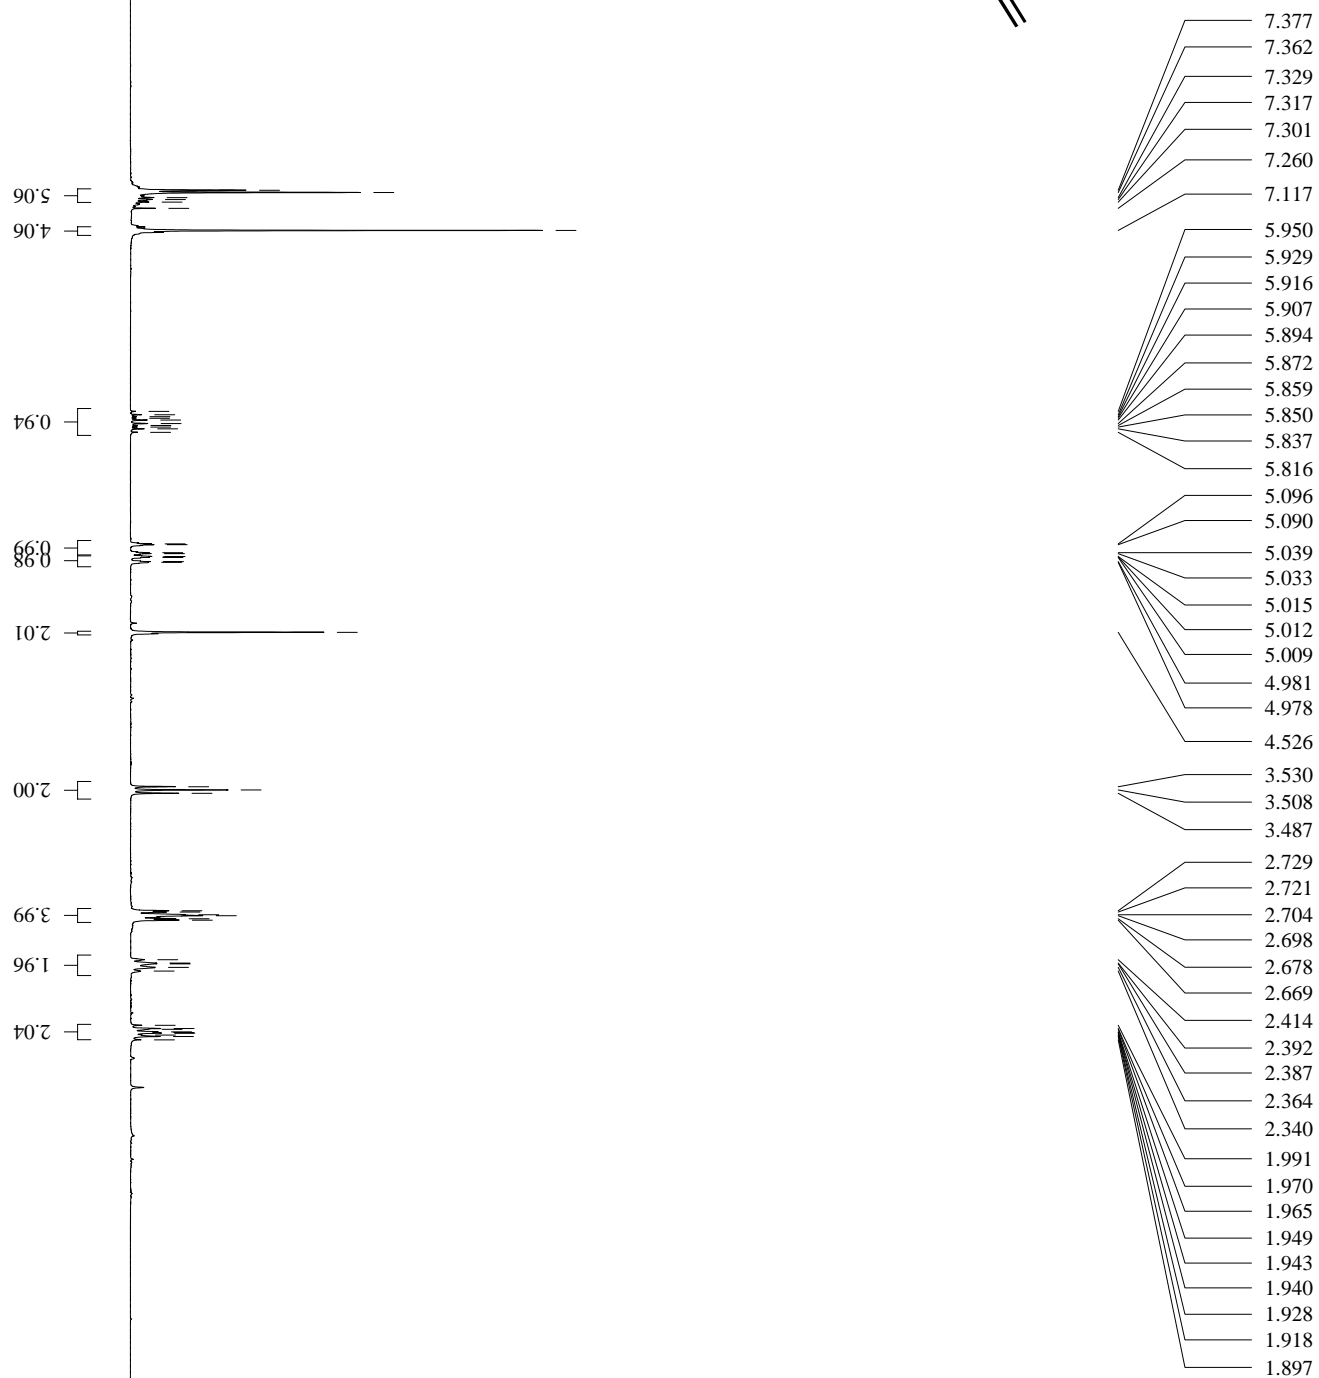

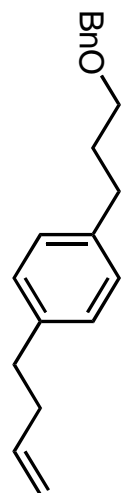

|         |
|---------|
| 139.343 |
| 139.197 |
| 138.553 |
| 138.201 |
| 128.362 |
| 128.334 |
| 128.316 |
| 127.641 |
| 127.494 |
| 114.778 |

|        |
|--------|
| 77.423 |
| 77.000 |
| 76.577 |
| 72.871 |
| 69.541 |

|        |
|--------|
| 35.562 |
| 34.927 |
| 31.924 |
| 31.383 |

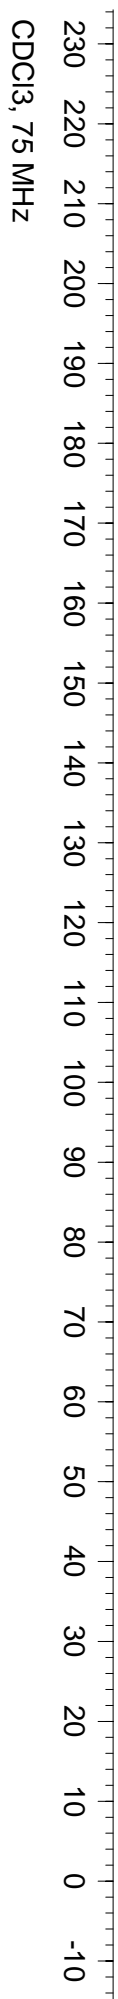

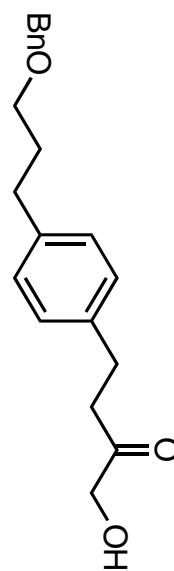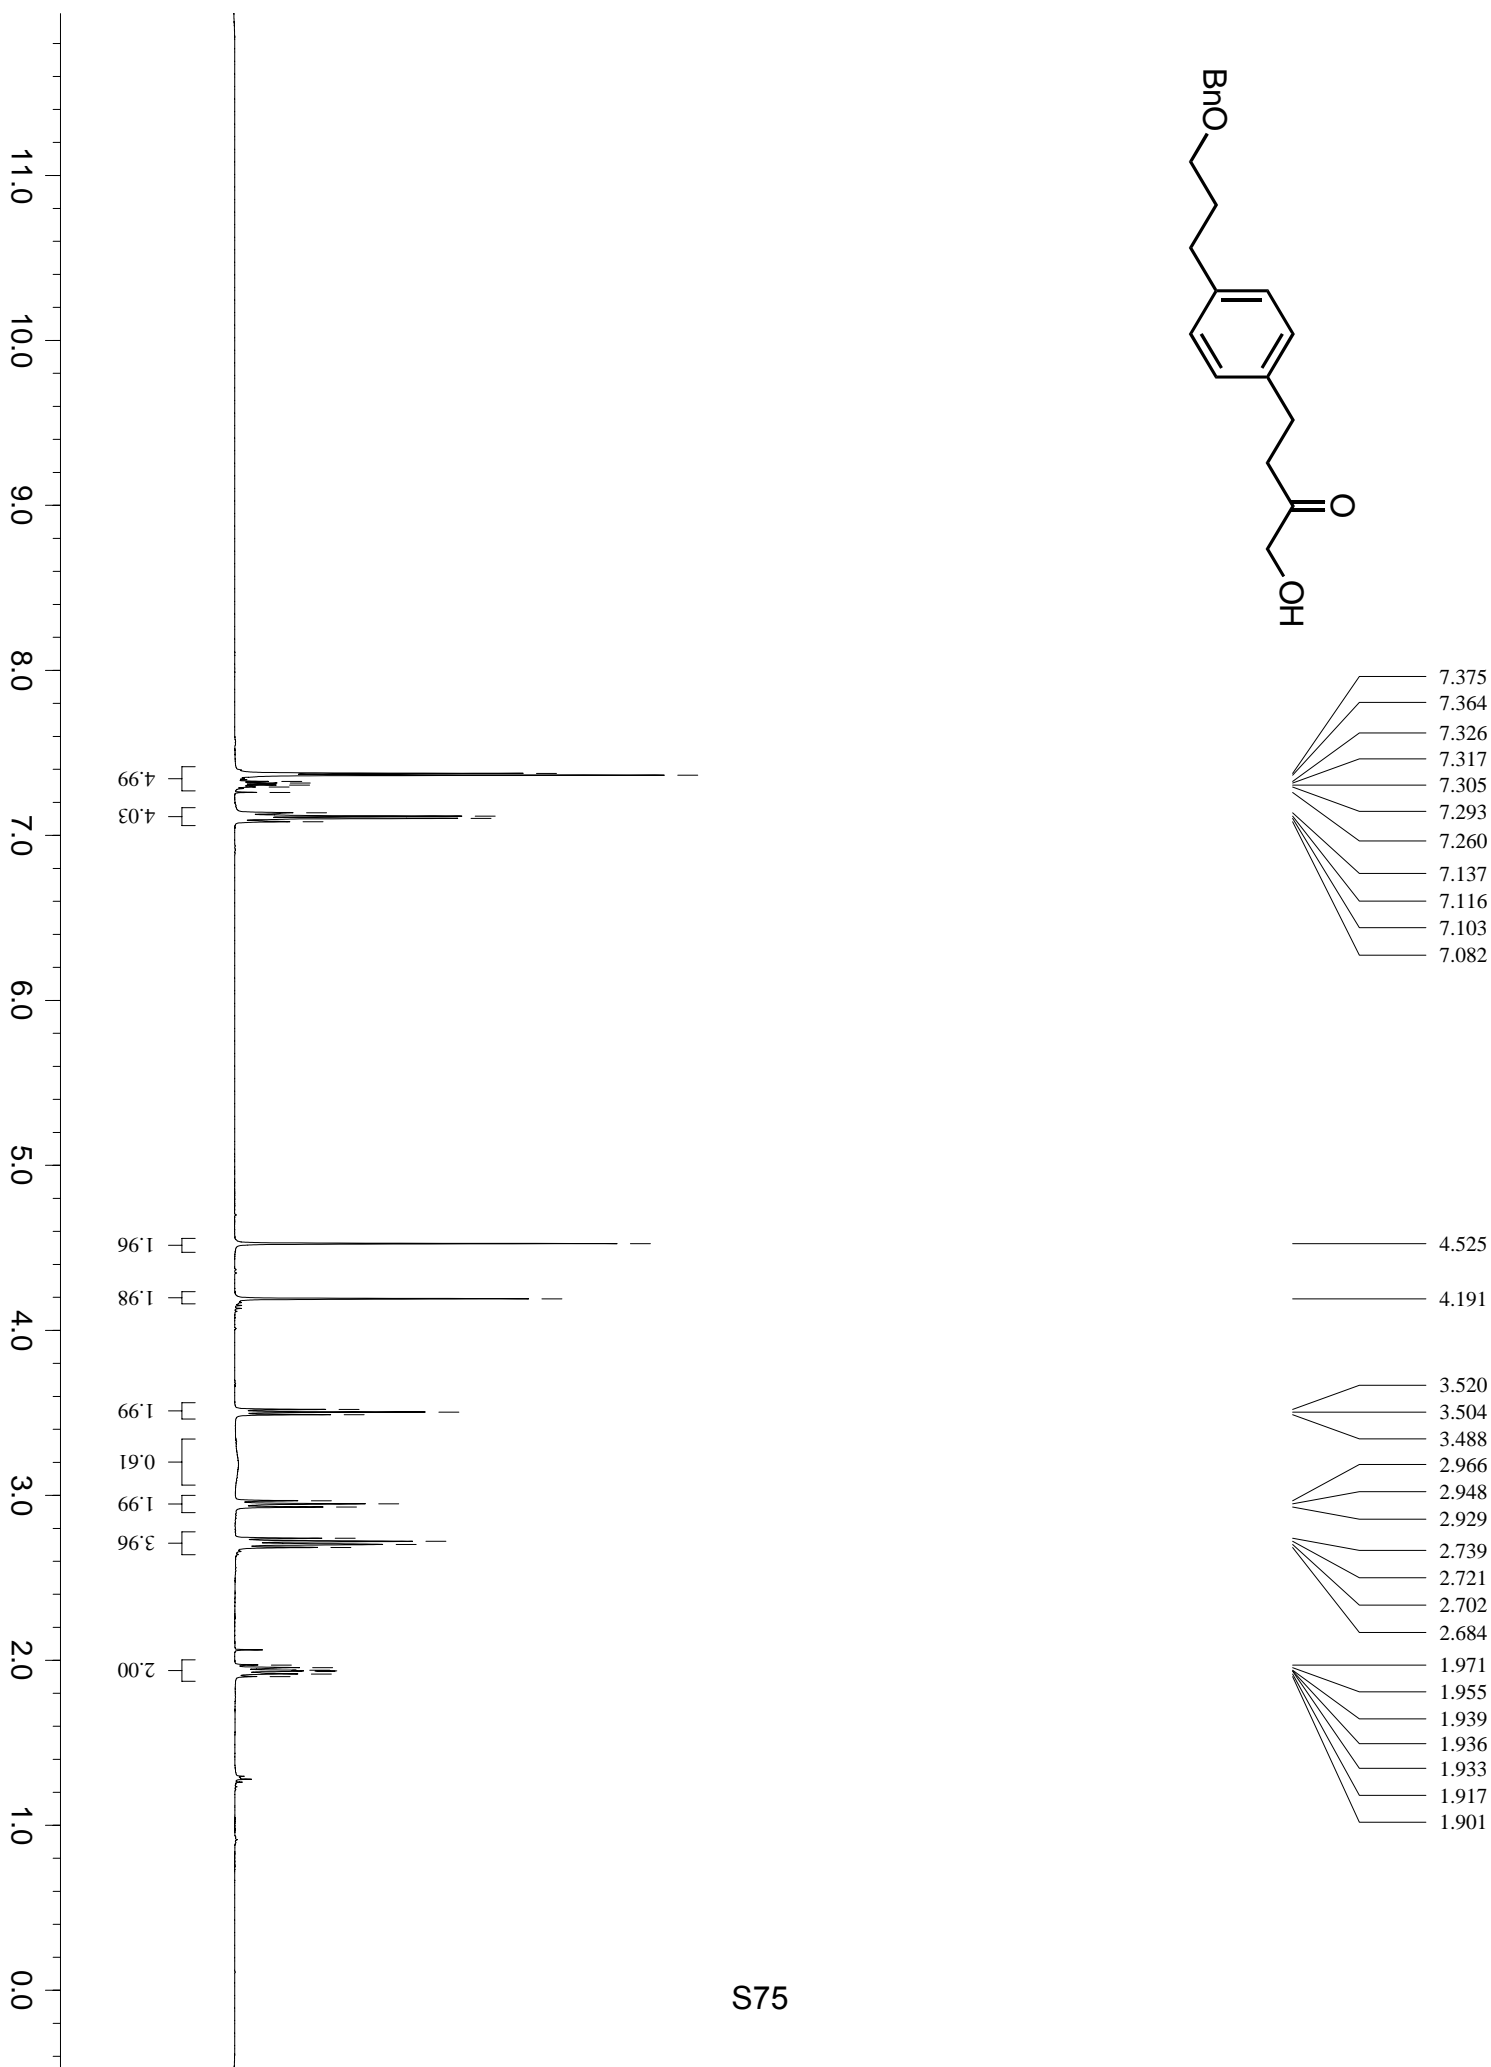

208.913

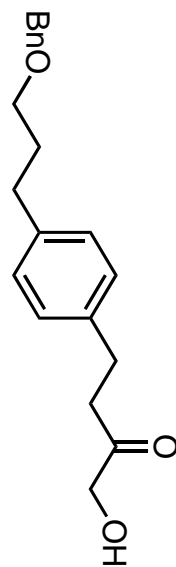

140.009

138.451

137.407

128.634

128.275

128.076

127.578

127.450

77.318

77.000

76.682

72.807

69.382

68.251

39.890

31.836

31.273

29.061

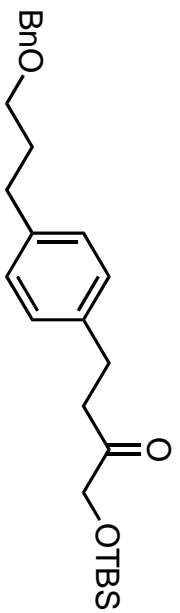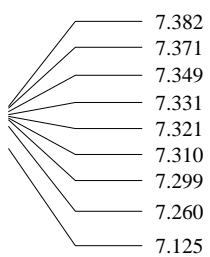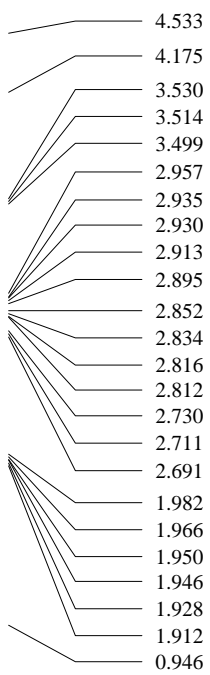

0.099

S77

11.0 10.0 9.0 8.0 7.0 6.0 5.0 4.0 3.0 2.0 1.0 0.0

5.00  
4.03

1.98  
1.99

1.99

1.99  
2.03  
2.01

2.01

9.09

5.90

CDCl<sub>3</sub>, 400 MHz

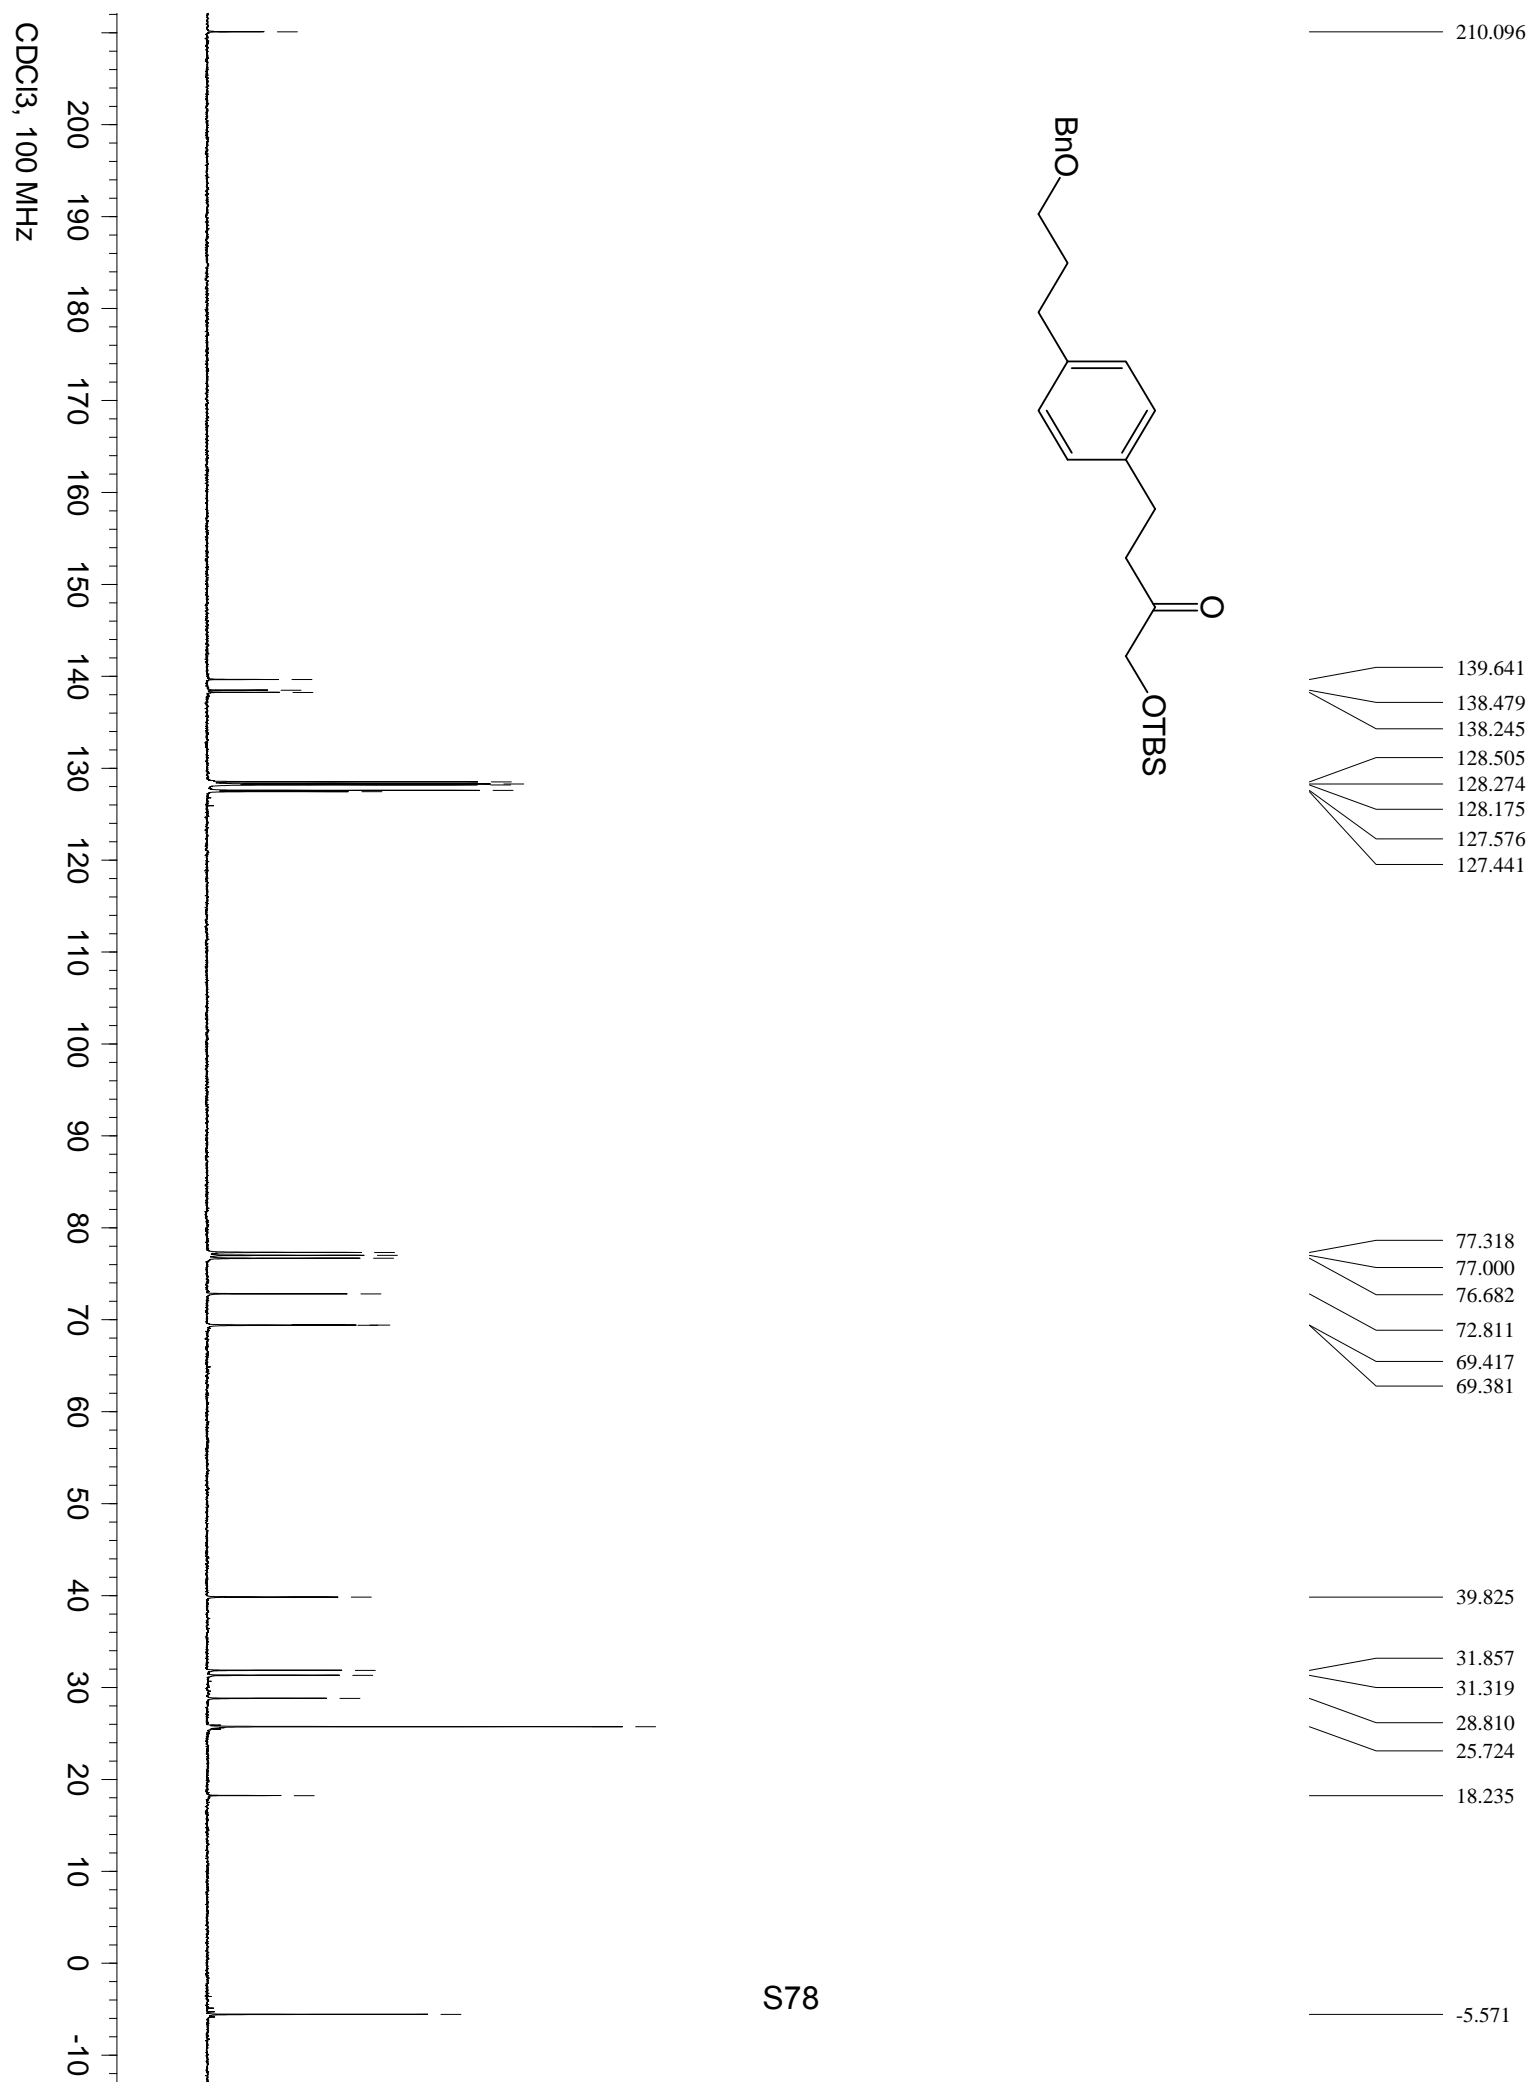

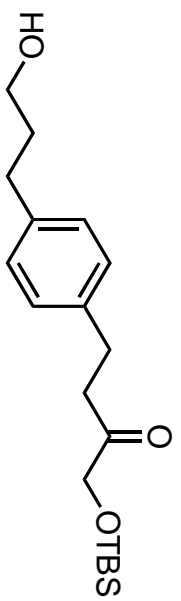

7.260  
7.132  
7.112  
7.093  
7.073

4.187  
4.176  
3.649  
3.634  
3.618  
3.242  
3.230  
3.218  
2.951  
2.932  
2.913  
2.730  
2.711  
2.692  
2.665  
2.646  
2.626  
1.853  
1.837  
1.822  
1.817  
1.814  
1.806  
1.798  
1.783  
0.919  
0.062

S79

4.03

1.96

2.03

0.98

1.98

2.04

2.03

9.02

6.00

11.0 10.0 9.0 8.0 7.0 6.0 5.0 4.0 3.0 2.0 1.0 0.0

CDCl<sub>3</sub>, 400 MHz

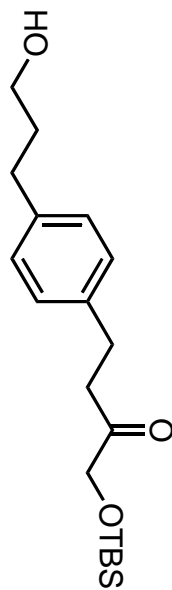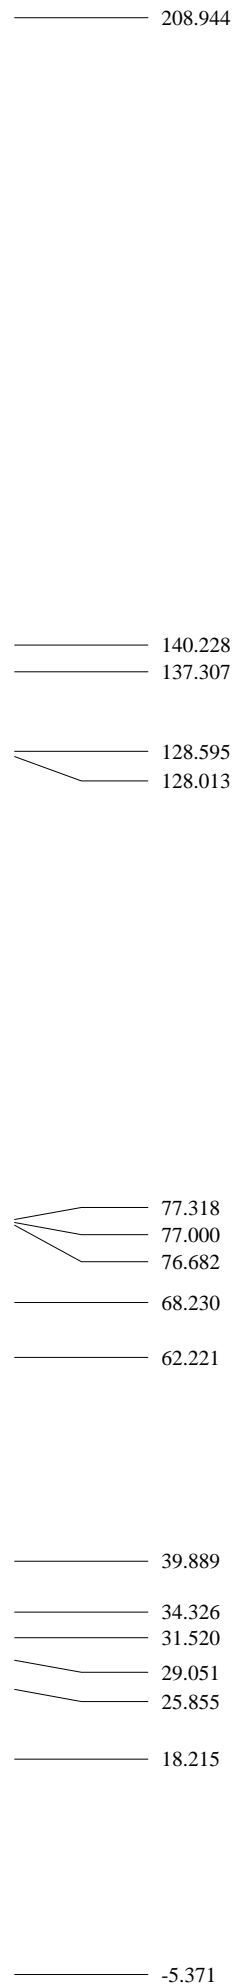

S80

CDCI<sub>3</sub>, 100 MHz

200 190 180 170 160 150 140 130 120 110 100 90 80 70 60 50 40 30 20 10 0 -10



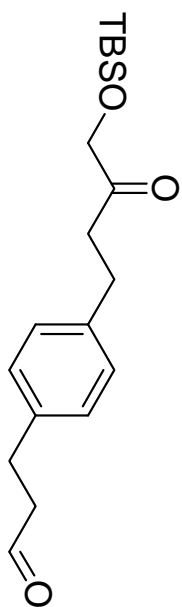

13

9.805  
9.800  
9.796

7.260  
7.107

4.138  
2.937  
2.914  
2.889  
2.874  
2.855  
2.851  
2.823  
2.819  
2.803  
2.800  
2.778  
2.776  
2.772  
2.756  
2.751  
2.749  
2.725

0.904

0.061

11.0 10.0 9.0 8.0 7.0 6.0 5.0 4.0 3.0 2.0 1.0 0.0

0.94

4.01

1.98

4.02  
4.00

9.01

5.94

S81

CDCl<sub>3</sub>, 300 MHz

13

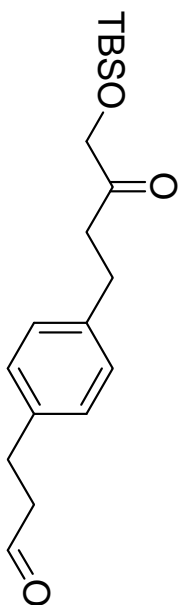

|         |  |
|---------|--|
| 210.033 |  |
| 201.531 |  |
| 138.876 |  |
| 137.958 |  |
| 128.447 |  |
| 128.301 |  |
| 77.424  |  |
| 77.000  |  |
| 76.576  |  |
| 69.339  |  |
| 45.185  |  |
| 39.721  |  |
| 28.715  |  |
| 27.567  |  |
| 25.694  |  |
| 18.207  |  |
| -5.603  |  |

S82

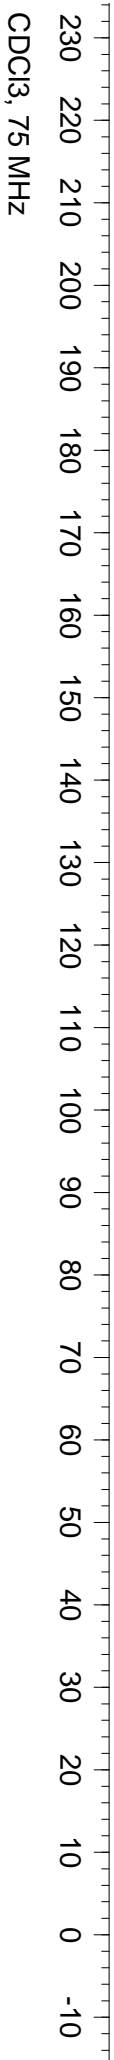

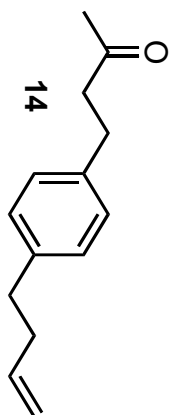

7.260  
7.112

5.913  
5.897  
5.888  
5.880  
5.871  
5.854  
5.845  
5.838  
5.828  
5.812  
5.069  
5.026  
4.999  
4.973

2.892  
2.875  
2.855  
2.772  
2.753  
2.733  
2.702  
2.683  
2.693  
2.389  
2.373  
2.353  
2.334  
2.144

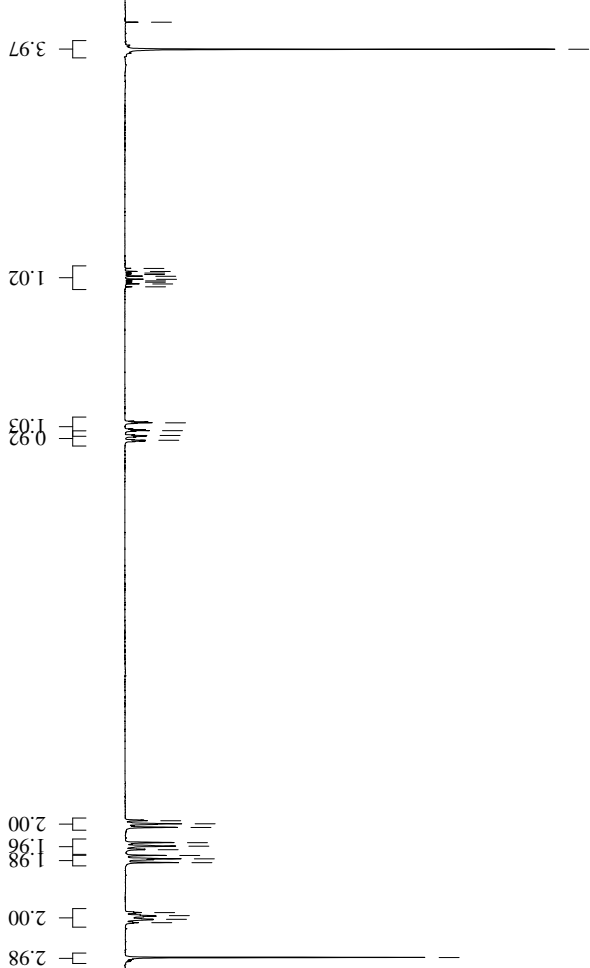

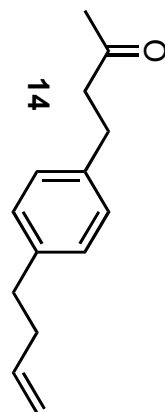

207.956

139.570

138.301

138.052

128.472

128.140

114.807

77.318

77.000

76.682

45.192

35.459

34.874

30.009

29.291

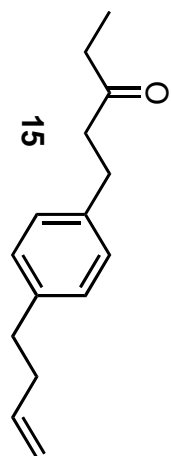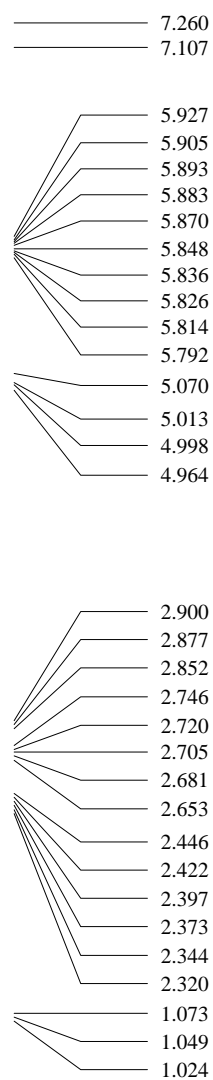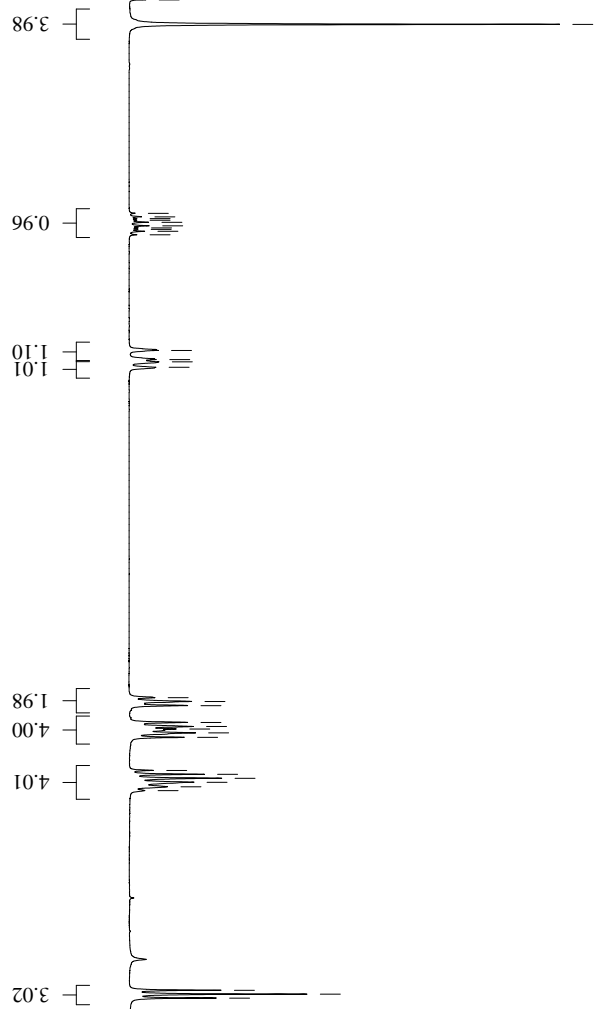

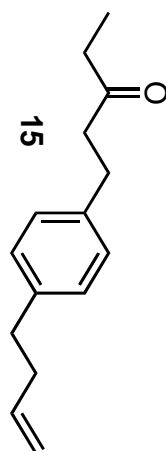

210.722

139.540

138.500

138.081

128.469

128.172

114.816

77.424

77.000

76.576

43.928

36.076

35.495

34.886

29.410

7.729

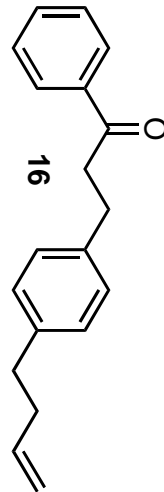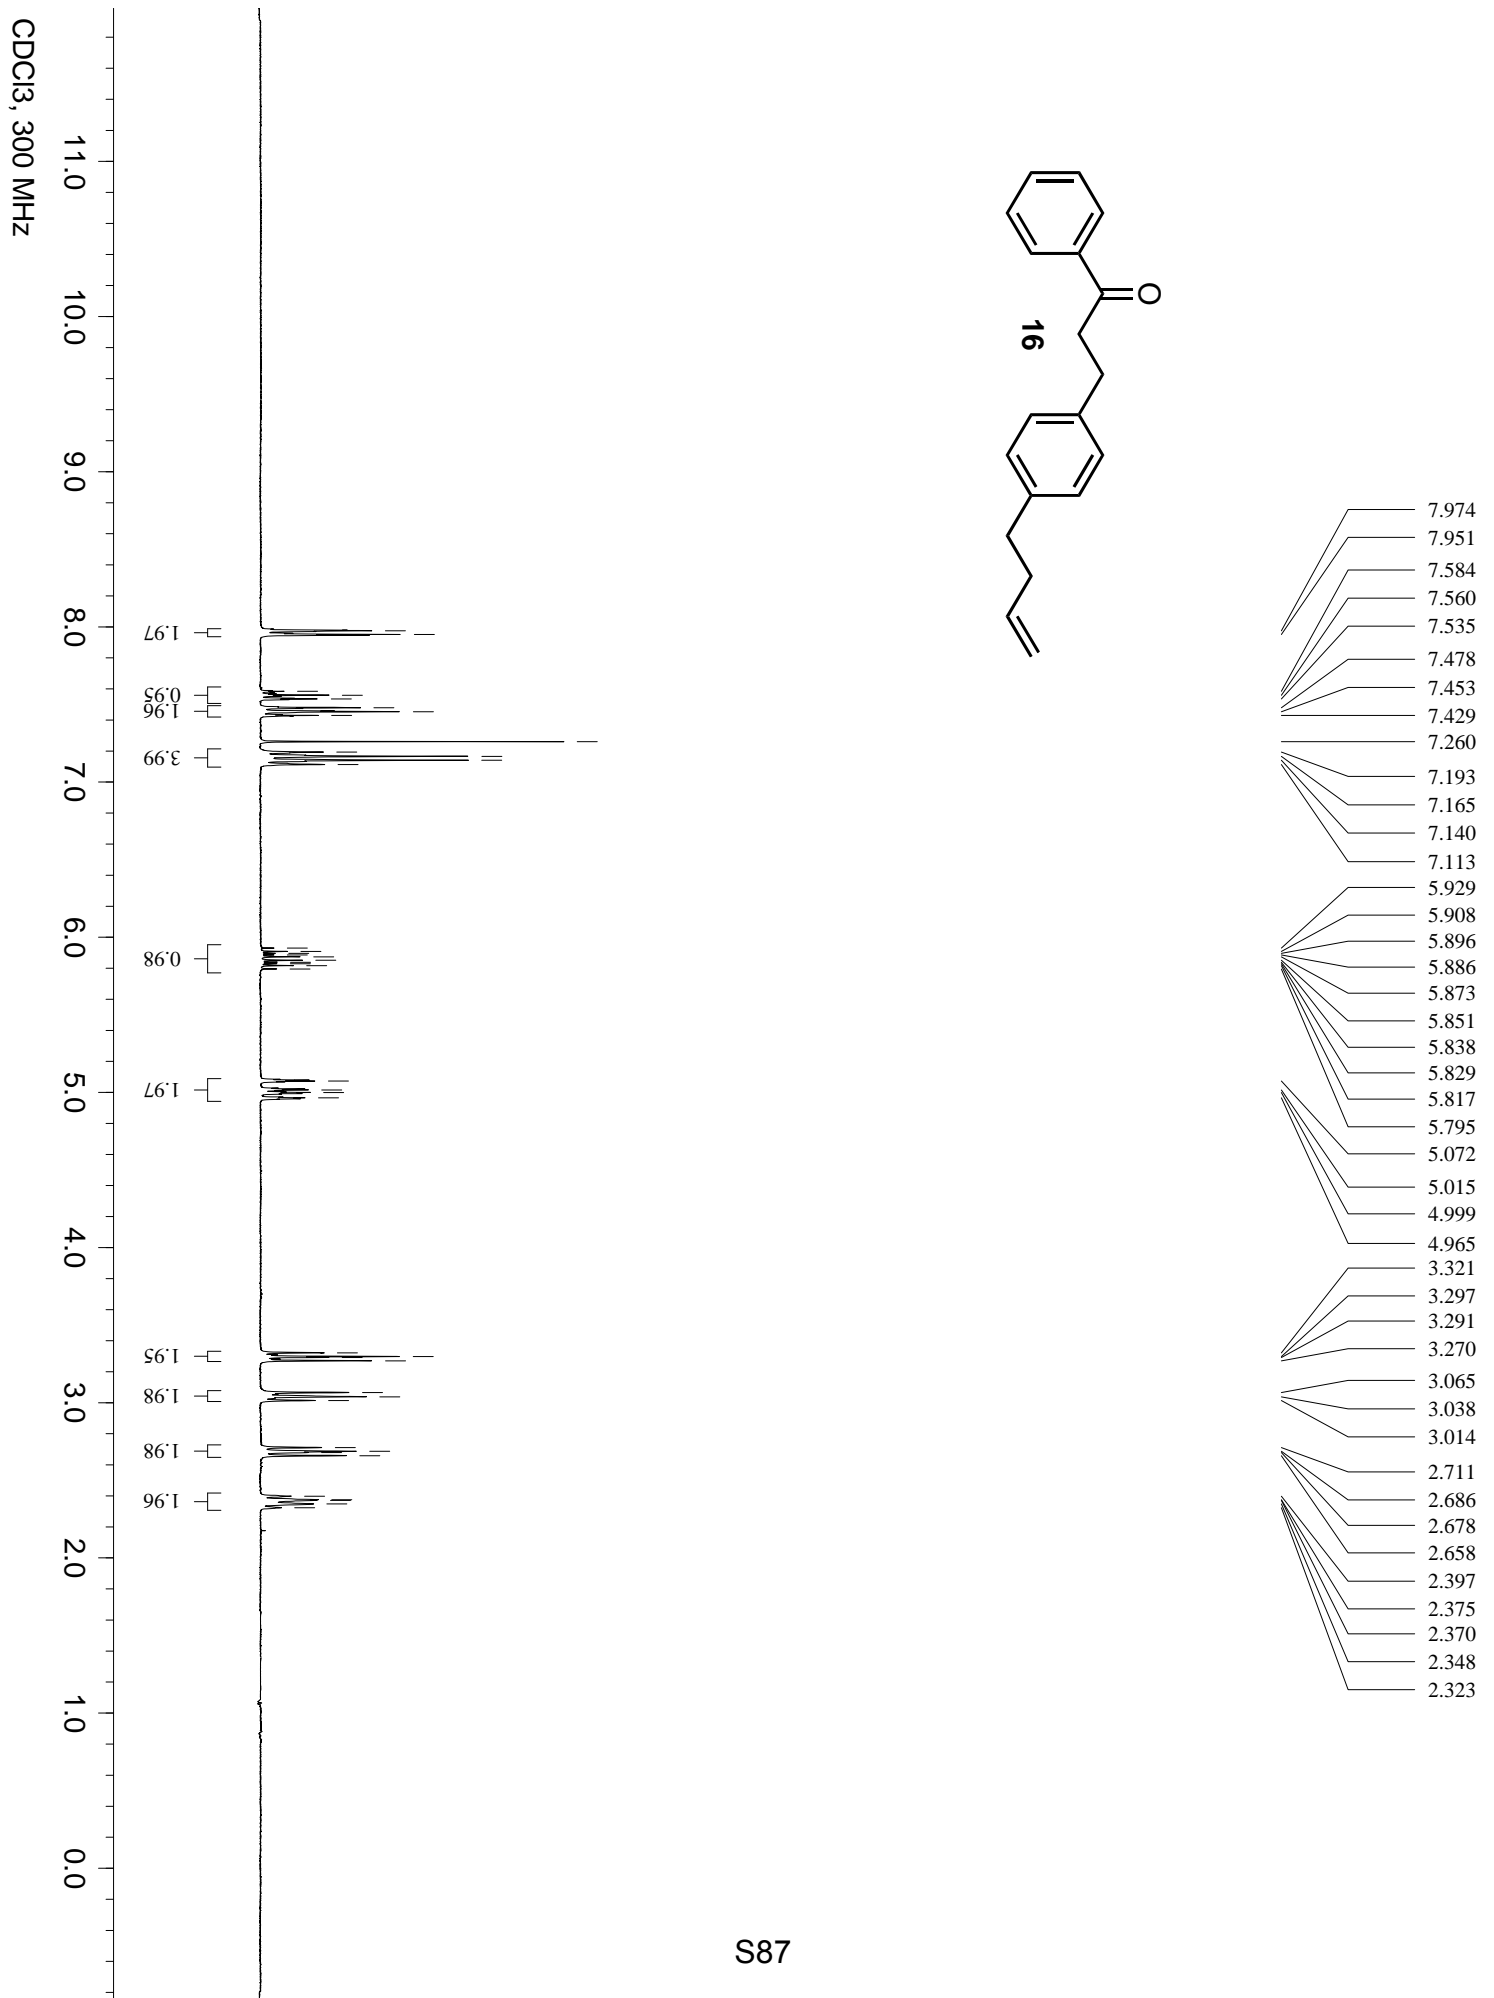

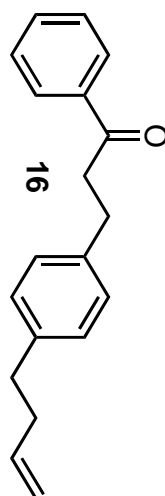

199.334

139.605  
138.596  
138.091  
136.757  
133.004  
128.536  
128.513  
128.291  
127.987  
114.827

77.318  
77.000  
76.682

40.493  
35.504  
34.886  
29.665

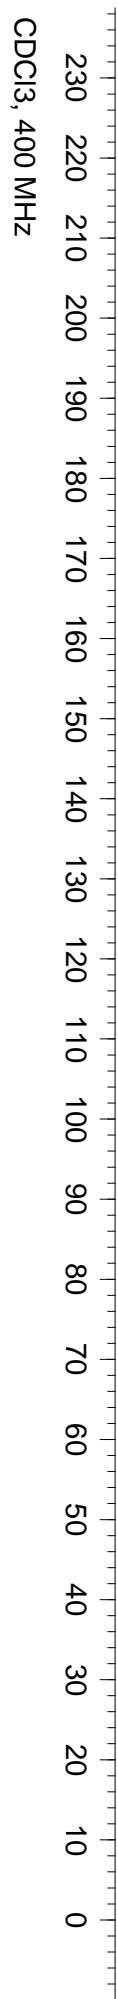



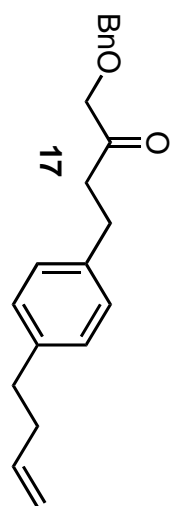

7.377  
7.334  
7.308  
7.260  
7.097  
5.902  
5.886  
5.877  
5.870  
5.860  
5.844  
5.834  
5.827  
5.818  
5.801  
5.059  
5.019  
4.984  
4.959  
4.553  
4.023  
2.904  
2.887  
2.868  
2.801  
2.783  
2.762  
2.691  
2.672  
2.652  
2.376  
2.357  
2.337  
2.321

5.04  
3.98  
1.03  
0.99  
2.00  
2.00  
2.01  
2.00  
2.07

CDCl<sub>3</sub>, 400 MHz

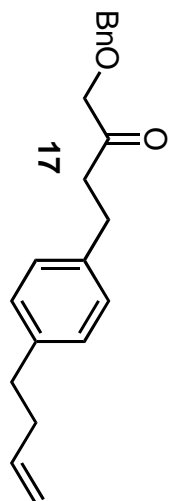

208.035

139.659  
138.146  
138.063  
137.092  
128.502  
128.470  
128.226  
127.972  
127.863  
114.842

77.423  
77.000  
76.577  
75.102  
73.303

40.620  
35.481  
34.881  
28.859

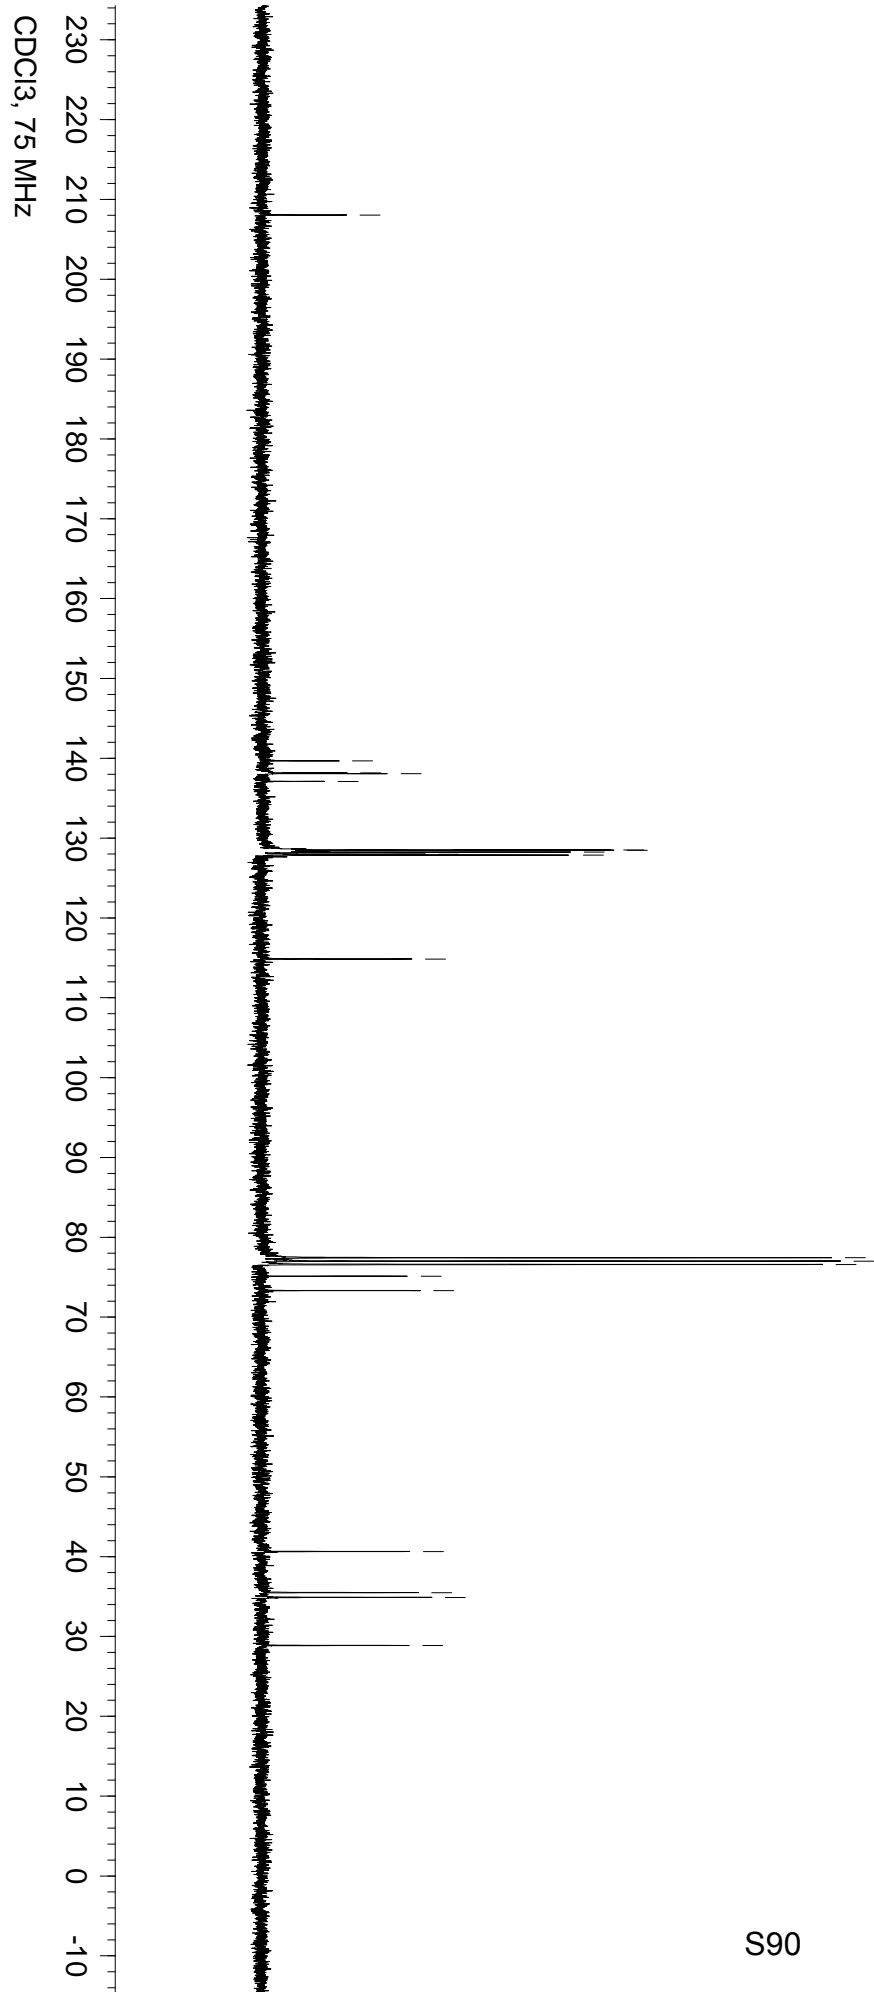

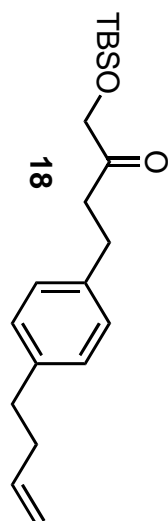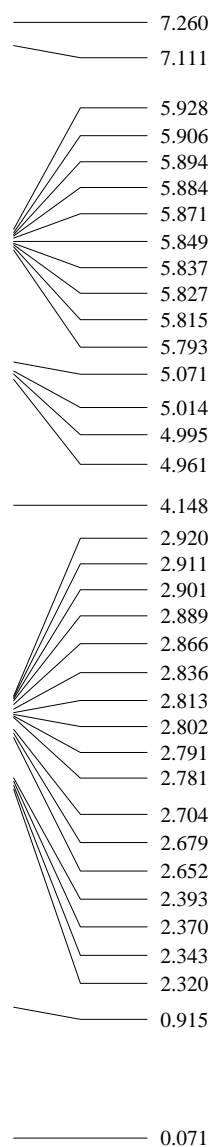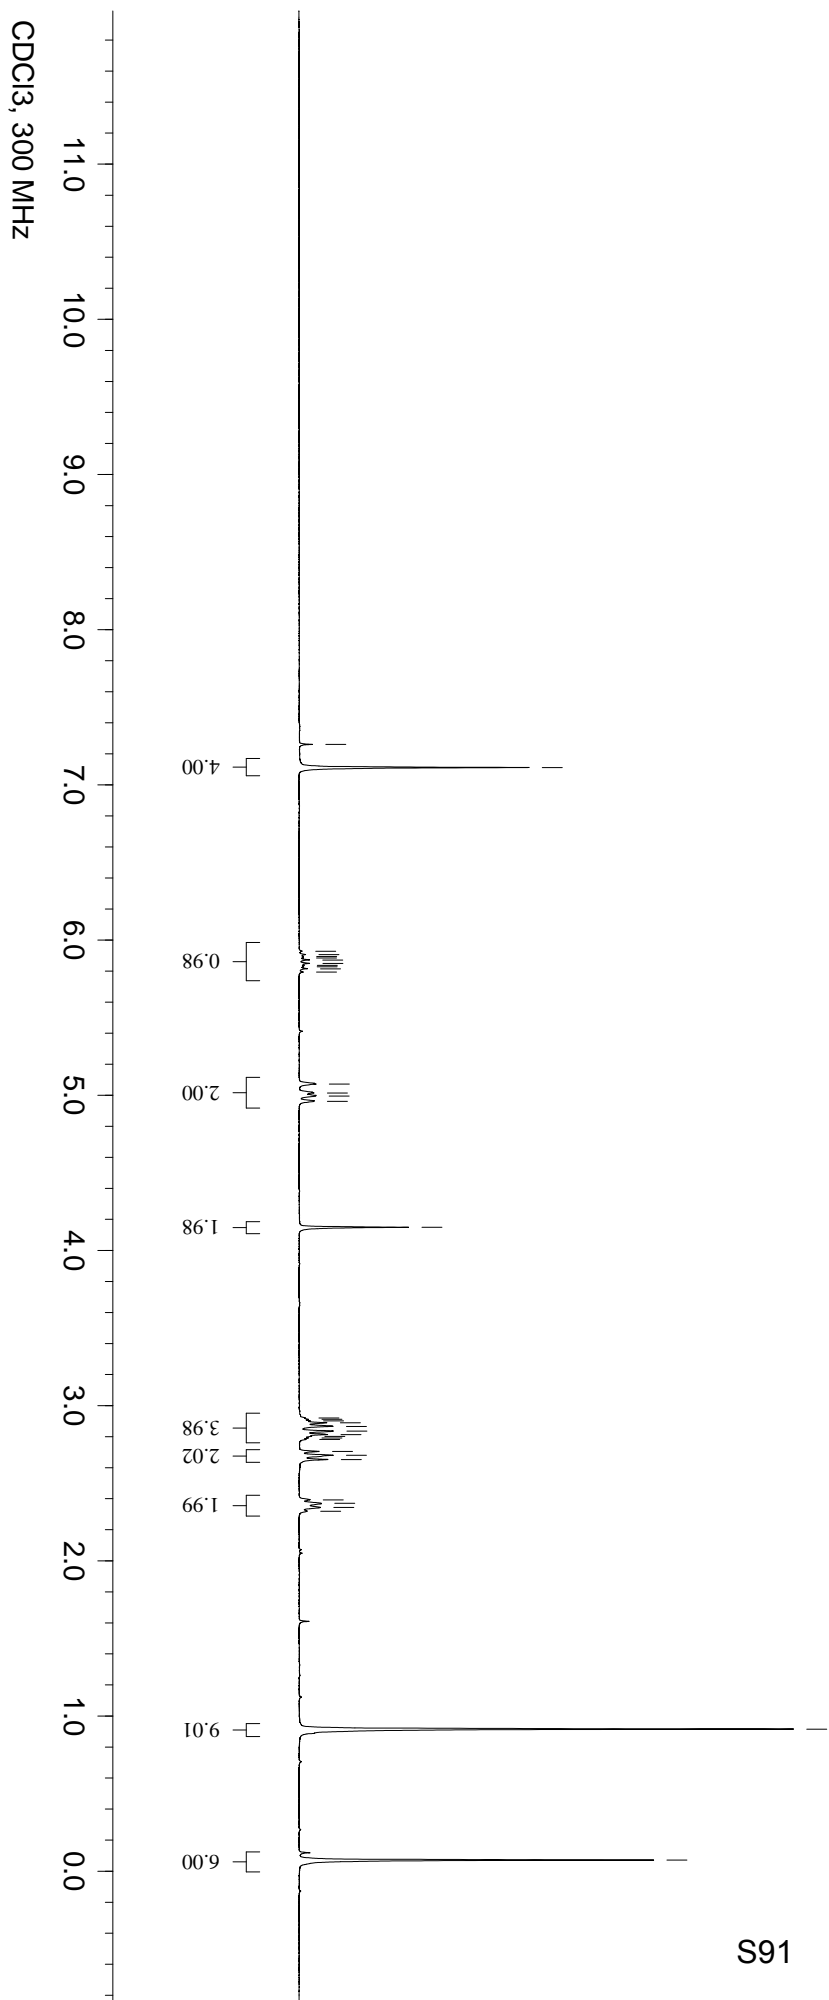

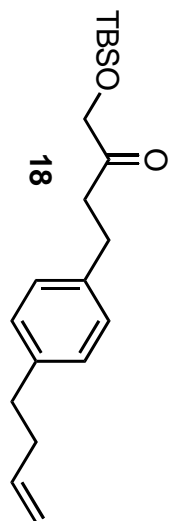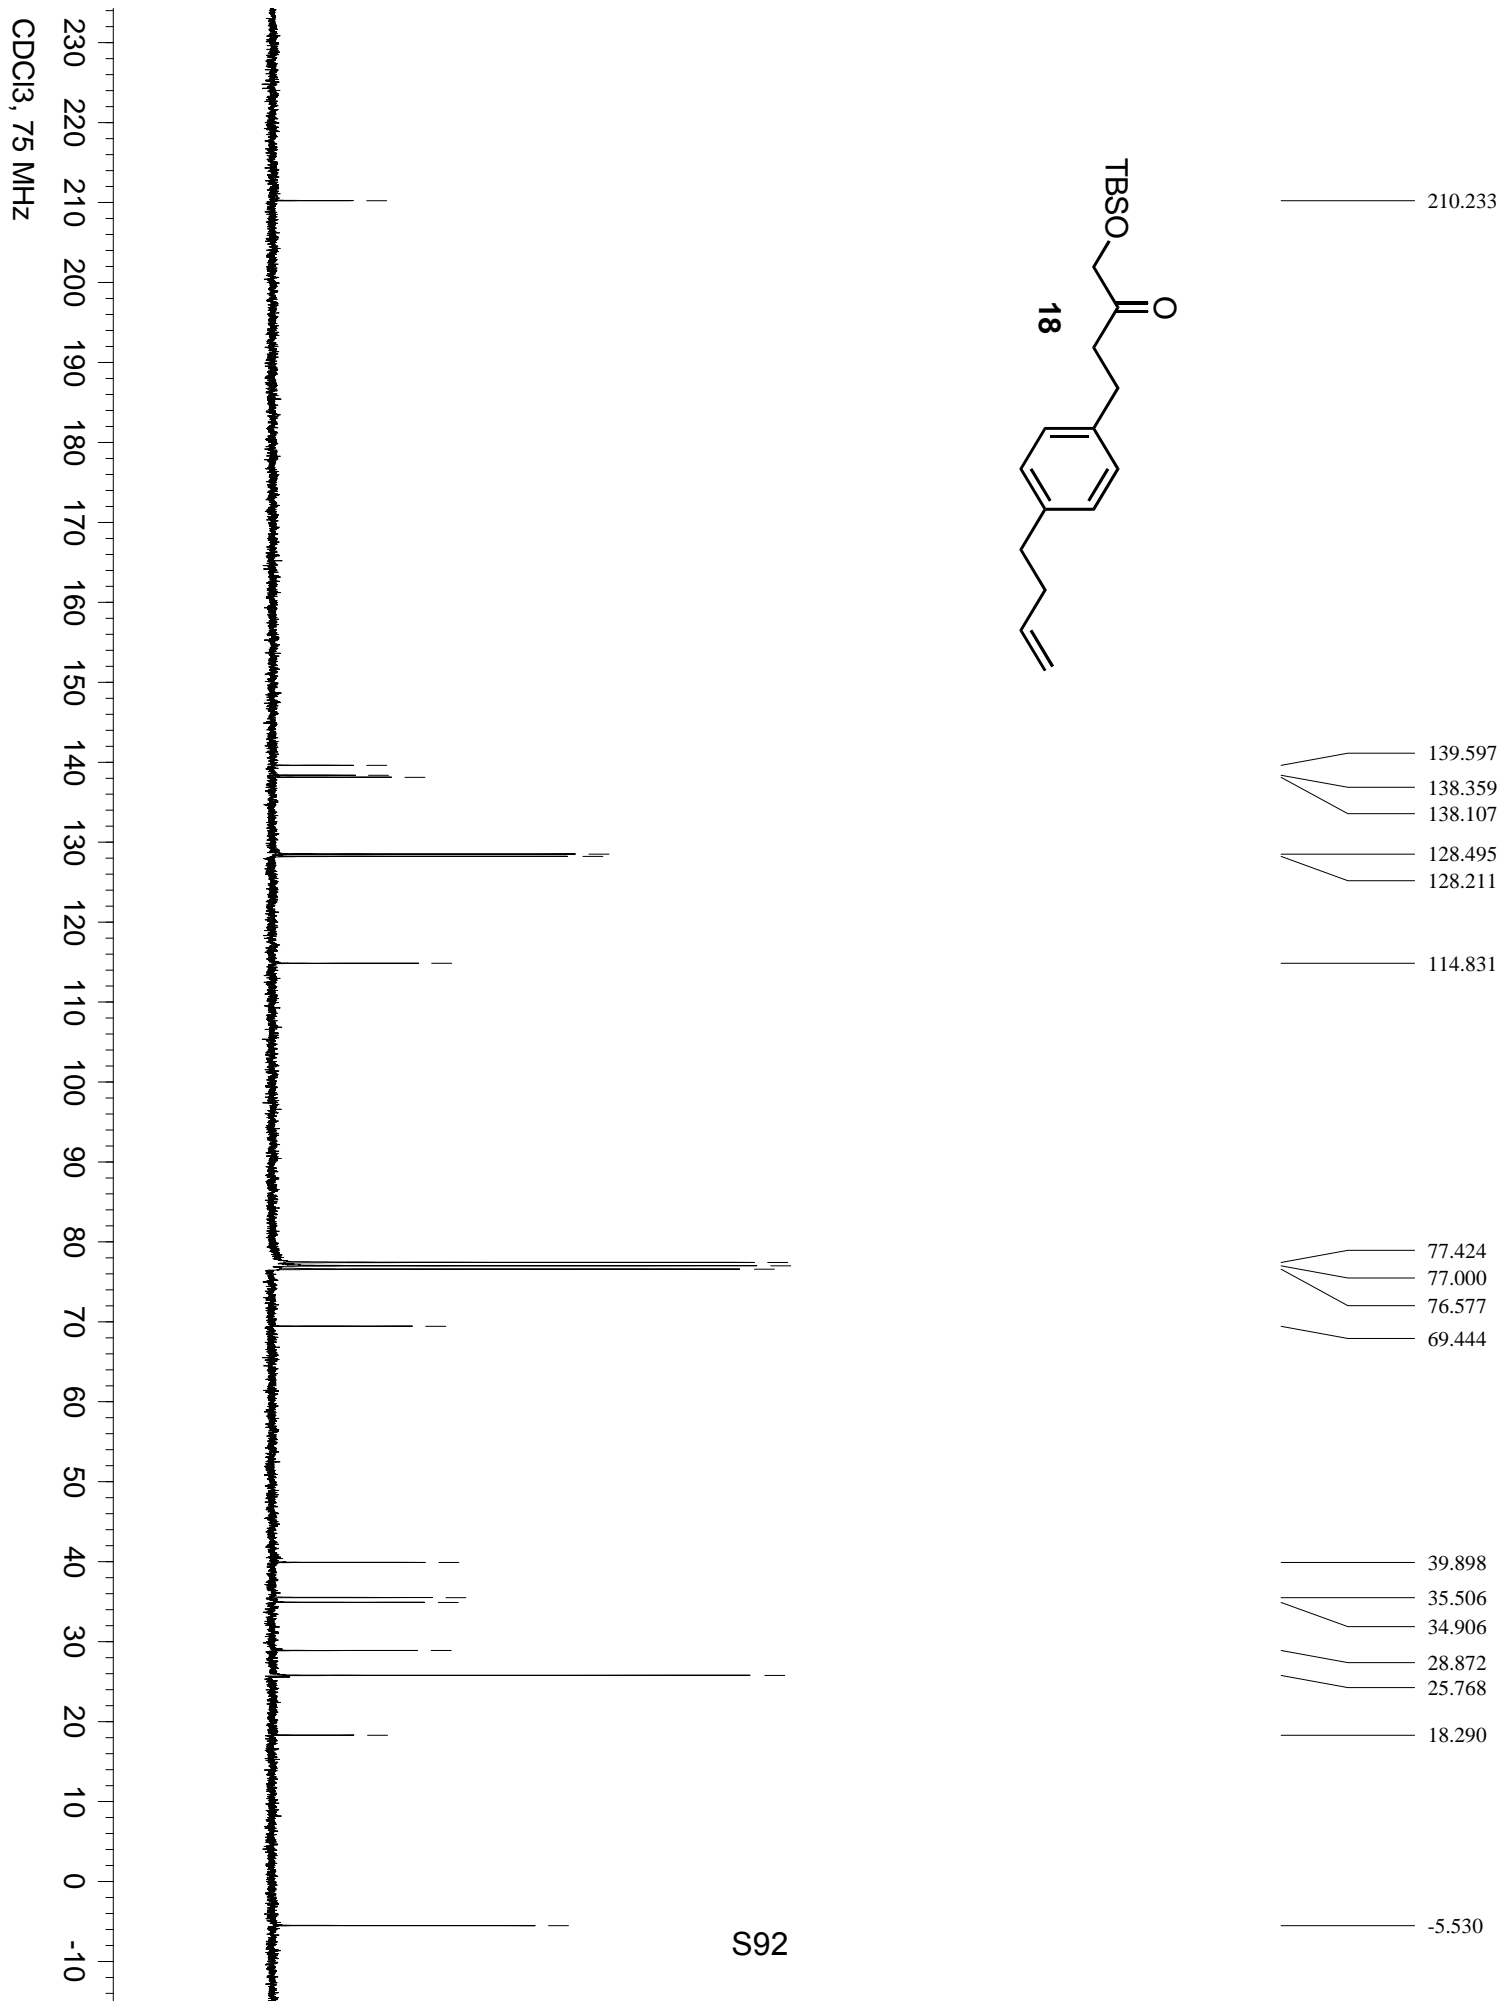

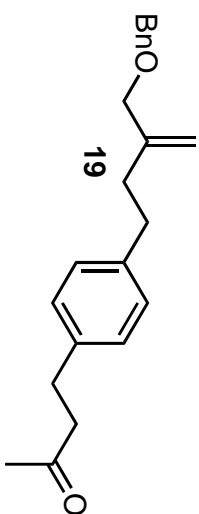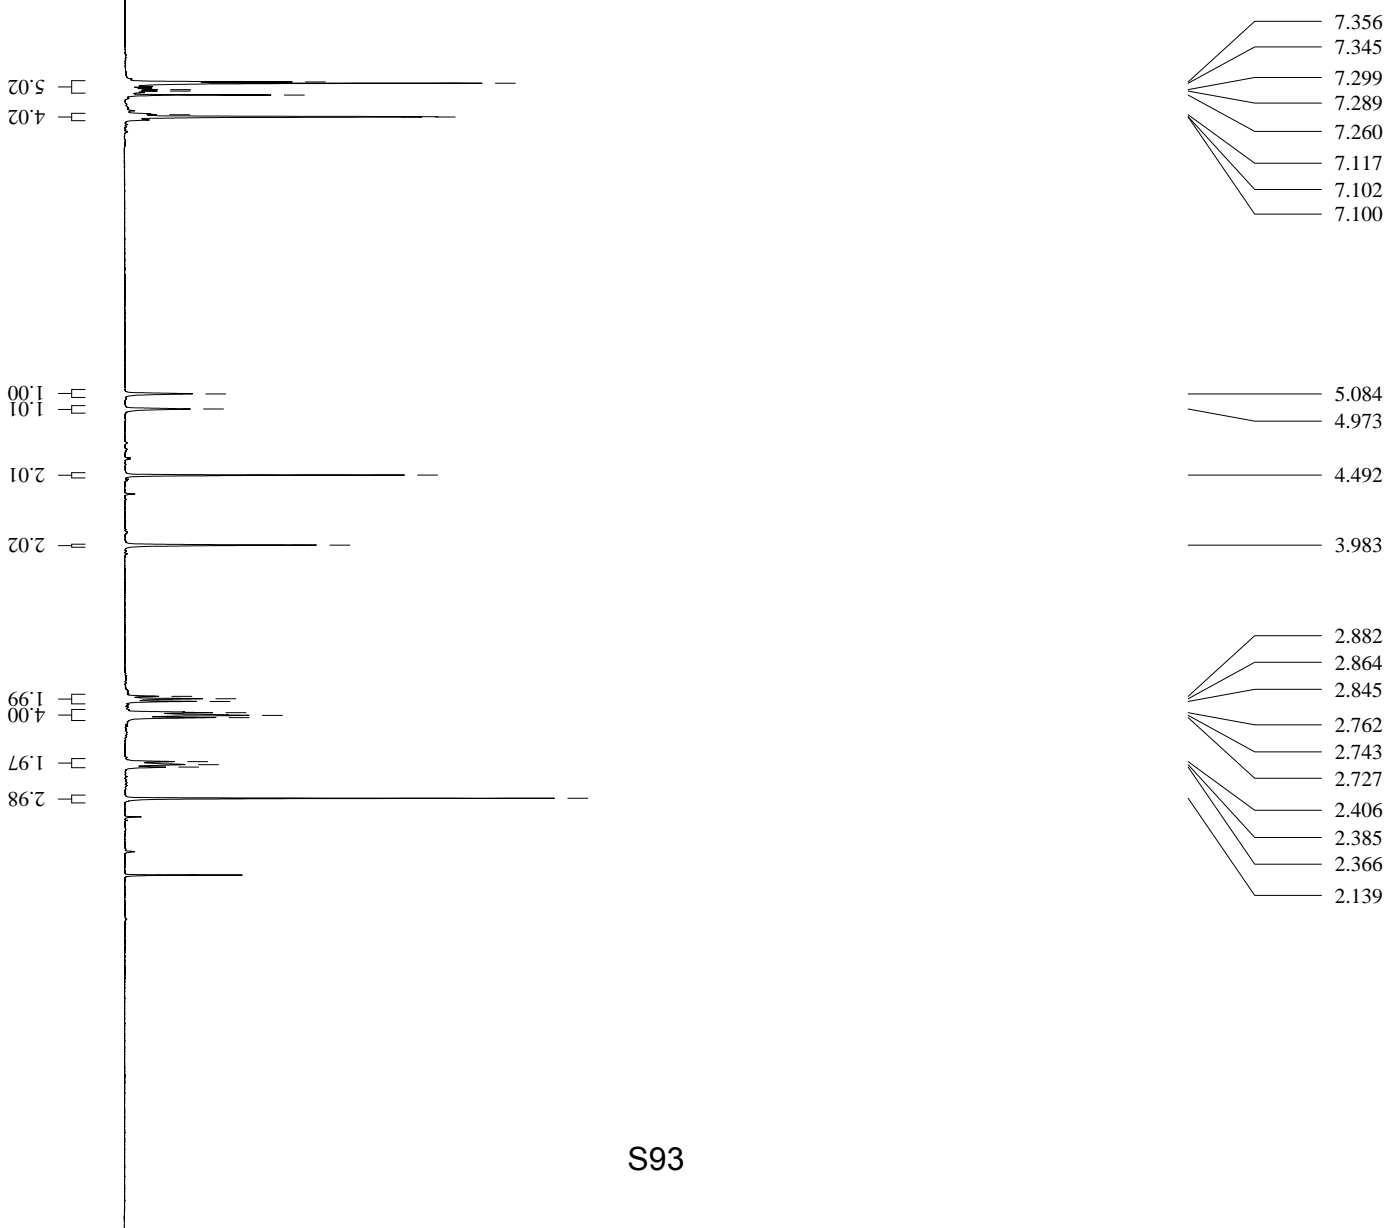

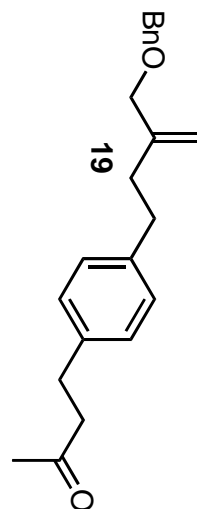

208.102

145.520

139.725

138.365

138.321

128.441

128.351

128.201

127.672

127.548

112.203

77.318

77.000

76.683

73.184

71.945

45.254

34.884

33.658

30.087

29.306

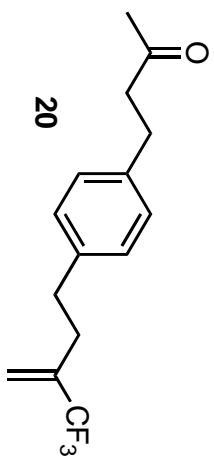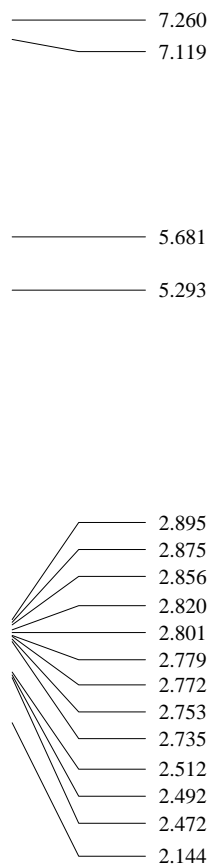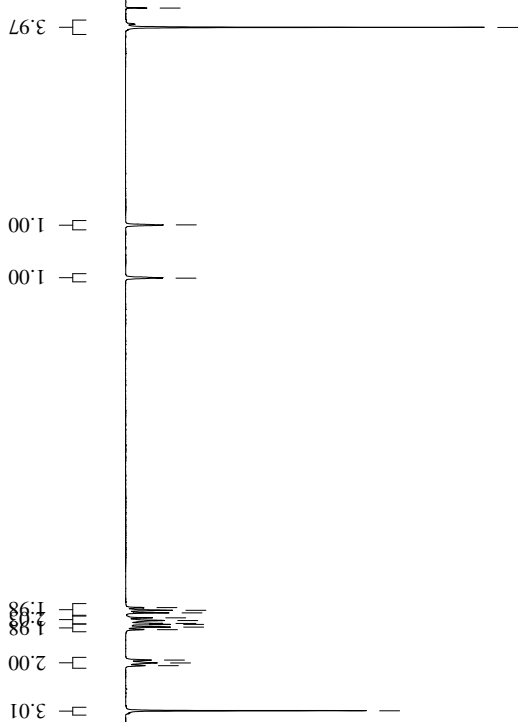

208.005

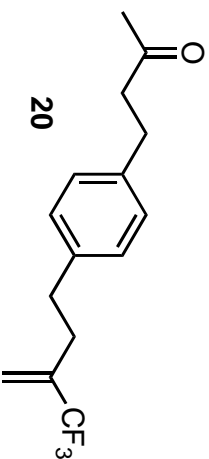

138.834  
138.317  
138.121  
137.829  
137.539  
137.250  
128.439  
128.363  
127.813  
125.091  
122.371  
119.650  
118.189  
118.131  
118.073  
118.016

77.318  
77.000  
76.682

45.154

33.275  
31.173  
30.052  
29.262

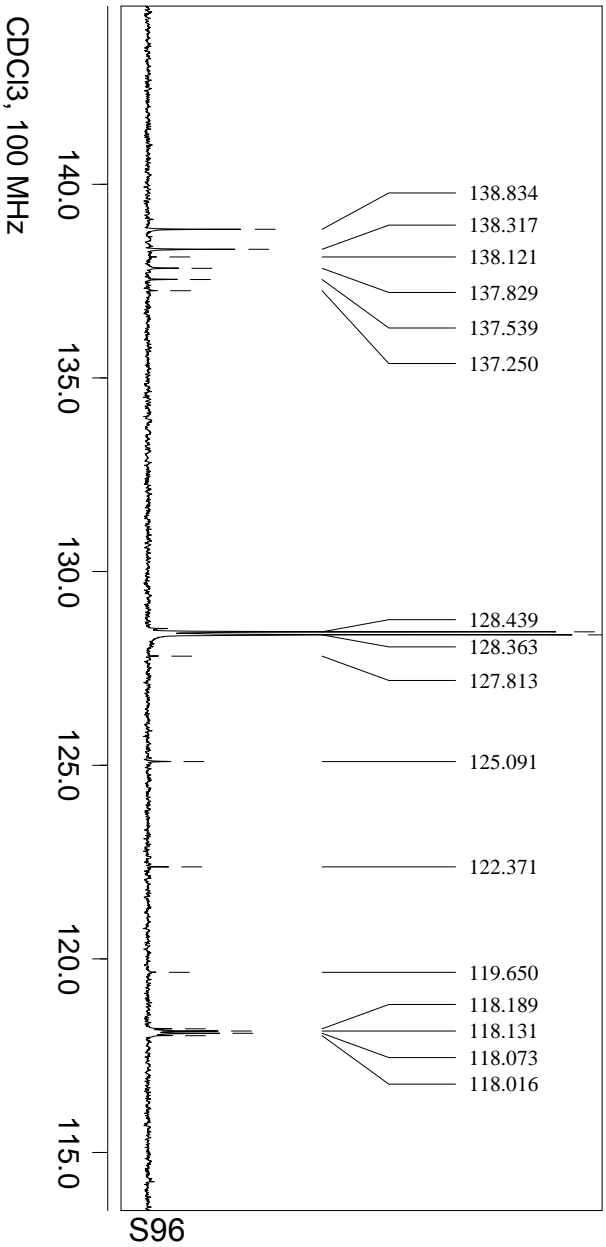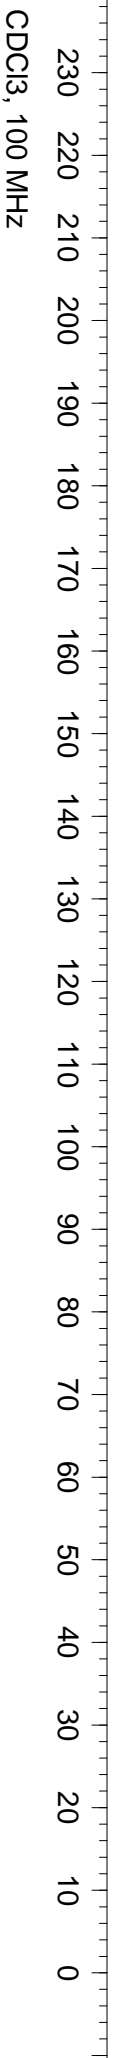



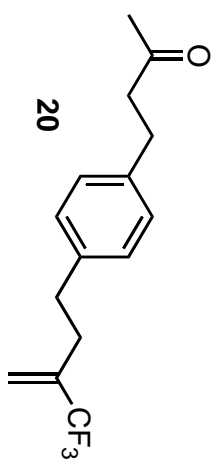

-68.892

-20 -30 -40 -50 -60 -70 -80 -90 -100 -110 -120

CDCl<sub>3</sub>, 282 MHz

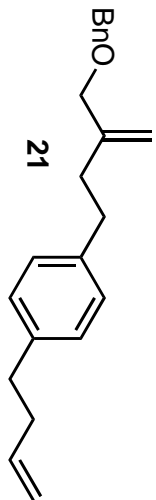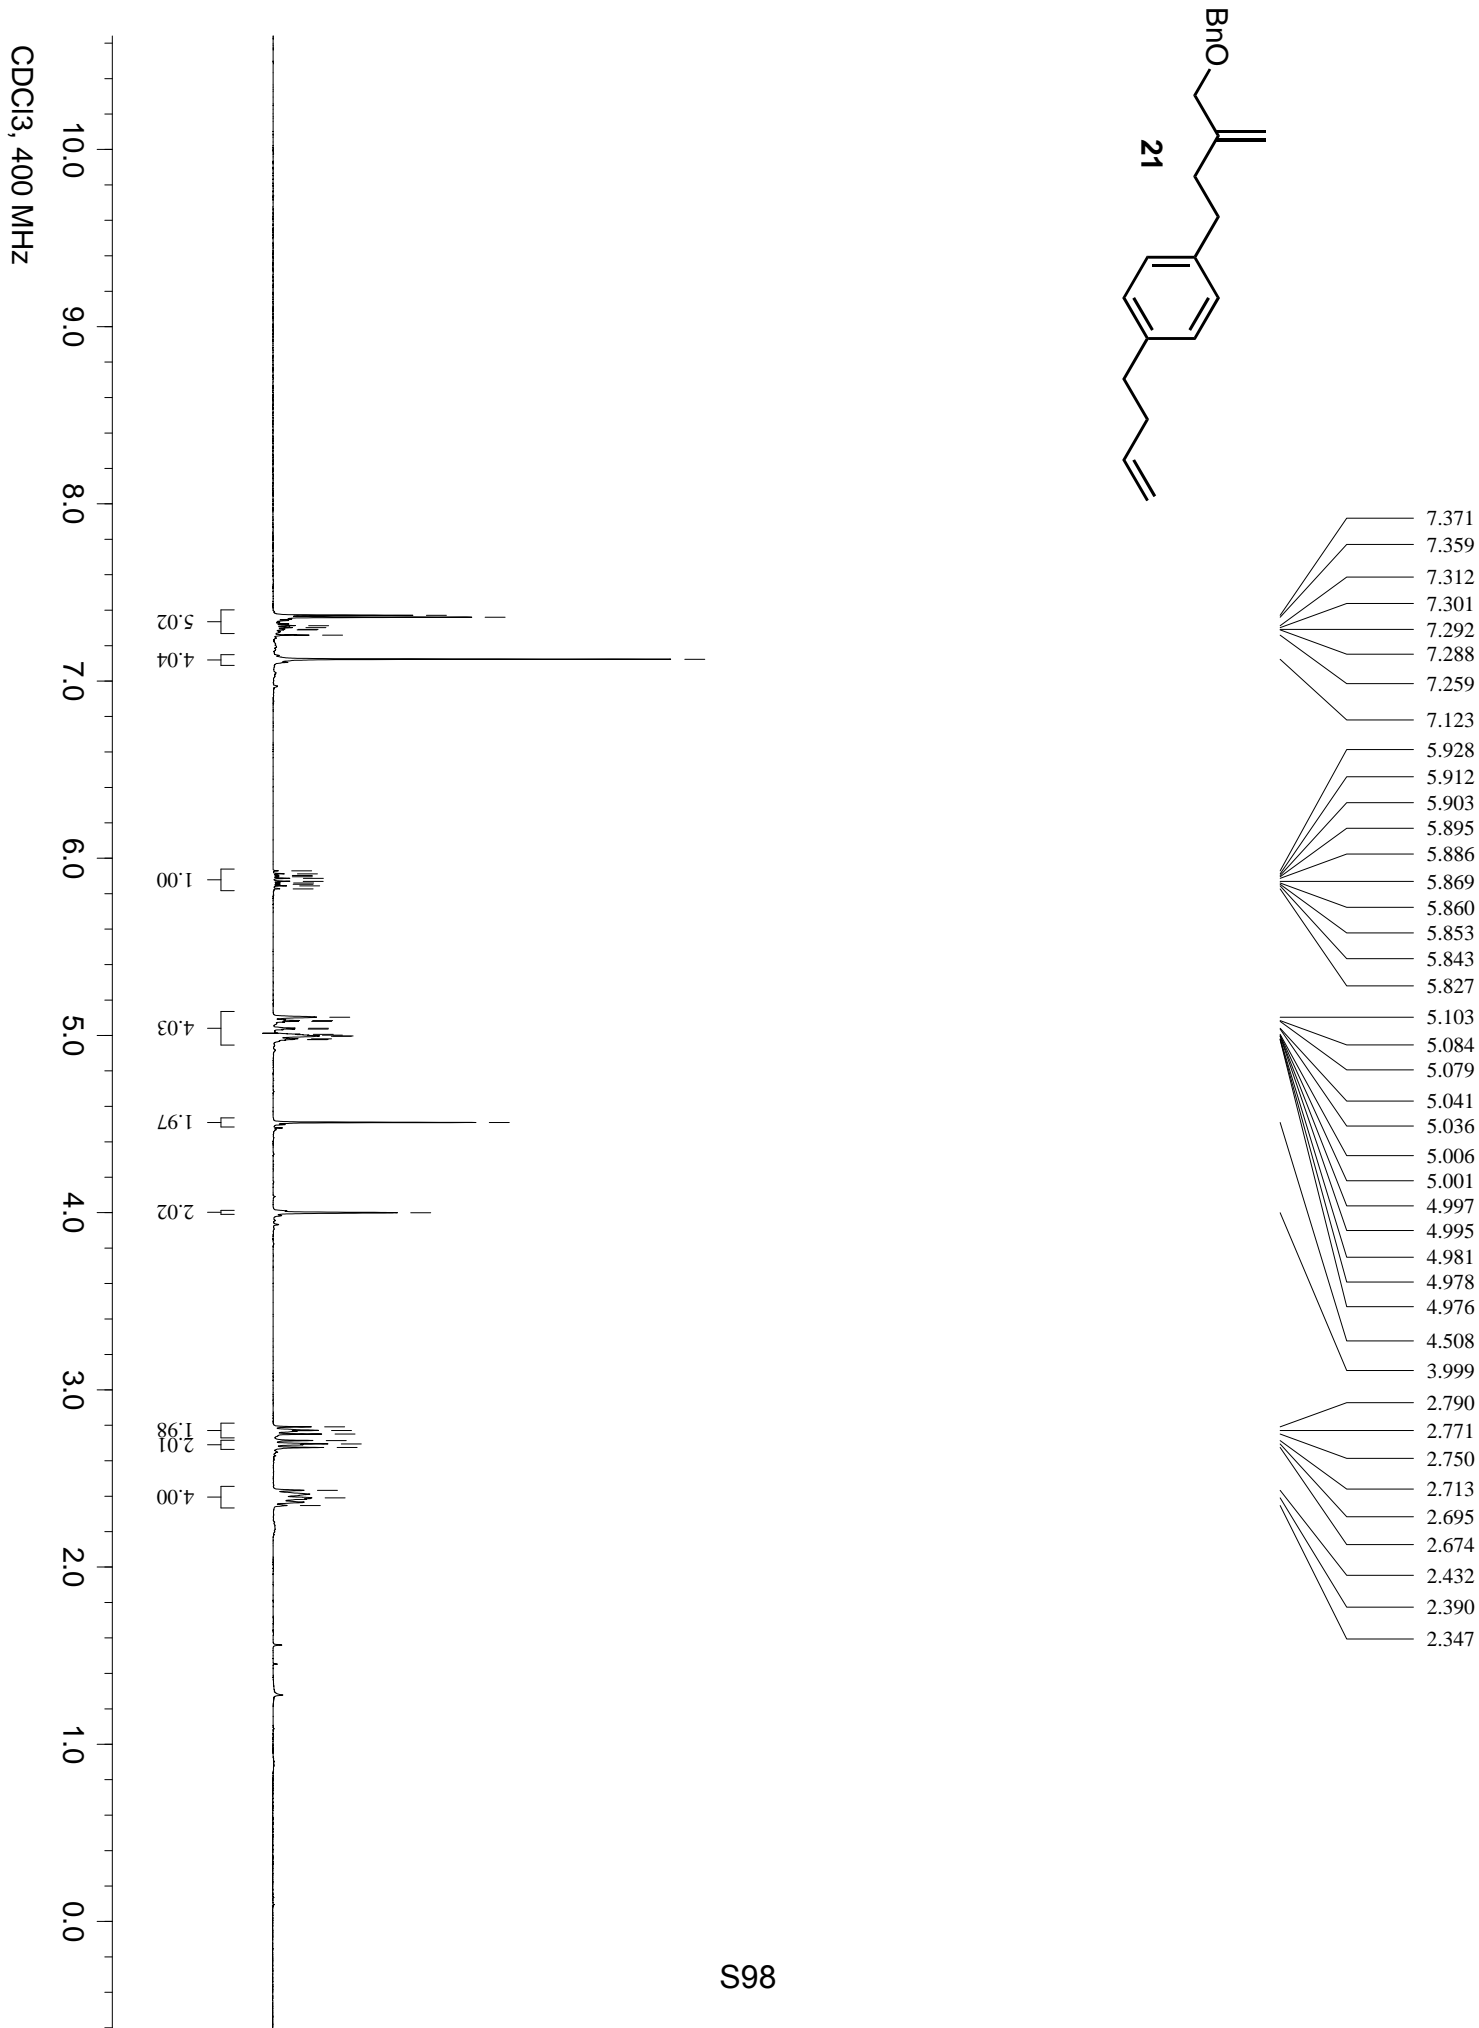

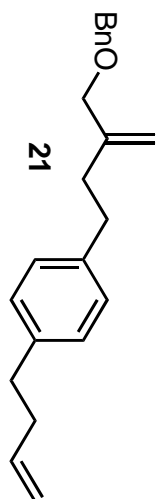

|         |
|---------|
| 145.627 |
| 139.357 |
| 139.287 |
| 138.364 |
| 138.184 |
| 128.326 |
| 128.233 |
| 127.667 |
| 127.526 |
| 114.787 |
| 112.119 |

|        |
|--------|
| 77.317 |
| 77.000 |
| 76.683 |
| 73.210 |
| 71.961 |

|        |
|--------|
| 35.551 |
| 34.944 |
| 33.739 |

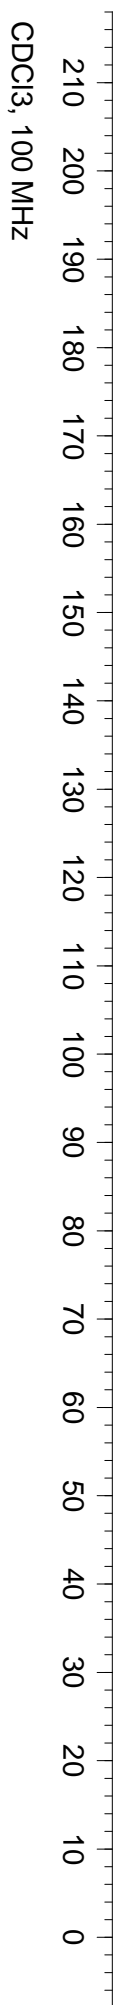

Supplement: Supplementary file 1 [file 4613869]
